1 **Single-cell RNA-seq reveals identity and heterogeneity of malignant osteoblast**  
2 **cells and TME in osteosarcoma**

3 *Yan Zhou*<sup>\*1</sup>, *Dong Yang*<sup>\*4</sup>, *Qing-Cheng Yang*<sup>\*4</sup>, *Xiao-Bin Lv*<sup>\*7</sup>, *Wen-Tao Huang*<sup>\*5</sup>, *Zhenhua*  
4 *Zhou*<sup>6</sup>, *Ya-Ling Wang*<sup>1</sup>, *Zhichang Zhang*<sup>\*4</sup>, *Ting Yuan*<sup>\*4</sup>, *Xiaomin Ding*<sup>1</sup>, *Li-Na Tang*<sup>1</sup>, *Jian-Jun*  
5 *Zhang*<sup>1</sup>, *Jun-Yi Yin*<sup>1</sup>, *Yu-Jing Huang*<sup>1</sup>, *Wen-Xi Yu*<sup>1</sup>, *Yong-Gang Wang*<sup>1</sup>, *Chen-Liang Zhou*<sup>1</sup>, *Yang*  
6 *Su*<sup>1</sup>, *Ai-Na He*<sup>1</sup>, *Yuan-Jue Sun*<sup>1</sup>, *Zan Shen*<sup>1</sup>, *Bin-Zhi Qian*<sup>8</sup>, *Peizhan Chen*<sup>#2</sup>, *Xinghua Pan*<sup>#3</sup>, *Yang*  
7 *Yao*<sup>#1</sup>, *Hai-Yan Hu*<sup>#1</sup>

- 8 1. Oncology Department of Shanghai Jiao Tong University Affiliated Sixth People's Hospital,  
9 Shanghai; No 600 Yishan Road Xuhui District of Shanghai City, China, 200233.  
10 2. Clinical Research Center, Ruijin Hospital North, Shanghai Jiao Tong University School of  
11 Medicine, Shanghai, 200031  
12 3. Department of Biochemistry and Molecular Biology, School of Basic Medical Sciences,  
13 Southern Medical University, and Guangdong Provincial Key Laboratory for Single Cell  
14 Technology and Application, Guangzhou, Guangdong Province, 510515, China.  
15 4. Orthopaedic Department of Shanghai Jiao Tong University Affiliated Sixth People's Hospital,  
16 Shanghai; No 600 Yishan Road Xuhui District of Shanghai City, China, 200233.  
17 5. Pathology Department of Shanghai Jiao Tong University Affiliated Sixth People's Hospital,  
18 Shanghai; No 600 Yishan Road Xuhui District of Shanghai City, China, 200233.  
19 6. Department of Orthopaedic Oncology, Changzheng Hospital, Naval Military Medical  
20 University (The Second Military Medical University), Shanghai 200003, China  
21 7. Central Laboratory of the First Hospital of Nanchang; No 128 Xiangshan N Road, Donghu  
22 District, Nanchang City, Jiangxi Province, China, 330008.  
23 8. MRC Centre for Reproductive Health & Edinburgh Cancer Research UK Centre, Queen's  
24 Medical Research Institute, Edinburgh, United Kingdom, EH16 4TJ

25 **ABSTRACT**

26 Osteosarcoma (OS) has high heterogeneity and poor prognosis. In order to explore the  
27 molecular mechanism of OS and the tumor micro-environment (TME) on OS, we  
28 employed single-cell RNA-sequencing (scRNA-seq) on 110,745 individual cells from  
29 OS primary lesion, recurrent focal and metastatic tissues. We identified 5 main  
30 malignant subpopulations of OS cells, 3 clusters of osteoclast(OC) and 2 types of  
31 cancer-associated fibroblasts (CAFs). Further we found that the progenitor OC and,  
32 antigen presenting CAF (apCAF) were lower in lung metastatic and recurrent tumor

---

<sup>1</sup> \* The first five authors contributed equally to this work.

2 # To whom correspondence should be addressed to [xuri1104@163.com](mailto:xuri1104@163.com), [panvictor@qq.com](mailto:panvictor@qq.com)  
[Yangyao\\_6@hotmail.com](mailto:Yangyao_6@hotmail.com) and [pzchen@me.com](mailto:pzchen@me.com). This work was supported by National Natural Science  
Foundation of China (No 8187215, 81503396 and 81372873) and National Key Research Project of Science &  
Technology Ministry(2016YFC0106204) and Shanghai Ministry Science & Technology Research Project  
(17411950304). Bin-Zhi Qian is supported by CRUK Career Development Fellowship C49791/A17367 and ERC  
Starting Grant 716379.

33 tissues than in primary tumor tissue. M2-like macrophages were predominant in the  
34 TME myeloid cells. Inactivation state of tumor-infiltrating T cells, mainly the  
35 CD4-/CD8- T and Treg cells, existed in lung metastatic tissues. T-cell  
36 immunoreceptor with Ig and ITIM domains (TIGIT) expressed in 11 samples. We  
37 then blocked TIGIT which significantly enhanced the cytotoxic effects of primary T  
38 cells on OS cell lines. Our report represents the first use of scRNA-seq for the  
39 transcriptomic profiling of OS cells. Thus, the findings in this study will serve as a  
40 valuable resource for deciphering the intra-tumoral heterogeneity in OS and provide  
41 potential therapeutic strategies for OS in clinic.

42

### 43 **Introduction**

44 Osteosarcoma (OS) is a highly aggressive malignant bone tumor frequently occurring  
45 in children and adolescents[1-3]. The incidence of OS is about 4.8 per million per  
46 year. Traditionally, the standard treatment protocol for OS consists of extensive  
47 surgical resection, chemotherapy, and radiation. Researchers have been screening the  
48 effective target drugs on OS for decades. In recent years, the vascular endothelial  
49 growth factor receptor- tyrosine kinase inhibitors (VEGFR-TKIs) have appeared  
50 outstanding due to their effectiveness. However, as stated by the Surveillance,  
51 Epidemiology, and End Results (SEER) Program, the five-year overall survival rate  
52 for patients with bone sarcoma is 66.2% (2009 to 2015)[4]. According to the  
53 published data, the relapse and/or metastasis rate of OS remains to be higher than  
54 30%. For these patients, the five-years overall survival rate was even worse, being  
55 about 10–30% [5]. As such, there is an urgent need to identify the molecular  
56 mechanism and novel therapeutics that may improve management of OS.

57 Immune checkpoint inhibitors have led to a breakthrough in immunotherapy for a  
58 variety of solid tumors [6,7]. However programmed cell death 1 (PD-1) inhibition has  
59 limited effect in OS[8,9]. Davoli revealed that highly aneuploid tumors showed  
60 reduced expression of markers of cytotoxic infiltrating immune cells, especially  
61 CD8+ T cells, and increased expression of cell proliferation markers. Immune evasion  
62 markers correlated mainly with arm- and chromosome-level somatic copy number  
63 alterations (SCNAs), consistent with a mechanism related to general gene dosage  
64 imbalance rather than the action of specific genes. In this regard, OS is the typical one  
65 [10]. Previous reports show that OS is abundant in widespread and recurrent somatic  
66 chromosomal lesions, including structural variations (SVs) and copy number  
67 alterations (CNAs); however, few recurrent point mutations in protein-encoding genes  
68 have been identified in OS[11-15]. Low expression of immune-associated genes is

69 another significant phenotype for OS[16]. How to convert the immunosuppressive  
70 microenvironment into the one that favors the induction of antitumor immunity is  
71 indispensable for effective cancer immunotherapy.

72 Here, we employed single cell transcriptome approach to dissect the  
73 heterogeneity of OS cells. We analyzed the transcriptomic profiles of a total of  
74 110745 cells from 7 primary tumors, 2 lung metastatic and 2 recurrent OS tissues. We  
75 first divided the OS cells into 5 sub-clusters and osteoclast into 3 subtypes. The  
76 profiles of OS, OC and immune-system cells were analyzed. We found that the TME  
77 of the recurrent and lung metastatic OS exhibited more significant suppressivity than  
78 primary tumor tissue. Thus, the results in this study improve the understanding of the  
79 immune-suppressivity observed in advanced OS including distant metastasis and  
80 recurrence, and are potentially valuable in novel treatment strategy for OS.

81 Of importance, we are the first to uncover that Treg cells in OS expressed  
82 TIGIT. TIGIT is a coinhibitory receptor expressed on effector T cells, natural killer  
83 (NK) cells, T regulatory cells (Treg) and T follicular helper (TFH) cells. It has gained  
84 attention as a potential therapeutic target in wide variety of tumors[17-19]. The  
85 antibodies of TIGIT, named BGB-A1217, had registered and recruited on August  
86 2019. Here we explored the preclinical significance of blocking of TIGIT.

## 87 **Method**

### 88 **Patients**

89 The eleven patients for scRNA-seq analysis enrolled in this study were hospitalized  
90 during the period of October 2017 to April 2019 in Shanghai Sixth People's Hospital.  
91 The study was approved by Shanghai Sixth People's Hospital Ethics Committee. Each  
92 patient was provided a written signed consent. All patients were diagnosed according  
93 to the National Comprehensive Cancer Network (NCCN) Clinical Practice Guidelines  
94 in Oncology with the terms of Bone Cancer (Version 2.2019). Among 11 patients for  
95 scRNA-seq, 7 were derived from the primary sites of patients who received traditional  
96 first line combination chemotherapy for OS, including Adriamycin(ADM),  
97 cisplatin(DDP), methotrexate(MTX) and Ifosfamide(IFO) and surgical therapy. 2 lung  
98 metastatic patients and 2 recurrent patients all received the gemcitabine combined  
99 with Docetaxel(GT) chemotherapy treatment. The BC17, one of the lung metastasis  
100 patients, had enrolled in clinical trial NCT03676985 and undergone the anti-PD-L1  
101 treatment for 6 times. For this clinical trial, all enrolled patients had finished the  
102 neoadjuvant chemotherapy, operation and adjuvant chemotherapy. They would accept

103 anti-PDL-1 for one year until the disease progresses. Detailed information of the 11  
104 patients was provided in Table 1 respectively. Tow patient agreed to donate blood for  
105 us to explore the effect of anti-TIGIT.

#### 106 **Sample preparation and cell purification for scRNA-seq**

107 The fresh tumor tissue was stored in the GEXSCOPETM Tissue Preservation Solution  
108 (Singleron) and transported to the Singleron lab on ice as soon as possible. The  
109 specimens were washed with Hanks Balanced Salt Solution (HBSS) for 3 times and  
110 minced into 1–2 mm pieces. Then the tissue pieces were digested with 2 ml  
111 GEXSCOPETM Tissue Dissociation Solution (Singleron) at 37°C for 15 min in 15  
112 ml centrifuge tube with sustained agitation. After digestion, the samples were filtered  
113 through 40- $\mu$ m sterile strainers and subsequently centrifuged at 1,000 rpm for 5  
114 minutes. Thereafter, the supernatants were discarded, and the cell pellets were  
115 suspended in 1 ml PBS (HyClone). To remove the red blood cells, 2 mL  
116 GEXSCOPETM red blood cell lysis bu□er (Singleron) was added at 25°C for 10  
117 minutes. The solution was then centrifuged at 500  $\times$  g for 5 min and suspended in  
118 PBS. The sample was stained with trypan blue (Sigma) and evaluated  
119 microscopically.

#### 120 **10x library preparation and sequencing**

121 Single-cell suspensions were converted to barcoded scRNA-seq libraries by using the  
122 Chromium Single Cell 3'Library, Gel Bead & Multiplex Kit (10x Genomics, V3), and  
123 following the manufacturer's instructions. Briefly, cells were partitioned into Gel  
124 Beads in Emulsion in the ChromiumTM Controller instrument where cell lysis and  
125 barcoded reverse transcription of RNA occurred. Libraries were prepared using 10x  
126 Genomics Library Kits and sequenced on Illumina HiSeq X with 150 bp paired end  
127 reads.

128 Raw reads were processed to generate gene expression profiles using an  
129 internal pipeline. Briefly, after filtering read one without poly T tails, cell barcode and  
130 UMI was extracted. Adapters and poly A tails were trimmed (fastp V1) before  
131 aligning read two to GRCh38 with ensemble version 92 gene annotation (fastp 2.5.3a  
132 and featureCounts 1.6.2). Reads with the same cell barcode, UMI and gene were  
133 grouped together to calculate the number of UMIs per gene per cell. The UMI count  
134 tables of each cellular barcode were used for further analysis. Cell type identification  
135 and clustering analysis using Seurat program. The Seurat program

136 (<http://satijalab.org/seurat/>, R package, v.3.0.1) was applied for analysis of  
137 RNA-Sequencing data.

### 138 **Cell-type identification and subgroup categorization by the t-SNE method.**

139 The individual Seurat objects were integrated with the SCTransformation algorithm  
140 provided by the Seurat package. The top 3,000 Highly variable genes across the cells  
141 were chosen to perform the Principal Component Analysis(PCA) analysis. Top 50  
142 significant PCAs were applied for the graph-based clustering based on the t-SNE  
143 method to identify the main cell groups for all samples. In the subgroup cell  
144 identification, the top 10 PCAs were applied for the graph based clustering. The cells  
145 in each integrated subcluster were selected to run the SCTransformation analysis with  
146 the cells being categorized with the top ranked, differentially expressed genes and the  
147 well-known cellular biomarkers. The osteoclast cell biomarkers were defined as the  
148 cathepsin K5(CTSK5) and tartrate-resistant acid phosphatase(TRAP/ACP5);  
149 cadherin11(CDH11), Integrin Binding Sialoprotein (IBSP) for osteoblast cells;  
150 lumican(LUM), decorin(DCN), collagen, type I, alpha 1(COL1A1) for fibroblast;  
151 CD74, CD68 for monocytes; CD2, natural killer cell granule protein 7(NKG7) and  
152 CD3D for T and NK cells.

### 153 **Differential expressed genes(DEG) identification and Gene Ontology(GO)** 154 **enrichment analysis**

155 The cluster subgroup specific biomarkers were identified with the FindAllmarkers  
156 functions implemented in the Seurat package based on the normalized gene  
157 expression data. The genes with the adjusted P-values < 0.05 between the clusters  
158 were defined as DEGs and were selected for the GO enrichment analysis using the  
159 ClusterProfiler package of R.

### 160 **CNV estimation in the OS tumor**

161 Initial CNVs for each region were estimated by inferCNV R package. The CNVs of  
162 total cell types were calculated by expression level from single-cell sequencing data  
163 for each cell with `-cutoff 0.1` and `-noise_filter 0.2`. For each sample, gene expression  
164 of cells was re-standardized and values were limited as `-1` to `1`.

### 165 **Construction of single cell trajectories of OS cells**

166 To identify genes that were involved in the progression of OS cells, the Monocle2  
167 package (v2.8.0) was used to analyze single cell trajectories from primary tumor to the  
168 lung metastasis or recurrence. We used top 100 differentially expressed genes across  
169 the cell types identified by the Monocle 2 to sort the cells in pseudo-time order. The

170 gene expression files in the primary cells were defined as the root\_stage and the  
171 DDRTree was applied to reduce the dimensions and visualize the plot\_cell\_trajectory  
172 functions implemented in the monocle2. Differentially expressed genes over the  
173 Pseudo-time from primary tumor to lung metastasis or recurrent were calculated by  
174 the “differentialGeneTest” function in Monocle2 (q value <  $10^{-20}$ ). The genes were  
175 categorized into 6 subgroups and the GO function enrichment analysis was performed  
176 for the genes in each cluster with the ClusterProfile package of R.

### 177 **Immunohistochemistry(IHC) staining and immunofluorescence(IF) staining**

178 Tissue sectioning and IHC staining of formalin fixed paraffin-embedded (FFPE) OS  
179 specimens were performed following the general methods. All sections were  
180 deparaffinized, rehydrated, and washed and endogenous peroxidase was blocked using 3%  $H_2O_2$   
181 for 10 min, the slides were incubated with primary antibodies followed by  
182 HRP-linked secondary antibodies and diaminobenzidine (DAB; ZhongShan Golden  
183 bridge biotechnology Co LTD, Cat No. ZLI-9018) staining. Counterstaining was done  
184 with hematoxylin. Slides were dehydrated with sequential ethanol washes for 1 min  
185 each starting with 75%, followed by 80% and finishing with a 100% ethanol wash.  
186 Two physicians blinded for clinical/tumor-characteristics independently assessed  
187 IHC-staining for TIGIT, CD3, CD4, CD8, CD74 and CTSK.

188 For IF staining, the process was same to above until incubating with primary  
189 antibodies overnight at 4°C. Fluorescence-labeling secondary antibodies including  
190 donkey anti-rabbit Alexa Fluor488 (Molecular Probes, catalog A21202, 1:1000) and  
191 goat anti-mouse Alexa Fluor 514nm (Molecular Probes, catalog A31555, 1:1000)  
192 were incubated for 1 hour at room temperature after washing. Nuclei were  
193 counterstained with DAPI (MilliporeSigma, D9542). Sections were mounted using  
194 fluorescence mounting medium (Dako, S3023).

### 195 **Cytotoxicity assays by CytoTox 96® Non-Radioactive Cytotoxicity Assay**

196 PBMCs were collected from BC3 and BC16 by density centrifugation using  
197 Lymphocyte Separation Medium (MP Biomedicals). Then CD3+ T cells were isolated  
198 using the MACS positive selection technology (Miltenyi Biotec) according to the  
199 manufacturer’s protocol. For T-cell activation assays, CD3+ cells were seeded in  
200 24-well plates and stimulated with IFN- $\gamma$ (1000 U/mL; Peprotech), IL-2 (600 U/mL,  
201 Peprotech) and anti-CD3 antibody (5 ng/mL, clone OKT3; Biolegend) for 3 days then  
202 blocked TIGIT with TIGIT antibodies(50  $\mu$ g/ml, clone #A15153G, Biolegend) for

203 24h. 143B and U2OS cells were seed in 96-well plates overnight, then added CD3+ T  
204 cell at effector-to-target (E:T) ratios of 4:1 and 8:1. Co-culture system were incubated  
205 for 8 h. The supernatant was harvested and was subjected to analysis by the CytoTox  
206 96® Non-Radioactive Cytotoxicity Assay. The killing effect of T cells against target  
207 cells was assessed with the following equation: Cytotoxicity = (Experimental –  
208 Effector Spontaneous – Target Spontaneous)/(Target Maximum–Target Spontaneous)  
209 × 100%. All experiments were performed at least three times.

## 210 **Statistical analysis**

211 Statistical analysis was performed using statistics package for social science 21.0  
212 (SPSS 21.0; SPSS Inc, Chicago, IL). All the data were expressed as mean±SD. The  
213 significance was determined by the t test.  $p < 0.05$  was considered statistically  
214 significant.

## 215 **Results**

### 216 **Single-cell analysis uncovers the complexity of OS tumor**

217 To explore the cellular compositions in OS, we performed scRNA-seq analysis of 7  
218 primary OS tumors, plus 2 recurrent OS tumors, and 2 samples from pulmonary  
219 metastasis (Table 1). After initial quality control, we acquired single-cell  
220 transcriptomes in a total of 110,745 cells, including 72,004 cells from *in situ* samples,  
221 19,439 cells from lung metastasis samples, and 19,302 cells from recurrence samples.  
222 We first applied principle component analysis on variably expressed genes across all  
223 cells and identified six main cellular clusters including OS (osteoblast cell, 47,598),  
224 osteoclast cell (9,180), fibroblast (26,772), myeloid cell (18,158), endothelial (3,621)  
225 and T/NK cell (5,416) based on the t-distributed stochastic neighbor embedding  
226 (t-SNE) analyses in two dimensions (Fig. 1A). The t-SNE results for individual  
227 patients were shown in Supplementary Fig. S1. We performed the differential  
228 expression analysis to identify the cellular cluster-specific genes and defined the  
229 cellular cluster together with the well-known cellular biomarkers. The dot-plot and  
230 violin-plot showed the well-known cell type-specific markers embedded in cells from  
231 distinct clusters (Fig. 1B and C). The heatmap gathered the well-known cell type  
232 markers to distinguish each cell cluster, such as CTSK, ACP5 for osteoclast, CDH11  
233 and BSP for malignant osteoblast, which we defined here as OS cell.

### 234 **Intra-tumoral heterogeneity in malignant OS cells**

235 With the t-SNE analysis of osteoblast OS cells, we identified 5 distinct subgroups,  
236 named as metabolic, proliferating, extracellular matrix remodeling, ossification and  
237 cellular differentiation cells, respectively (Fig. 2A). Based on the GO analysis, cluster  
238 1 was enriched in genes related to structural constituent of ribosome, glycolysis and  
239 active lipid metabolism and therefor termed as metabolic OS cells. Cluster 2 was  
240 enriched in genes related to cell cycle and proliferating with relatively higher  
241 expression of Ki67 and TOP2A and termed as proliferating OS cells. Cluster 3 was  
242 enriched with genes related to extracellular matrix modeling and therefor defined as  
243 ECM modeling OS cells. Genes in cluster 4 had a high level of genes involved in  
244 sulfur compound binding, heparin binding and glycosaminoglycan binding pathway,  
245 suggesting it was associated with ossification and therefor defined as ossification.  
246 Cells in cluster 5 were specific in cell differentiation processes including histone  
247 acetyltransferase binding, RNA polymerase II transcription factor binding and  
248 DNA-binding transcription activator activity. Many transcription factors, such as  
249 JUN, MYC, SOX9, etc, were over-expressed, suggesting that they may be pluripotent  
250 (Fig. 2B), and the cells were defined as cellular differential OS cells. The KEGG  
251 analysis showed that the genes of TP53 pathway were markedly disordered in  
252 subgroup 5 (Fig. S2A). The heatmap displayed the key genes characterizing our  
253 classification (Fig. S2 B).

254 To address the origin differentiation, development and stemness of OS, we  
255 performed the trajectory analysis of OS cells(Fig. 2D). Firstly we evaluated the genes  
256 that expressed along with the pseudo-time in primary OS cells. It is uncertain which  
257 cell type is responsible for OS initiation. Our data imply that in the primary OS tissue,  
258 the highly proliferating OS cells would transit to the differentiation cells with  
259 transcription factor including, over-expression and then transform to special potential  
260 cells including hypermetabolism, bone matrix remodeling and ossification. We further  
261 analyzed the gene patterns along with the cellular trajectories, and the genes were  
262 subclustered into 4 groups. The GO analysis suggested that the genes related to  
263 mitotic nuclear division were down-regulated along with the trajectory while genes  
264 related to regulation of ossification and bone morphogenesis were increased along  
265 with the trajectory.

266 Secondly, we performed the cellular trajectories from primary to lung  
267 metastasis. In the lung metastasis, the genes were categorized into 6 clusters, with the  
268 genes related to cellular matrix being significantly down-regulated, while the genes



269 related to mitotic nuclear division, organelle fission, RNA catabolic process, nuclear  
270 transcribed mRNA catabolic process nonsense mediated decay and cotranslational  
271 protein targeting to membrane *etc.* were significantly increased. Furthermore, ten  
272 transcriptional factors, including (SRY-like HMG box) SOX2, TP73, and homeobox  
273 gene family D11 (HOXD11) *etc.*, were significantly increased in the lung  
274 metastasized cells, suggesting that they play important roles in lung metastasis of OS  
275 cells.

276 Thirdly, we explored the cellular trajectories from primary to recurrent OS cells.  
277 The genes in response to IFN $\gamma$  were reduced while genes related to the connective  
278 tissue were significantly increased. Thirty-one transcriptional factors, including MYC,  
279 FOS, ORF of iroquois homeobox 1 (IRX5) and JUNB *etc.*, were significantly  
280 increased in the local tumor recurrence, suggesting that they play vital roles in the  
281 diseases recurrence.

282 We also calculated large-scale chromosomal CNV in each subject based on  
283 averaged expression patterns across intervals of the genome (Fig. S3). We found that,  
284 while the genomic region of 8q was frequently increased in the OS cells, 6p region  
285 was frequently down-regulated, which were in consistent with previous studies  
286 performed with the CGH methods[20].

### 287 **From antigen presenting to bone resorption during the OC maturation**

288 The bone or bone-like microenvironment/niches provide growth and survival signals  
289 essential for OS initiation and progression. OC is an important type of cells to  
290 maintain the balance of bone formation. Previous studies suggested that OC cells  
291 express immune regulators, uptake soluble antigens and secrete cytokine to activate  
292 both CD4<sup>+</sup> and CD8<sup>+</sup> T cells in an MHC-restricted fashion[21]. Mature osteoclast  
293 (OC) is a type of poly-nuclear cell involved in the bone resorbing. We hypothesize  
294 whether the function of OCs dynamic change with development. Here we divided the  
295 OC cells into 3 main subgroups based on the integration data, including progenitor  
296 OC, immature OC and mature OC cells(Figure 3A) The progenitor OC cells showed  
297 relatively higher CD74 and the topoisomerase II $\alpha$  (TOP2A), while the mature OC  
298 cells displayed higher expression of CTSK and ACP5 (Fig. 3B). The cellular  
299 trajectory analysis is consistent with our hypothesis that the cells with higher CD74  
300 expression level were ranked at the origin of the pseudo-time linkage while the  
301 expression of CTSK and ACP5 were increased along with the pseudo-time(Fig. 3C).

302 The primary function of CD74 is regulation of T-cell and B-cell developments,  
303 dendritic cell (DC) motility, macrophage inflammation, and thymic selection[22]. In  
304 addition CD74 can act as a receptor for macrophage migration inhibitory factor (MIF).  
305 It was found that MIF inhibited osteoclast formation and CD74 knockout (KO) mice  
306 had decreased bone mass[23]. We detected the CD74 and CTSK co-expression in  
307 OCs by IHC method on serial section. We found the cells with CD74 extreme positive  
308 were small and mononuclear with weakly positive of CTSK. The CD74 level in  
309 multinuclear OCs presenting light brown was markedly lower than in mononuclear  
310 OCs(Fig. 3D). The IF results were equal to IHC(Fig. S5). This result also indicated  
311 that the antigen presentation function of OC fade away with its development.

312 Furthermore, we analyzed the gene change in 25 GO biological process  
313 categories. The genes related to antigen processing and presentation via MHC class  
314 IB, aminoglycan catabolic process, collagen fibril organization *etc*, showed a  
315 significant increase along with the differentiation of OC cells, while the genes related  
316 to sequestering of metal ion, bone mineralization, extra cellular structure organization  
317 *etc*, were down-regulated with the differentiation (Fig. 3E, Fig. 3F). For our opinion,  
318 along with the differentiation of OC, the antigen presenting function was diminishing,  
319 while the bone resorption function became stronger and stronger. The deficiency of  
320 progenitor OC in metastasis and recurrent OS tissue may contribute to the  
321 immunosuppressed state.

### 322 **Distincted capCAFs in OS**

323 CAFs modulate tumor stiffness and facilitate cancer progression. Based on the  
324 reported CAF biomarkers including lumican(LUM), collagen type I alpha 1  
325 chain(COL1A1) and decorin(DCN), a total of 18,158 fibroblast cells were identified.  
326 These fibroblast cells were categorized into two distinct subclusters (Fig. 4A),  
327 including myofibroblastic CAFs (myCAFs) with periglandular FAP+  $\alpha$ SMA<sup>high</sup> and  
328 apCAFs with high level of MHC class II family members [24]. Compared to the  
329 myCAFs, the apCAFs showed relative higher expression level of CD74 and the MHC  
330 II molecules while the expression level of DCN and LUM was relatively lower (Fig.  
331 4B). We then generated the heatmap according to cluster-specific marker genes by  
332 performing differential gene expression analysis to define the identity of each cell  
333 cluster (Fig. 4C). It's worth noting the apCAFs were frequently identified in the  
334 primary tissue (1335/4587), but rarely noted in the metastasis (226/5000) and the  
335 recurrent tumors (452/5217), implying the antigen presenting was more active in

336 primary OS tissue.

### 337 **Functional analysis of the myeloid cells in OS**

338 Tumor-infiltrating myeloid cells are the most abundant monocyte population within  
339 tumors and known for their functional and molecular plasticity. In this paper, we  
340 identified 7 subgroups of the myeloid cells, including the M1-like macrophage,  
341 M2-like macrophage, IFN activated macrophage, CD14+ monocyte, DC, proliferating  
342 myeloid cells and neutrophil cells (Fig. 5A). Each subgroup of the myeloid cells had  
343 distinctive biomarkers, which were shown in violin-plot (Fig. 5 B).

344 Tumor-associated macrophages (TAMs) are the major immune component of  
345 myeloid cells in OS. The majority of the TAMs have relatively higher expression  
346 level of CD163 and mannose scavenger receptor(MRC1)/CD206, suggesting that  
347 these cells were M2-polarized TAMs in OS (Fig. 5 C). The TAMs were clustered into  
348 3 subgroups. The first group was the M1-like TAMs expressing a relatively higher  
349 level of pro-inflammatory markers including C-C motif chemokine ligand 2(CCL2),  
350 CCL3, CCL4, CXC motif chemokine ligand 2(CXCL2) and CXCL3. The main  
351 ingredient was M2-like TAMs with relatively higher expression of inflammatory  
352 biomarkers including IL-10. We also found the IFN activated macrophage, which was  
353 characterized with higher expression levels of IFN-induced proteins with  
354 tetrapeptide repeat 1(IFIT1), IFIT2 and IFIT3, suggesting that the activation of  
355 IFN signaling pathway may contribute to the tumor suppressive microenvironment  
356 (Fig. 5D). Our data imply OS is abundant in M2-like immunosuppressive TAMs.

### 357 **Contribution of the immune-suppressive tumor-infiltrating Lymphocyte(TIL) 358 cells to OS**

359 The presence and content of TILs is considered to be closely related with response to  
360 the immunotherapy[25]. Here we characterized the subpopulations of TIL using  
361 transcriptomic patterns. According to the analysis, the major groups of the lymphoid  
362 cells included CD4-/CD8- T cells, CD8+T cells, NK cells, T-reg cells, mast cells and  
363 plasma cells (Fig.6A). The lymphoid cells were the majority in the primary tumor and  
364 the lung metastatic tumor. In contrast, they were rarely noted in the recurrence tumor  
365 samples. Most of the T cells in the primary OS tumor were CD4-/CD8- T and Treg  
366 cells. In the lung metastasis, about 311 out of the 1969 T cells were T-reg cells.  
367 Meanwhile, the cellular distribution of NK cells and the CD8+T cells were  
368 significantly reduced in the lung metastatic tumors. Using the IHC method (Fig. 6B),

369 we validated the cellular composition of the lymphoid cells, and found that cytotoxic  
370 CD8+T cells barely existed in the recurrent and lung metastatic tumors. Our results  
371 suggested the cytotoxicity of T cells is loss-of-function in the OS tumor, especially in  
372 recurrent and metastatic tissue.

373 We performed the dot-plot analysis to display the level of marker genes in all  
374 kinds of cells (Fig. 6C). The GZMB expression level was reduced, suggesting that  
375 CD8+T cells in the OS cells had lower cytotoxic activities. The cellular composition  
376 of the T-reg cells was significantly increased, and the T-reg cells expressed relatively  
377 higher levels of cytotoxic T-lymphocyte-associated protein 4(CTLA-4) and TIGIT,  
378 which are negative regulator for the cytotoxicity of the CD8+T cells (Fig. 6D).

### 379 **Blocking TIGIT improved the cytotoxicity of Cytokine induced T cells (CITs) to** 380 **OS cells**

381 TIGIT is expressed normally by activated T cells, regulatory T cells (Treg), and  
382 natural killer (NK) cells, which is recently emerging as novel candidate in  
383 immunotherapy. As mentioned above, we show for the first time that the TIGIT  
384 over-expressed on TILs of OS patients by scRNA-seq. It was verified by IHC  
385 method(Fig. 7A). In order to demonstrate the therapeutic potential of TIGIT in OS,  
386 We isolated the CD3+ T cell and blocked the inhibitory activity of TIGIT. The  
387 immune cell-mediated lysis of CITs on OS cells was measurably enhanced by the  
388 addition of blocking TIGIT antibodies in co-culture system( $p<0.05$ , Fig. 7B).

### 389 **Discussion**

390 WES/WGS data or transcriptomic results had described OS is a highly  
391 inter-heterogeneous tumor[26]. However, they are only reflecting the average of  
392 expression levels across the tumor cells. As such, these studies could not identify cell  
393 types, nor predict developmental trajectories, clarify taxonomic composition and  
394 metabolic capacities of TME. In the present study, we applied scRNA-seq strategy to  
395 profile malignant cells and TME components from primary, recurrent and lung  
396 metastatic OS tissues. To our knowledge, this paper is the first study which performed  
397 scRNA-seq to identify the intra-heterogeneous of OS. Thus, how to identify the OS  
398 cells is most important. Han et al proposed that Ctsk+ cells serve as a physiologic and  
399 pathological precursor in osteogenic tumor[27-29], and we chose it as one of the  
400 major indicators. Meanwhile, bone sialoprotein (BSP) is thought to function in the  
401 initial mineralization of bone and selectively expresses by differentiated

402 osteoblast[30]. Here, the OS cells were characterized using CDH11, BSP, LUM, DCN  
403 and COL1A1 as markers.

404 In the subgroup analysis, we put emphasis on the subtype 5 enriching in multiple  
405 singling pathways related to cancer development and other transcriptional  
406 misregulation signaling pathways. Meanwhile, the genes related to p53 downstream  
407 signaling pathways were significantly enriched in the subcluster. As we know, TP53  
408 and Rb1 exhibited the most frequent mutations in OS, which may be the initiating  
409 factors for OS tumorigenesis[30]. The OS cells with TP53 mutation exhibit a high  
410 chromosomal instability and lead to secondary genetic aberrations in new cancer cell  
411 clones that emerged from the initial monoclonal [31]. A large number of animal  
412 models are developed for osteosarcoma, including P53 knock out mouse model [32].  
413 Based on our cellular trajectory analysis, the precursor of OS is highly proliferative. It  
414 is widely accepted that the stem cell could renew but being at G0 stage with  
415 proliferative inactivity. We were unable to capture the stem cells, probably due to  
416 their extremely low number. In our opinion, the differentiation subtype may be the  
417 secondary genetic aberrations, which would then transform to special metabolism,  
418 bone matrix remodeling and ossification subtypes. We hypothesize that the  
419 components in our paper behave just like myeloblast, promyelocyte and so on, thus  
420 presenting the hematopoietic cell differentiation and development processes. Of  
421 course more research is necessary to further explore this hypothesis.

422 Emerging immune checkpoint inhibitors have been the landmark treatments for  
423 their clinical success in a variety of human cancers. However, the therapeutic  
424 efficacies by immune checkpoint inhibitors were variable for the treatment of OS  
425 patients[33,34]. Gomez-Brouchet et al. reported that PD1/PDL-1 staining was  
426 negative in >80% of OS cases (n=124) [35]. Alves showed that OSJ displayed a  
427 microenvironment with low tumor infiltrating lymphocytes (TILs), and few cells  
428 exhibited immunotherapeutic targets CTLA-4 and PD-1[36]. Palmerini examined the  
429 TAMs by primary OS tissue microarray to evaluate the status of the  
430 immune-infiltrates in OS. Most cases presented TILs, which contained CD3+ (90%)  
431 and CD8+ (86%). Meanwhile, PD-L1 expression was found in 14% patients in  
432 immune-cells and 0% in tumoral cells [37]. Our results were consistent with theirs:  
433 low cytotoxic TILs were usually in OS and the level of PD-L1 was so low that it  
434 could not be detected in OS tissue. On the contrary, some previous studies on OS

435 samples reported a higher rate of positive expression of PD-L1 (IC), ranging from 25%  
436 to 74% [38,39]. We reason that these variant conclusions could be ascribed to  
437 insufficient statistical samples and different agents. In order to comprehensively  
438 predict the validity of ICIs, more indicators are required.

439 Wang reported that metastatic OS tumors showed improved immunogenicity.  
440 But most of TILs in lung metastasis were the naïve T cells or T-regs with lower  
441 anti-cancer activities[40]. These results thus appeared inconsistent. In our research,  
442 we found that the immunosuppression of lung metastasis tissue was more significant  
443 with the higher percentage of T-reg cells. In fact, it is controversial whether metastatic  
444 OS tumor was immunogenic. Our view is that significant immunophenotypic  
445 disturbances were found in recurrent and metastatic tissues, with immune-cells being  
446 rarely noted in recurrence OS tissue. Our data suggested that the OS immune  
447 environment became “cool” in the recurrent OS tumor. Thus, we initiated the clinical  
448 trial NCT03676985 using anti-PD-L1 as maintenance after adjuvant chemotherapy.

449 Another key finding of our paper is that the T-reg cells had a relatively higher  
450 TIGIT expression level in OS tumor. TIGIT and its ligand poliovirus receptor (PVR)  
451 have been emerging as novel promising targets in immunotherapy for many tumors  
452 such as breast cancer, lung cancer, hepatocellular carcinoma etc[41-43]. Tian reported  
453 that blockade of TIGIT prevented NK cell exhaustion and elicited potent anti-tumor  
454 immunity[44]. In the current study, we observed that the T-reg cells had relatively  
455 higher TIGIT expression level in OS tumor and blockade of TIGIT improved the  
456 cytotoxicity of CIT, which suggested that OS patients may benefit from  
457 individualized immunotherapy according to the genetic results.

458 TAMs are known to participate in tumor initiation, progression and metastasis.  
459 We found that the majority of the TAMs have relatively higher CD206 and MRC1  
460 expression, suggesting that TAMs were M2-type with anti-inflammatory activities in  
461 OS tumor. Interestingly, we also observed a subgroup of TAMs with relatively higher  
462 expression level of inflammatory factors including CCL3, CCL4, CXCL8 etc.,  
463 suggesting that the inflammatory activities may be involved in the tumorigenesis and  
464 progression of OS tumor. Our scRNA-seq analysis displayed the dynamic  
465 development of TAMs, which was consistent with previous studies reported by  
466 Dumars et al. that M2-macrophages were dominated in OS tissue and that  
467 macrophage dyspolarization was associated with metastatic process in OS patients  
468 [45]. In this regard, our data seems to offer some hints as to why the mifamurtide, a

469 fully synthetic lipophilic derivative of the muramyl dipeptide (MDP) encapsulated  
470 into liposomes, was effective when used together with chemotherapy for localized OS;  
471 hence, the addition of mifamurtide was preferred in non-metastatic OS patients,  
472 whereas there was no significant difference in overall survival rates between the  
473 combined use of mifamurtide with chemotherapy and chemotherapy alone in  
474 metastatic OS [46].

475 In recent years, CAFs have attracted attention due to their role in mediating  
476 collagen crosslinking with malignant cells by disintegrating metalloproteinases  
477 (ADAMs) and secreting multiple cytokines, chemokines and growth factors[47].  
478 Meanwhile, CAFs assist cancer cells in evading immune surveillance through  
479 inhibiting the activity of immune-effector cells and recruiting immune-suppressive  
480 cells, thus supporting cancer tumorigenesis and metastasis[48]. However, the role of  
481 the CAFs in driving tumorigenesis of OS remains to be further elucidated. As  
482 mentioned above, Elyada et al[49] described a new population of CAFs that displayed  
483 relatively higher expression of MHC class II and CD74 without the expression of  
484 classic costimulatory molecules, and they named it "antigen-presenting CAFs". In our  
485 study, we also isolated two subtypes of CAFs, apCAF and the traditional myCAF.  
486 Previous studies suggested that apCAF could activate CD4+ T cells and act as the  
487 immune-modulator [50]. We found the ratio of apCAF/myCAF in primary tumor  
488 tissue was dramatically higher than that in pulmonary metastatic and recurrent tumor  
489 tissues, suggestive of the difference of the TME of OS in the primary *versus* the  
490 metastatic tumor. Nonetheless, more studies are warranted to address the origin of the  
491 apCAF and their roles in the OS progression and development.

492 In summary, using the scRNA-seq method, our study uncovers the  
493 intra-heterogeneity of both malignant OS cells and the TME. Distinct subgroups of  
494 OS cells were documented and the cellular lineage in lung metastasis of OS were  
495 determined. Furthermore, the main immune cell types in the TME were profiled.  
496 Together, our findings in the present study may provide novel therapeutic targets and  
497 methods for the treatment of OS patients.

#### 498 **ACKNOWLEDGMENTS**

499 We thank all the patients who contributed to this study. We also thanks the Hengrui  
500 pharmaceutical co. LTD due to providing the antibody of TIGIT and CTSK for free.

#### 501 **Reference**

- 502 1) Pingping B, Yuhong Z, Weiqi L, Chunxiao W, Chunfang W, Yuanjue S, Chenping Z, Jianru  
503 X, Jiade L, Lin K, Zhengdong C, Weibin Z, Chen F, Yang Y. Incidence and Mortality of  
504 Sarcomas in Shanghai, China, During 2002-2014. *Front Oncol*. 2019 Jul 17;9:662.
- 505 2) Lancia C, Anninga JK, Sydes MR, Spitoni C, Whelan J, Hogendoorn PCW, Gelderblom H,  
506 Fiocco M. A novel method to address the association between received dose intensity  
507 and survival outcome: benefits of approaching treatment intensification at a more  
508 individualised level in a trial of the European Osteosarcoma Intergroup. *Cancer Chemother  
509 Pharmacol*. 2019 May;83(5):951-962.
- 510 3) Siegel RL, Miller KD, Jemal A. Cancer statistics, 2018. *CA Cancer J Clin*. 2018  
511 Jan;68(1):7-30.
- 512 4) Máire A. Duggan, William F. Anderson, Sean Altekruze, Lynne Penberthy, Mark E. Sherman.  
513 The surveillance, Epidemiology and End Results(SEER) Program and Pathology: Towards  
514 Strengthening the Critical Relationship. *Am J Surg Pathol*. Author manuscript; available in  
515 PMC 2017 Dec 1. Published in final edited form as: *Am J Surg Pathol*. 2016 Dec; 40(12):  
516 e94–e102.
- 517 5) Dean DC, Shen S, Hornicek FJ, Duan Z. From genomics to metabolomics: emerging  
518 metastatic biomarkers in osteosarcoma. *Cancer Metastasis Rev*. 2018 Dec;37(4):719-731.
- 519 6) Matthew D. Hellmann, Tavi Nathanson, Hira Rizvi, Benjamin C. Creelan, Francisco  
520 Sanchez-Vega, Arun Ahuja, Ai Ni, Jacki B. Novik, Levi M.B. Mangarin, Mohsen Abu-Akeel,  
521 Cailian Liu, Jennifer L. Sauter, Natasha Rekhtman, Eliza Chang, Margaret K. Callahan,  
522 Jamie E. Chaft, Martin H. Voss, Megan Tenet, Xue-Mei Li, Kelly Covello, Andrea  
523 Renninger, Patrik Vitazka, William J. Geese, Hossein Borghaei, Charles M. Rudin, Scott J.  
524 Antonia, Charles Swanton, Jeff Hammerbacher, Taha Merghoub, Nicholas McGranahan,  
525 Alexandra Snyder, Jedd D. Wolchok. Genomic Features of Response to Combination  
526 Immunotherapy in Patients with Advanced Non-Small-Cell Lung Cancer. *Cancer Cell*. 2018  
527 May 14; 33(5): 843–852.
- 528 7) Hiro Sato, Atsuko Niimi, Takaaki Yasuhara, Tiara Bunga Mayang Permata, Yoshihiko  
529 Hagiwara, Mayu Isono, Endang Nuryadi, Ryota Sekine, Takahiro Oike, Sangeeta Kakoti,  
530 Yuya Yoshimoto, Kathryn D. Held, Yoshiyuki Suzuki, Koji Kono, Kiyoshi Miyagawa,  
531 Takashi Nakano, Atsushi Shibata. DNA double-strand break repair pathway  
532 regulates PD-L1 expression in cancer cells. *Nat Commun*. 2017; 8: 1751. Published online  
533 2017 Nov 24. doi: 10.1038/s41467-017-01883-9.
- 534 8) Le Cesne A, Marec-Berard P, Blay JY, Gaspar N, Bertucci F, Penel N, Bompas E, Cousin  
535 S, Toulmonde M, Bessede A, Fridman WH, Sautes-Fridman C, Kind M, Le Loarer F, Pulido  
536 M, Italiano A. Programmed cell death 1 (PD-1) targeting in patients with advanced  
537 osteosarcomas: results from the PEMBROSARC study. *Eur J Cancer*. 2019  
538 Sep;119:151-157.



- 539 9) Thanindrarn P, Dean DC, Nelson SD, Hornicek FJ, Duan Z. Advances in immune  
540 checkpoint inhibitors for bone sarcoma therapy. *J Bone Oncol*. 2019 Jan 29;15:100221.
- 541 10) Davoli T, Uno H, Wooten EC, Elledge SJ. Tumor aneuploidy correlates with markers of  
542 immune evasion and with reduced response to immunotherapy. *Science (New York, NY)*.  
543 2017. 355:6322.
- 544 11) Schiavone K, Garnier D, Heymann MF, Heymann D. The Heterogeneity of Osteosarcoma:  
545 The Role Played by Cancer Stem Cells. *Adv Exp Med Biol*. 2019;1139:187-200.
- 546 12) Wang D, Niu X, Wang Z, Song CL, Huang Z, Chen KN, Duan J, Bai H, Xu J, Zhao J, Wang  
547 Y, Zhuo M, Xie XS, Kang X, Tian Y, Cai L, Han JF, An T, Sun Y, Gao S, Zhao J, Ying J,  
548 Wang L, He J, Wang J. Multiregion Sequencing Reveals the Genetic Heterogeneity and  
549 Evolutionary History of Osteosarcoma and Matched Pulmonary Metastases. *Cancer Res*.  
550 2019 Jan 1;79(1):7-20.
- 551 13) Schiavone K, Garnier D, Heymann MF, Heymann D. The Heterogeneity of Osteosarcoma:  
552 The Role Played by Cancer Stem Cells. *Adv Exp Med Biol*. 2019;1139:187-200.
- 553 14) Bousquet M, Noirot C, Accadbled F, Sales de Gauzy J, Castex MP, Brousset P,  
554 Gomez-Brouchet A. Whole-exome sequencing in osteosarcoma reveals  
555 important heterogeneity of genetic alterations. *Ann Oncol*. 2016 Apr;27(4):738-44.
- 556 15) Chen X, Bahrami A, Pappo A, Easton J, Dalton J, Hedlund E, Ellison D, Shurtleff S, Wu G,  
557 Wei L, et al. Recurrent somatic structural variations contribute to tumorigenesis in pediatric  
558 osteosarcoma. *Cell Rep*. 2014. 7(1):104–112.
- 559 16) Sun H, Liu L, Huang Q, Liu H, Huang M, Wang J, Wen H, Lin R, Qu K, Li K, Wei H, Xiao  
560 W, Sun R, Tian Z, Sun C. Accumulation of Tumor-Infiltrating CD49a+ NK Cells Correlates  
561 with Poor Prognosis for Human Hepatocellular Carcinoma. *Cancer Immunol Res*. 2019  
562 Sep;7(9):1535-1546.
- 563 17) Josefsson SE, Beiske K, Blaker YN, Førsund MS, Holte H, Østenstad B, Kimby E, Kõksal  
564 H, Wälchli S, Bai B, Smeland EB, Levy R, Kolstad A, Huse K, Myklebust JH. TIGIT and  
565 PD-1 Mark Intratumoral T Cells with Reduced Effector Function in B-cell Non-Hodgkin  
566 Lymphoma. *Cancer Immunol Res*. 2019 Mar;7(3):355-362.
- 567 18) Dixon KO, Schorer M, Nevin J, Etminan Y, Amoozgar Z, Kondo T, Kurtulus S, Kassam  
568 N, Sobel RA, Fukumura D, Jain RK, Anderson AC, Kuchroo VK, Joller N. Functional  
569 Anti-TIGIT Antibodies Regulate Development of Autoimmunity and Antitumor Immunity.  
570 *J Immunol*. 2018 Apr 15;200(8):3000-3007.
- 571 19) Andrews LP, Yano H, Vignali DAA. Inhibitory receptors and ligands beyond PD-1, PD-L1  
572 and CTLA-4: breakthroughs or backups. *Nat Immunol*. 2019 Nov;20(11):1425-1434.
- 573 20) Atiye J, Wolf M, Kaur S, Monni O, Böhling T, Kivioja A, Tas E, Serra M, Tarkkanen  
574 M, Knuutila S. Gene amplifications in osteosarcoma-CGH microarray analysis. *Genes  
575 Chromosomes Cancer*. 2005 Feb;42(2):158-63.
- 576 21) Li H, Hong S, Qian J, Zheng Y, Yang J, Yi Q. Cross talk between the bone and immune  
577 systems: osteoclasts function as antigen-presenting cells and activate CD4+ and CD8+ T cells.

- 578 Blood. 2010 Jul 15;116(2):210-7.
- 579 22) Mun SH, Won HY, Hernandez P, Aguila HL, Lee SK. Deletion of CD74, a putative MIF  
580 receptor, in mice enhances osteoclastogenesis and decreases bone mass. *J Bone Miner*  
581 *Res.* 2013 Apr;28(4):948-59.
- 582 23) Hu G, Cheng Z, Wu Z, Wang H. Identification of potential key genes associated  
583 with osteosarcoma based on integrated bioinformatics analyse. *J Cell Biochem.* 2019  
584 Aug;120(8):13554-13561.
- 585 24) Peng J, Sun BF, Chen CY, Zhou JY, Chen YS, Chen H, Liu L, Huang D, Jiang J, Cui GS,  
586 Yang Y, Wang W, Guo D, Dai M, Guo J, Zhang T, Liao Q, Liu Y, Zhao YL, Han DL, Zhao Y,  
587 Yang YG, Wu W. Single-cell RNA-seq highlights intra-tumoral heterogeneity and malignant  
588 progression in pancreatic ductal adenocarcinoma. *Cell Res.* 2019 Sep;29(9):725-738.
- 589 25) Torabi A, Amaya CN, Wians FH Jr, Bryan BA. PD-1 and PD-L1 expression in bone and soft  
590 tissue sarcomas. *Pathology.* 2017 Aug;49(5):506-513.
- 591 26) Kansara M, Thomas DM. Molecular pathogenesis of osteosarcoma. *DNA Cell Biol.* 2007  
592 Jan;26(1):1-18.
- 593 27) Han Y, Feng H, Sun J, Liang X, Wang Z, Xing W, Dai Q, Yang Y, Han A, Wei Z, Bi Q, Ji  
594 H, Kang T, Zou W. Lkb1 deletion in periosteal mesenchymal progenitors induces osteogenic  
595 tumors through mTORC1 activation. *J Clin Invest.* 2019 May 1;129(5):1895-1909.
- 596 28) Debnath S, Yallowitz AR, McCormick J, Lalani S, Zhang T, Xu R, Li N, Liu Y, Yang  
597 YS, Eiseman M, Shim JH, Hameed M, Healey JH, Bostrom MP, Landau DA, Greenblatt MB.  
598 Discovery of a periosteal stem cell mediating intramembranous bone formation. *Nature.* 2018  
599 Oct;562(7725):133-139.
- 600 29) Chan CK, Seo EY, Chen JY, Lo D, McArdle A, Sinha R, Tevlin R, Seita  
601 J, Vincent-Tompkins J, Wearda T, Lu WJ, Senarath-Yapa K, Chung MT, Marcic O, Tran  
602 M, Yan KS, Upton R, Walmsley GG, Lee AS, Sahoo D, Kuo CJ, Weissman IL, Longaker  
603 MT. Identification and specification of the mouse skeletal stem cell. *Cell.* 2015 Jan  
604 15;160(1-2):285-98.
- 605 30) Suehara Y, Alex D, Bowman A, Middha S, Zehir A, Chakravarty D, Wang L, Jour G, Nafa K,  
606 Hayashi T, Jungbluth AA, Frosina D, Slotkin E, Shukla N, Meyers P, Healey JH, Hameed M,  
607 Ladanyi M. Clinical Genomic Sequencing of Pediatric and Adult Osteosarcoma Reveals  
608 Distinct Molecular Subsets with Potentially Targetable Alterations. *Clin Cancer Res.* 2019  
609 Nov 1;25(21):6346-635.
- 610 31) Osumi T, Miharuru M, Fuchimoto Y, Morioka H, Kosaki K, Shimada H. The  
611 germline TP53 mutation c.722 C>T promotes bone and liver tumorigenesis at a young age.  
612 *Pediatr Blood Cancer.* 2012 Dec 15;59(7):1332-3.
- 613 32) Tang F, Min L, Seebacher NA, Li X, Zhou Y, Hornicek FJ, Wei Y, Tu C, Duan Z. Targeting  
614 mutant TP53 as a potential therapeutic strategy for the treatment of osteosarcoma. *J Orthop*  
615 *Res.* 2019 Mar;37(3):789-798.

- 616 33) Tawbi HA, Burgess M, Bolejack V, Van Tine BA, Schuetze SM, Hu J, D'Angelo S, Attia S,  
617 Riedel RF, Priebat DA, Movva S, Davis LE, Okuno SH, Reed DR, Crowley J, Butterfield LH,  
618 Salazar R, Rodriguez-Canales J, Lazar AJ, Wistuba II, Baker LH, Maki RG, Reinke D, Patel  
619 S. Pembrolizumab in advanced soft-tissue sarcoma and bone sarcoma (SARC028): a  
620 multicentre, two-cohort, single-arm, open-label, phase 2 trial. *Lancet Oncol.* 2017  
621 Nov;18(11):1493-1501.
- 622 34) Paoluzzi L, Cacavio A, Ghesani M, Karambelkar A, Rapkiewicz A, Weber J, Rosen G.  
623 Response to anti-PD1 therapy with nivolumab in metastatic sarcomas. *Clin Sarcoma*  
624 *Res.* 2016 Dec 30;6:24.
- 625 35) Gomez-Brouchet A, Illac C, Gilhodes J, Bouvier C, Aubert S, Guinebretiere JM, Marie B,  
626 Larousserie F, Entz-Werlé N, de Pinieux G, Filleron T, Minard V, Minville V, Mascard E,  
627 Gouin F, Jimenez M, Ledelely MC, Piperno-Neumann S, Brugieres L, Rédini F.  
628 CD163-positive tumor-associated macrophages and CD8-positive cytotoxic lymphocytes are  
629 powerful diagnostic markers for the therapeutic stratification of osteosarcoma patients: An  
630 immunohistochemical analysis of the biopsies from the French OS2006 phase 3 trial.  
631 *Oncoimmunology.* 2017 Aug 24;6(9):e1331193.
- 632 36) Alves PM, de Arruda JAA, Arantes DAC, Costa SFS, Souza LL, Pontes HAR, Fonseca FP,  
633 Mesquita RA, Nonaka CFW, Mendonça EF, Batista AC. Evaluation of tumor-infiltrating  
634 lymphocytes in osteosarcomas of the jaws: a multicenter study. *Virchows Arch.* 2019  
635 Feb;474(2):201-207
- 636 37) Palmerini E, Agostinelli C, Picci P, Pileri S, Marafioti T, Lollini PL, Scotlandi K, Longhi  
637 A, Benassi MS, Ferrari S. Tumoral immune-infiltrate (IF), PD-L1 expression and role of  
638 CD8/TIA-1 lymphocytes in localized osteosarcoma patients treated within protocol ISG-OS1.  
639 *Oncotarget.* 2017 Dec 4;8(67):111836-111846.
- 640 38) Koirala P, Roth ME, Gill J, Piperdi S, Chinai JM, Geller DS, Hoang BH, Park A, Fremed  
641 MA, Zang X, Gorlick R. Immune infiltration and PD-L1 expression in the tumor  
642 microenvironment are prognostic in osteosarcoma. *Sci Rep.* 2016 Jul 26;6:30093.
- 643 39) Zheng W, Xiao H, Liu H, Zhou Y. Expression of programmed death 1 is correlated with  
644 progression of osteosarcoma. *APMIS.* 2015 Feb;123(2):102-7.
- 645 40) Wang D, Niu X, Wang Z, Song CL, Huang Z, Chen KN, Duan J, Bai H, Xu J, Zhao J, Wang  
646 Y, Zhuo M, Xie XS, Kang X, Tian Y, Cai L, Han JF, An T, Sun Y, Gao S, Zhao J, Ying J,  
647 Wang L, He J, Wang J. Multiregion Sequencing Reveals the Genetic Heterogeneity and  
648 Evolutionary History of Osteosarcoma and Matched Pulmonary Metastases. *Cancer Res.*  
649 2019 Jan 1;79(1):7-20.
- 650 41) Stamm H, Oliveira-Ferrer L, Grossjohann EM, Muschhammer J, Thaden V, Brauneck F,  
651 Kischel R, Müller V, Bokemeyer C, Fiedler W, Wellbrock J. Targeting the TIGIT-PVR  
652 immune checkpoint axis as novel therapeutic option in breast cancer. *Oncoimmunology.* 2019  
653 Oct 12;8(12):e1674605.

- 654 42) Hoogi S, Eisenberg V, Mayer S, Shamul A, Barliya T, Cohen CJ. A TIGIT-based chimeric  
655 co-stimulatory switch receptor improves T-cell anti-tumor function. *J Immunother Cancer*.  
656 2019 Sep 9;7(1):243.
- 657 43) Washburn ML, Wang Z, Walton AH, Goedegebuure SP, Figueroa DJ, Van Horn S, Grossman  
658 J, Remlinger K, Madsen H, Brown J, Srinivasan R, Wolf AI, Berger SB, Yi VN, Hawkins  
659 WG, Fields RC, Hotchkiss RS. T Cell- and Monocyte-Specific RNA-Sequencing Analysis in  
660 Septic and Nonseptic Critically Ill Patients and in Patients with Cancer. *J Immunol*. 2019 Oct  
661 1;203(7):1897-1908.
- 662 44) Zhang Q, Bi J, Zheng X, Chen Y, Wang H, Wu W, Wang Z, Wu Q, Peng H, Wei H, Sun R,  
663 Tian Z. Blockade of the checkpoint receptor TIGIT prevents NK cell exhaustion and elicits  
664 potent anti-tumor immunity. *Nat Immunol*. 2018 Jul;19(7):723-732.
- 665 45) Dumars C, Ngyuen JM, Gaultier A, Lanel R, Corradini N, Gouin F, Heymann D, Heymann  
666 MF. Dysregulation of macrophage polarization is associated with the metastatic process in  
667 osteosarcoma. *Oncotarget*. 2016 Nov 29;7(48):78343-78354.
- 668 46) Brard C, Piperno-Neumann S, Delaye J, Brugières L, Hampson LV, Le Teuff G, Le Deley  
669 MC, Gaspar N. Sarcome-13/OS2016 trial protocol: a multicentre, randomised, open-label,  
670 phase II trial of mifamurtide combined with postoperative chemotherapy for patients with  
671 newly diagnosed high-risk osteosarcoma. *BMJ Open*. 2019 May 19;9(5):e02587.
- 672 47) Su S, Chen J, Yao H, Liu J, Yu S, Lao L, Wang M, Luo M, Xing Y, Chen F, Huang D, Zhao J,  
673 Yang L, Liao D, Su F, Li M, Liu Q, Song E. CD10+GPR77+ Cancer-Associated Fibroblasts  
674 Promote Cancer Formation and Chemoresistance by Sustaining Cancer Stemness..*Cell*. 2018  
675 Feb 8;172(4):841-856.e16.
- 676 48) Fearon DT. The carcinoma-associated fibroblast expressing fibroblast activation protein and  
677 escape from immune surveillance. *Cancer Immunol Res*. 2014 Mar;2(3):187-93.
- 678 49) Elyada E, Bolisetty M, Laise P, Flynn WF, Courtois ET, Burkhart RA, Teinor JA, Belleau  
679 P, Biffi G, Lucito MS, Sivajothi S, Armstrong TD, Engle DD, Yu KH, Hao Y, Wolfgang  
680 CL, Park Y, Preall J, Jaffee EM, Califano A, Robson P, Tuveson DA. Cross-Species  
681 Single-Cell Analysis of Pancreatic Ductal Adenocarcinoma Reveals Antigen-Presenting  
682 Cancer-Associated Fibroblasts. *Cancer Discov*. 2019 Aug;9(8):1102-1123.
- 683 50) An Y, Liu F, Chen Y, Yang Q. Crosstalk between cancer-associated fibroblasts and immune  
684 cells in cancer. *J Cell Mol Med*. 2019 Oct 23. doi: 10.1111/jcmm.14745.

685

686

687

688

689

690

691

692

693

694

695

696

697

698

699

700

701

702

703

### Tables and Figure Legends

704

705 **Table 1.** Clinical Characteristics of OS Patients

706 **Fig. 1 Delineation of diverse cell types in OS using the scRNA-seq method.**

707 (A) The t-SNE plot displayed the main cell types in OS tissue. (B) Violin plots  
708 demonstrated the expression levels of cluster-specific marker genes. (C) Dot plot  
709 displayed multiple well-known cell type-specific biomarkers across clusters. The size  
710 of dots represents the proportion of cells expressing a particular marker, and the  
711 spectrum of color indicates the mean level of this gene. Legends are shown as above.  
712 (D) Heatmap showed the significant gene in each cell group.

713

714 **Fig. 2. Differential gene expression profiles in malignant OS cells.**

715 (A) The malignant osteoblast cells, here named OS, were divided into 5 subtypes  
716 based on t-SNE analysis. (B) The characteristics of 5 subgroups. OS cells were  
717 differentiated by GO analysis. (C) The trajectory analysis of the OS cells included  
718 primary, metastasis and recurrence. (D) The primary OS cells gathered 4 clusters. For  
719 primary and metastatic OS cells, the differentially expressed genes (rows) in  
720 conformity with the pseudo-time (columns) gathered hierarchically into 6 cluster  
721 profiles. For primary and recurrent OS gene profiles, 6 clusters were gathered.  
722 Furthermore, we outlined the corresponding diagram on the basis of the transcription  
723 factor data. Color key from blue to red indicates relative expression levels from low to

724 high.

725

726 **Fig. 3. Distinct subpopulations of osteoclastic cells based on scRNA-seq data.**

727 (A) Graphical (t-SNE) plot demonstrated 3 main cell subtypes of OC. (B) We also  
728 showed the t-SNE plot figure marked ACP5, CTSK, CD74 and TOP2A separately. (C)  
729 Pseudo-time figure showed the development of OC subpopulations. We also  
730 presented the Pseudo-time marked ACP5, CTSK, CD74 and TOP2A respectively. (D)  
731 Different cell subtype clusters are color coded. The OC subtypes were classified  
732 according to the expression levels of specific genes represented in the heatmap. The  
733 GO analysis displayed the significant differences among 3 clusters. (E) The row graph  
734 was gathered hierarchically into 5 clusters. (F) We detected the expression of CD74  
735 and CTSK in OS samples by IHC.

736

737 **Fig. 4. Identification of CAF subtypes in OS tissue.**

738 (A) Unsupervised clustering of two CAF cells from OS samples represented in a  
739 t-SNE plot graph. Different cell type clusters were color coded. (B) Violin plots of  
740 selected apCAF and mCAF markers, showing normalized expression in two of the  
741 subclusters. (C) Many specific genes were uniquely upregulated in the apCAF  
742 subtype, including HLA-DRA, CD74, APOE *etc.*

743

744 **Fig. 5. Single-cell analysis of myeloid cells in OS samples.**

745 (A) t-SNE plot of the myeloid cell subgroup in OS tumor samples. (B) M2-polarized  
746 markers CD163 and MRC1/CD206 were expressed in almost all TAMs. (C) The  
747 relative expression levels of the well-known biomarkers of each cell type as indicated  
748 in the violin plots. (D) Bubble plot was used to identify each cell type-specific  
749 markers across clusters. Size of dots represents fraction of cells expressing a  
750 particular marker, and intensity of color indicates level of mean expression.

751

752 **Fig. 6. Subgroups of TILs in the OS tumor.**

753 (A) Reclustering of the subgroup of TILs in the OS data represented in the t-SNE plot.  
754 Proportion of each subgroup cells in primary, recurrent and pulmonary metastatic  
755 tumor samples was provided. The tab exhibited the concrete value of each scRNA-seq  
756 sample gained. (B) Microscopy of the expression of CD3, CD4 and CD8 in primary,

757 recurrent and pulmonary metastatic OS tissues. Black scale bar is 100  $\mu\text{m}$ . (C) The  
758 violin plots expound normalized levels of markers in the different subclusters. (D)  
759 The well-known markers of each cell population were represented in dot plot.

760

761

762 **Fig. 7. Blockade of the TIGIT increases the specific lysis of breast cancer cell**  
763 **lines.**

764 (A) Immunostaining of TIGIT in 11 OS tissue displayed dark brown. Scale bar: 100  
765  $\mu\text{m}$ . (B) We analyzed the lysis of the cytokine-induced killer cells (CIKs) produced  
766 from OS patients(  $n = 2$ ) with or without blocking TIGIT on the OS cell line U2OS  
767 and 143B. Results of cytotoxicity ratio are depicted as the mean  $\pm$  SD. For statistical  
768 analysis paired T-tests were performed (\* means  $p < 0.05$ )

769

770 **Fig. S1. The t-SNE analysis of individual**

771 (A) The t-SNE results of 11 samples were shown on the list. The cell number and  
772 percentage of assigned cell types were summarized in the right panel. Cell number of  
773 all clusters were summarized in the right tab. (B) The t-SNE were gathered by region.

774

775 **Fig. S2. The analysis of key genes in OS cells**

776 (A) The KEGG analysis of OS cells was shown on the list. (B) The remarkable genes  
777 of each subtype were enriched in heatmap.

778

779 **Fig. S3. The CNV analysis of OS cells**

780 (A) The CNV analysis of primary OS cells revealed amplification of the chromosome  
781 21 and 7 in almost all samples. (B) The CNV analysis of lung metastatic OS cells  
782 showed rare del in all chromosomes. (C) The CNV analysis of recurrent OS cells also  
783 exhibited amplification of the chromosome 21,7.

784 **Fig. S4. The t-SNE analysis of TILs from OS different location**

785 (A) The t-SNE results of TILs from primary OS tissue. (B) The t-SNE results of TILs  
786 from lung metastasis OS tissue. (C) The t-SNE results of TILs from recurrent OS  
787 tissue.

788 **Fig. S5. The co-expression of CD74 and CTSK in OCs at different OS tissue**

789 (A) The OC cells with CD74 and CTSK expression in primary OS tissue. (B) The OC

790 cells with CD74 and CTSK expression in recurrent OS tissue. (C) The OC cells with  
791 CD74 and CTSK expression in lung metastasis OS tissue.(The CD74 positive cell  
792 presented red color, the CTSK positive cell presented green color, the nuclear was  
793 stain blue color)

794



795 **Table 1. Clinical Characteristics of OS Patients**

| Sample | Gender | Age | pathological type         | Type              | location | Preoperative chemotherapy          | Size(cm) | Necrosis rate | Ki67 |
|--------|--------|-----|---------------------------|-------------------|----------|------------------------------------|----------|---------------|------|
| BC2    | male   | 11  | conventional              | Insitu            | Femur    | 4 times(MTX,AP,IFO,MTX)            | 5.5*5*3  | <90%          | 50%  |
| BC3    | Female | 11  | conventional              | Insitu            | Tibia    | 6 times(MTX,AP,MTX,AP, MTX,MTX )   | 8*6*6    | <90%          | 70%  |
| BC5    | Female | 19  | conventional              | Insitu            | Fibula   | 3 times(MTX,IFO,AP )               | 8*7.5*6  | ≥90%          | 80%  |
| BC6    | Female | 23  | conventional              | Insitu            | Ulna     | 3 times(MTX,IFO,AP )               | 7*7*4    | ≥90%          | 15%  |
| BC10   | Female | 19  | conventional              | Metastasis (Lung) | Femur    | 2 times(GT )                       | 3.5*3*2  | <90%          | 8%   |
| BC11   | male   | 12  | conventional              | Recurrent         | Femur    | 3 times(GT )                       | 20*11*10 | <90%          | 30%  |
| BC16   | male   | 11  | conventional              | Insitu            | Tibia    | 4 times(IFO,ADM+Lobapltin,MTX,MTX) | 6*4*2.5  | <90%          | 40%  |
| BC17   | Female | 32  | chondroblast              | Metastasis (Lung) | Tibia    | 3 times(GT )                       | 2*2*1.5  | <90%          | 40%  |
| BC20   | male   | 9   | Chondroblast              | Recurrent         | Femur    | 4 times(ADM+VP-16+ ADM+VP-16 )     | 10*8*5   | <90%          | 50%  |
| BC21   | Female | 38  | intraosseous osteosarcoma | Insitu            | Femur    | 4 times(MTX,AP,IFO,AP)             | 5*4*1    | <90%          | 10%  |
| BC22   | male   | 15  | chondroblast              | Insitu            | Femur    | 4 times (MTX,AP,IFO,MTX)           | 18*15*12 | <90%          | 20%  |

796

797

Figure 1

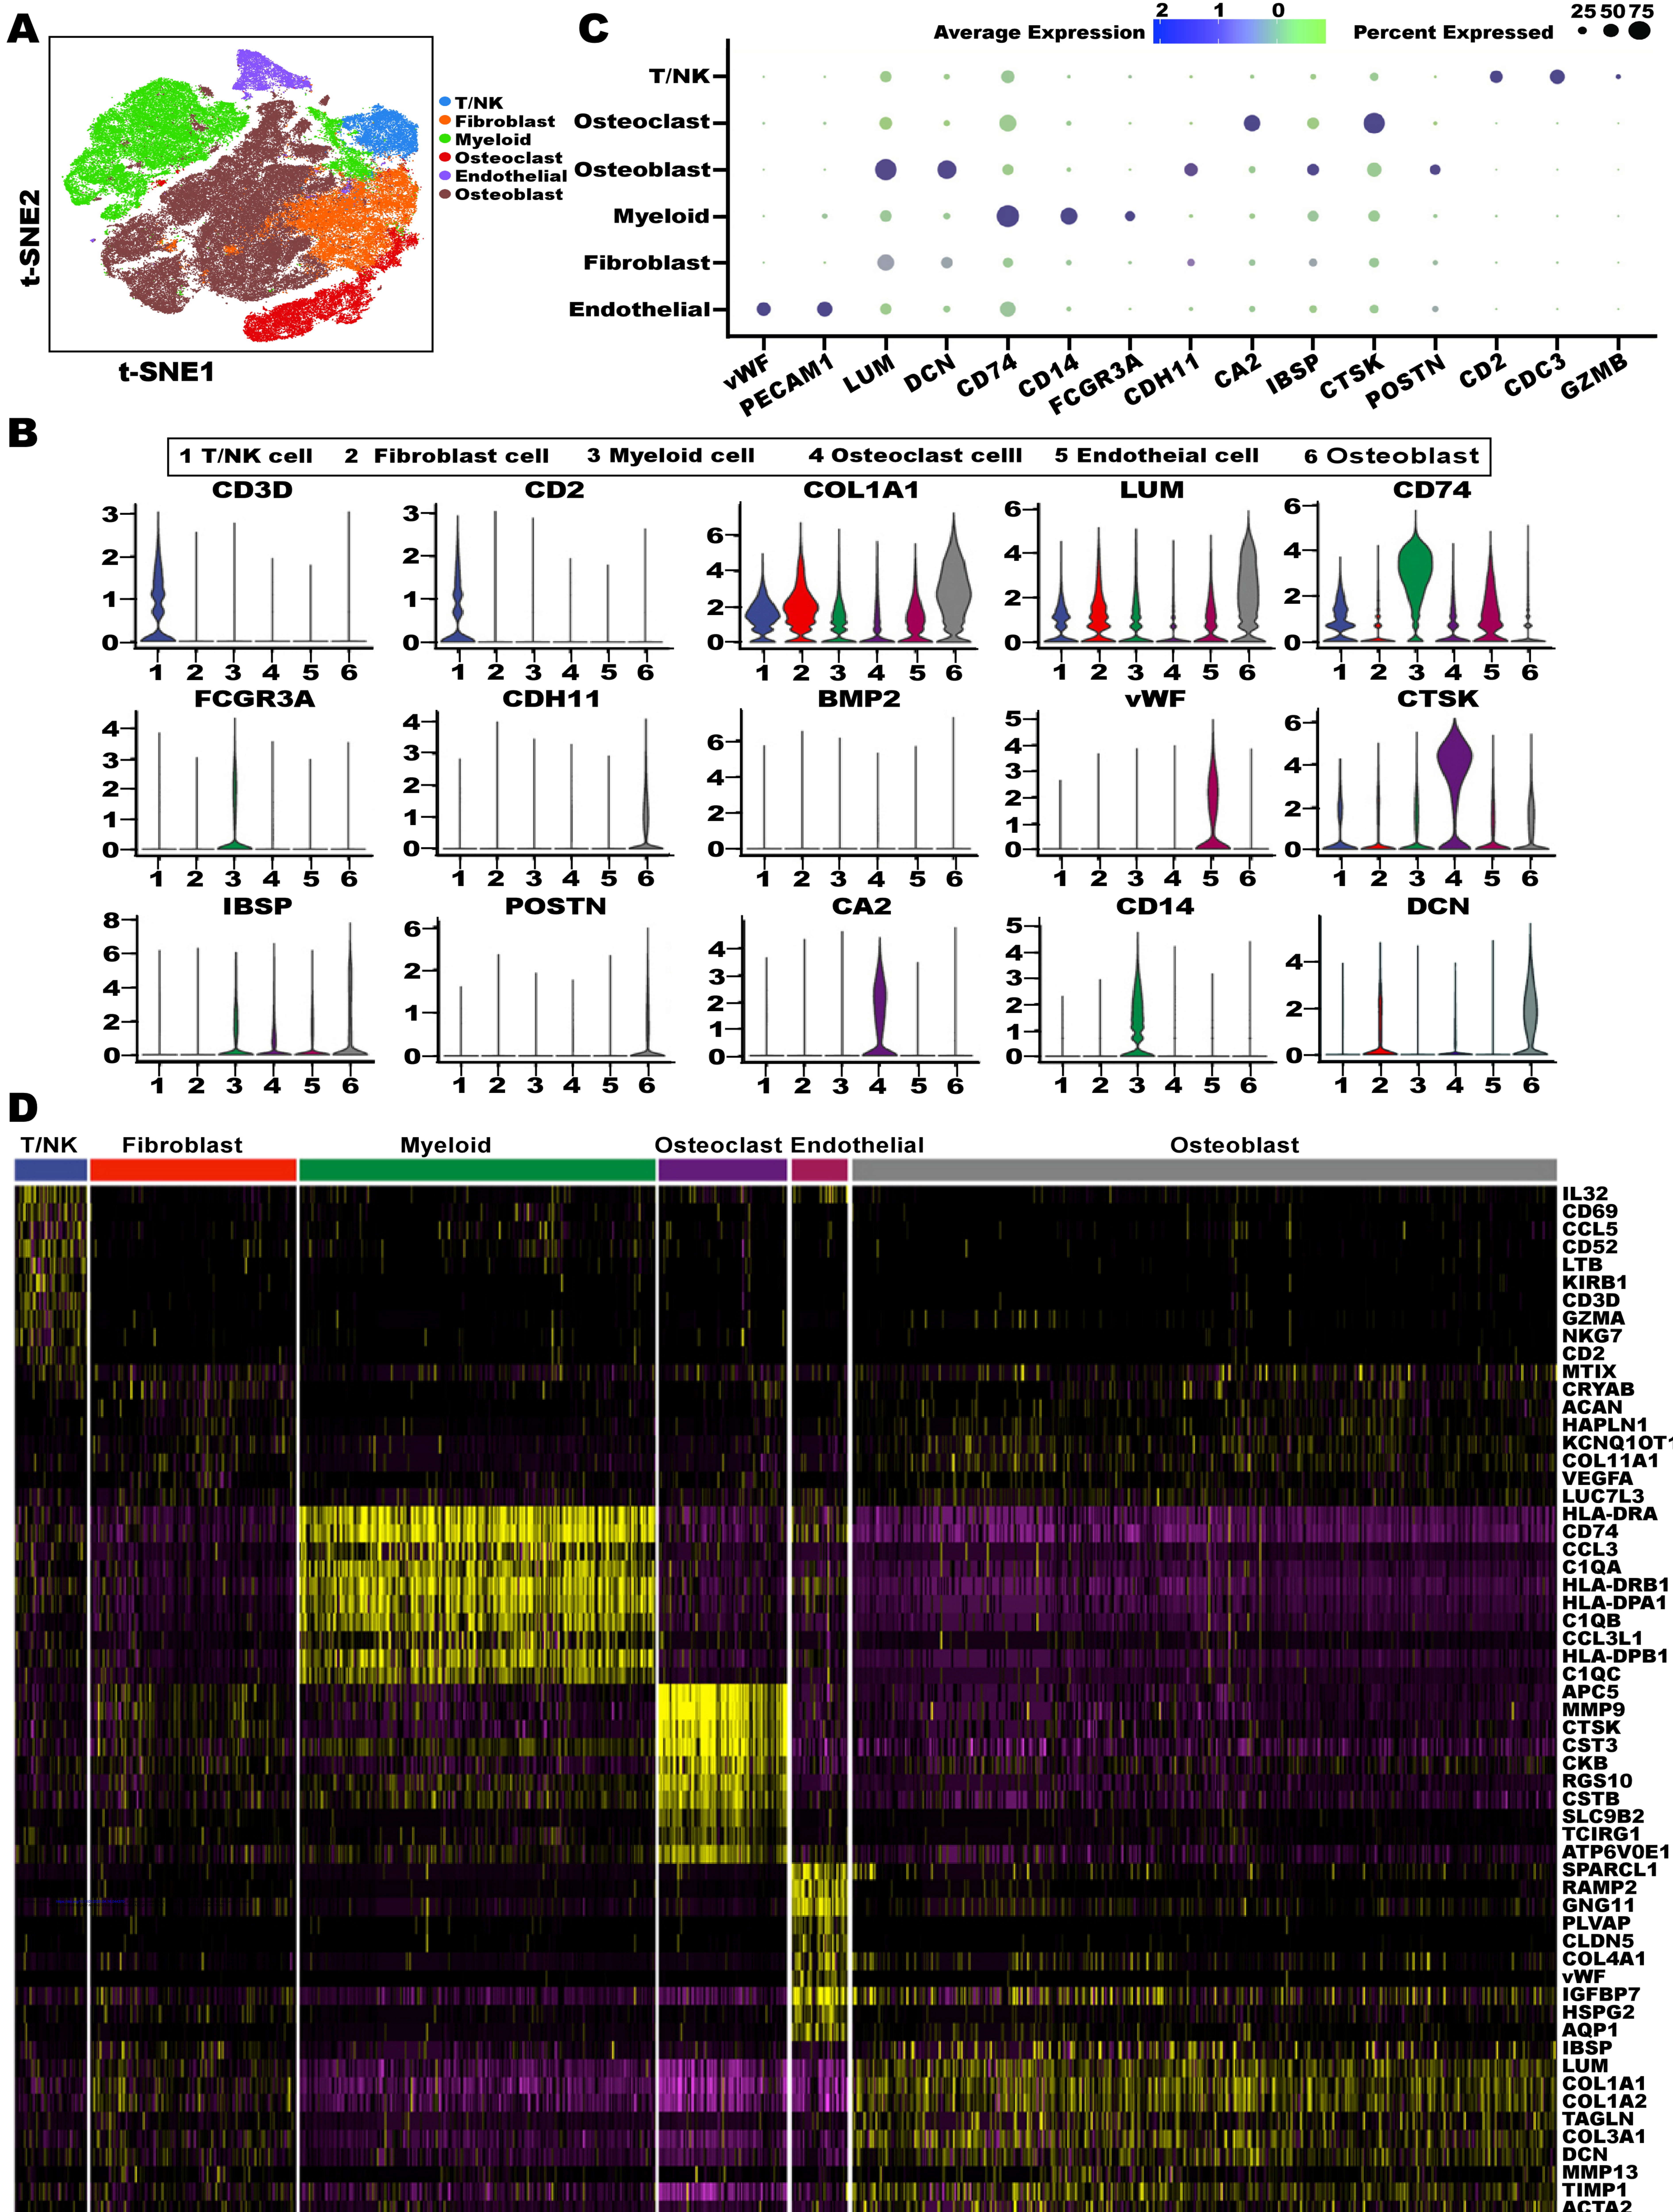

# Figure 2

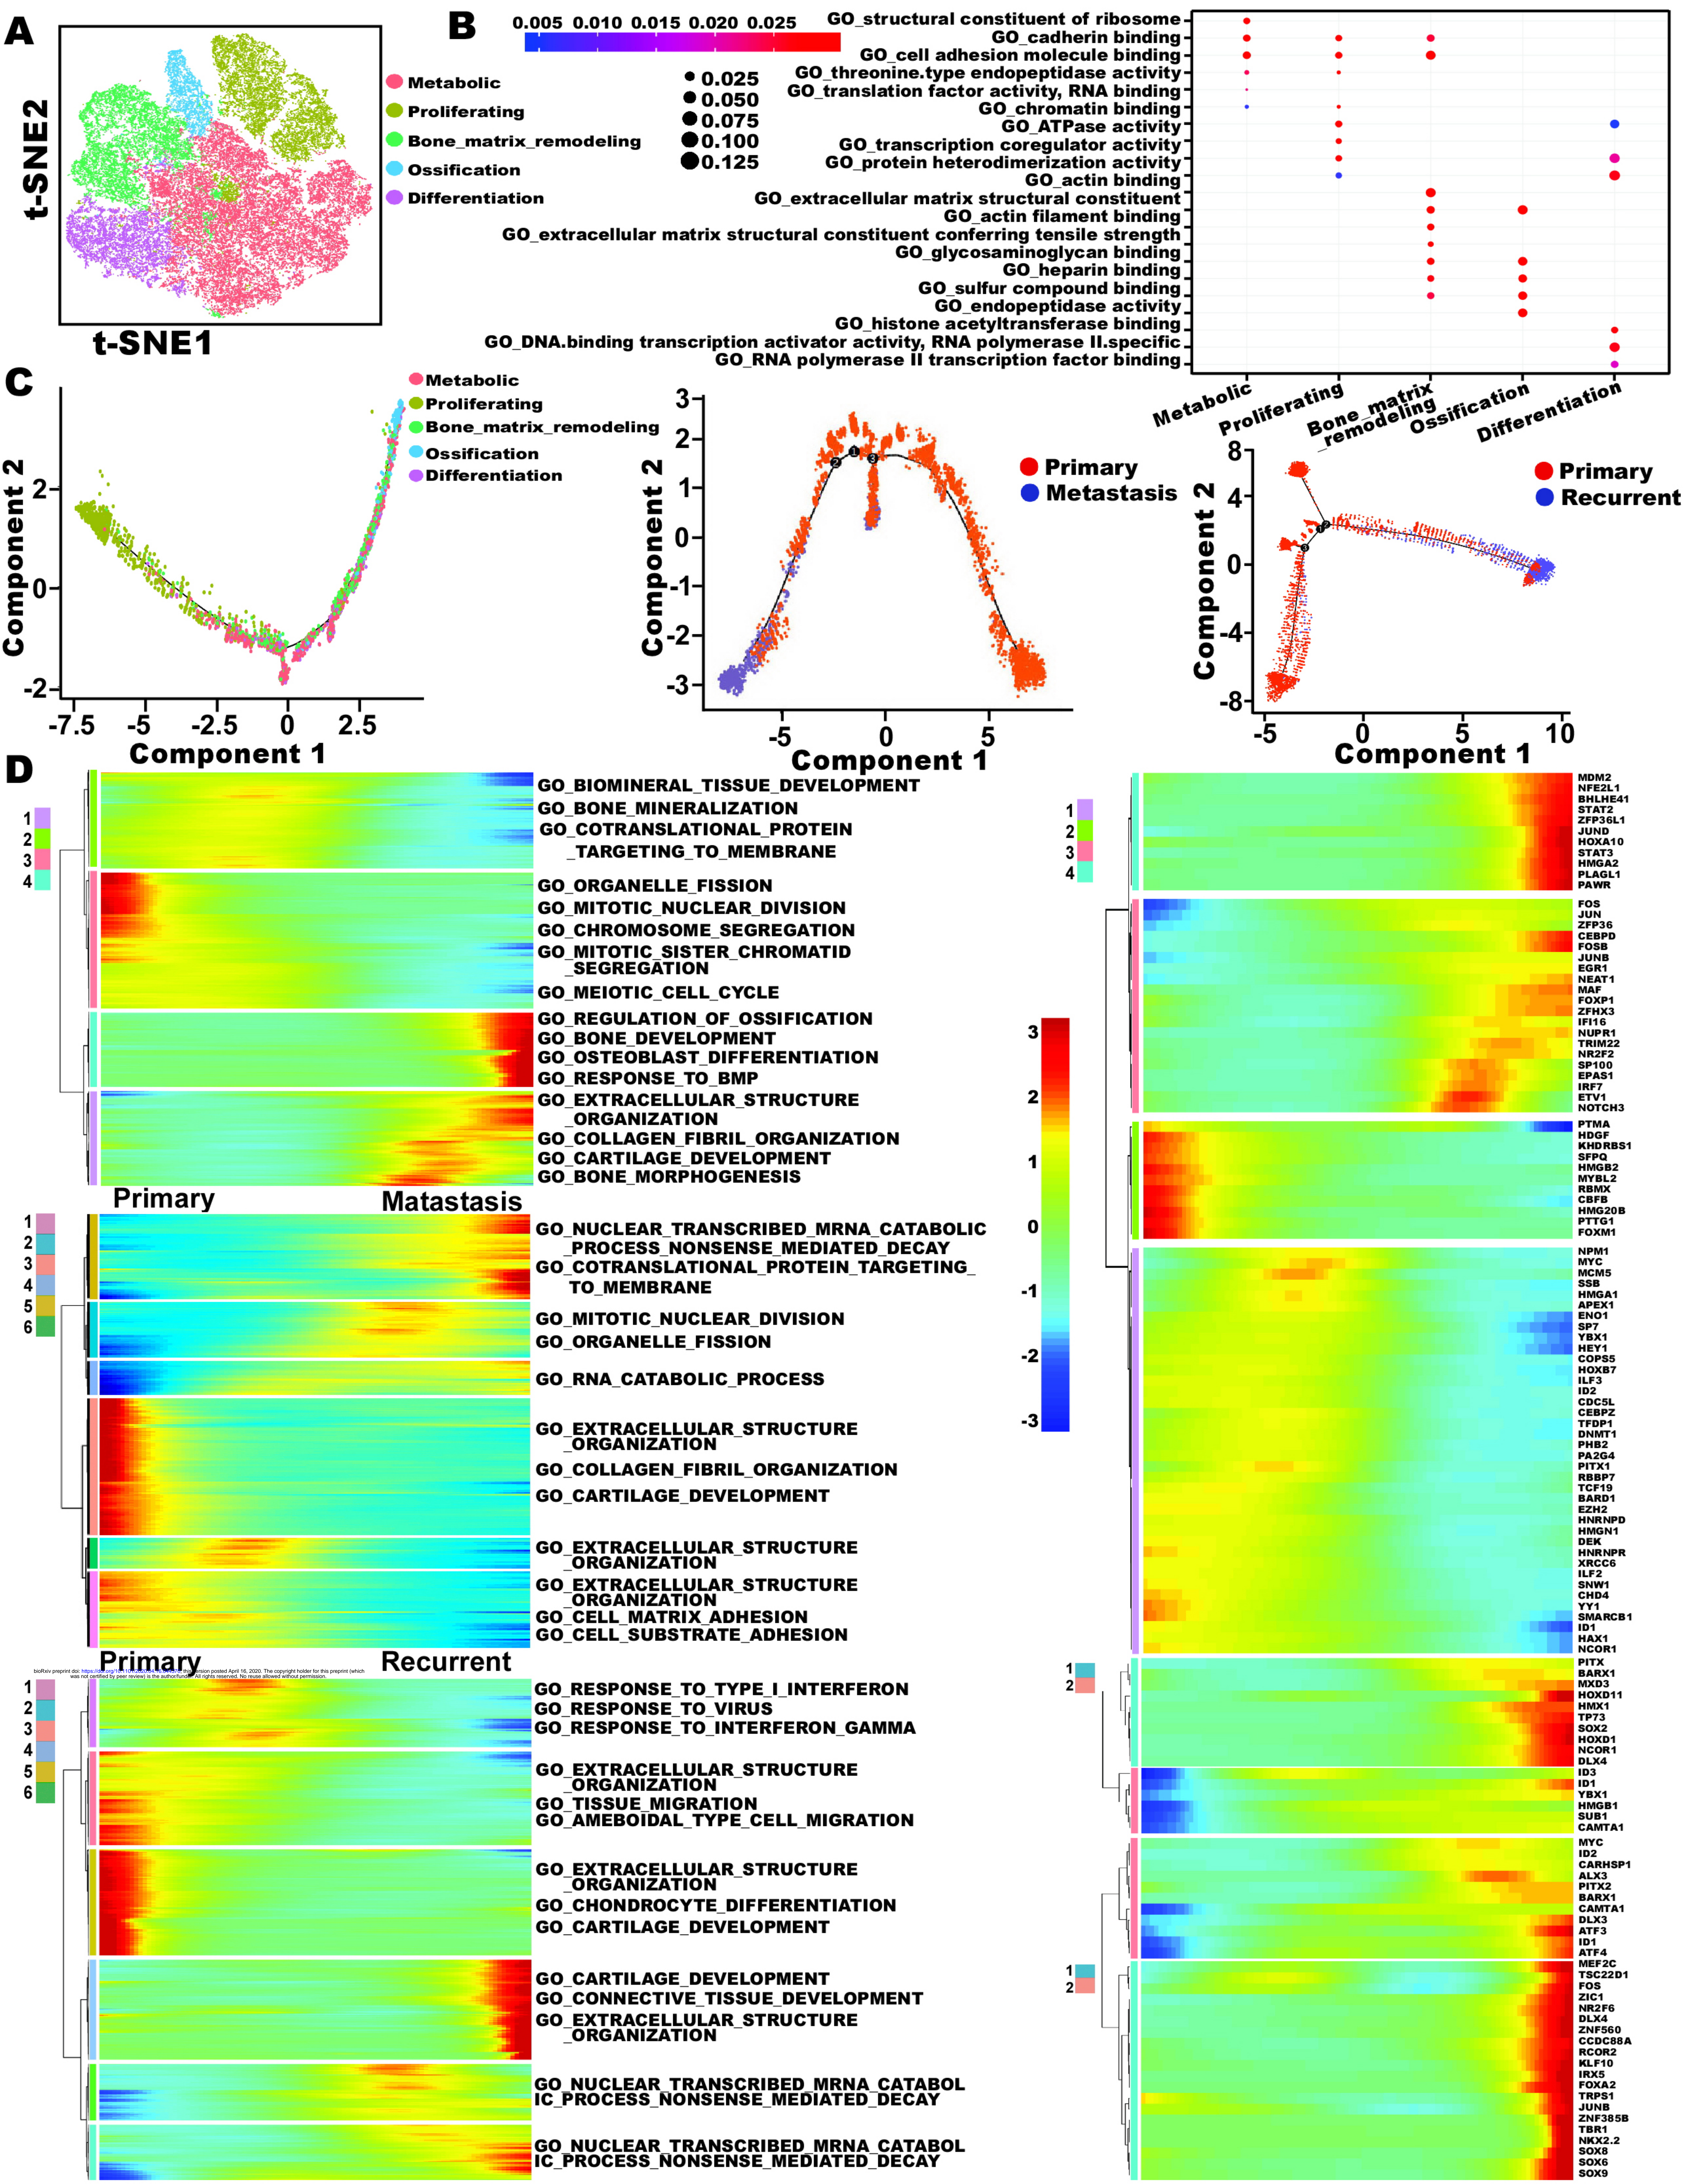

**Figure 3**

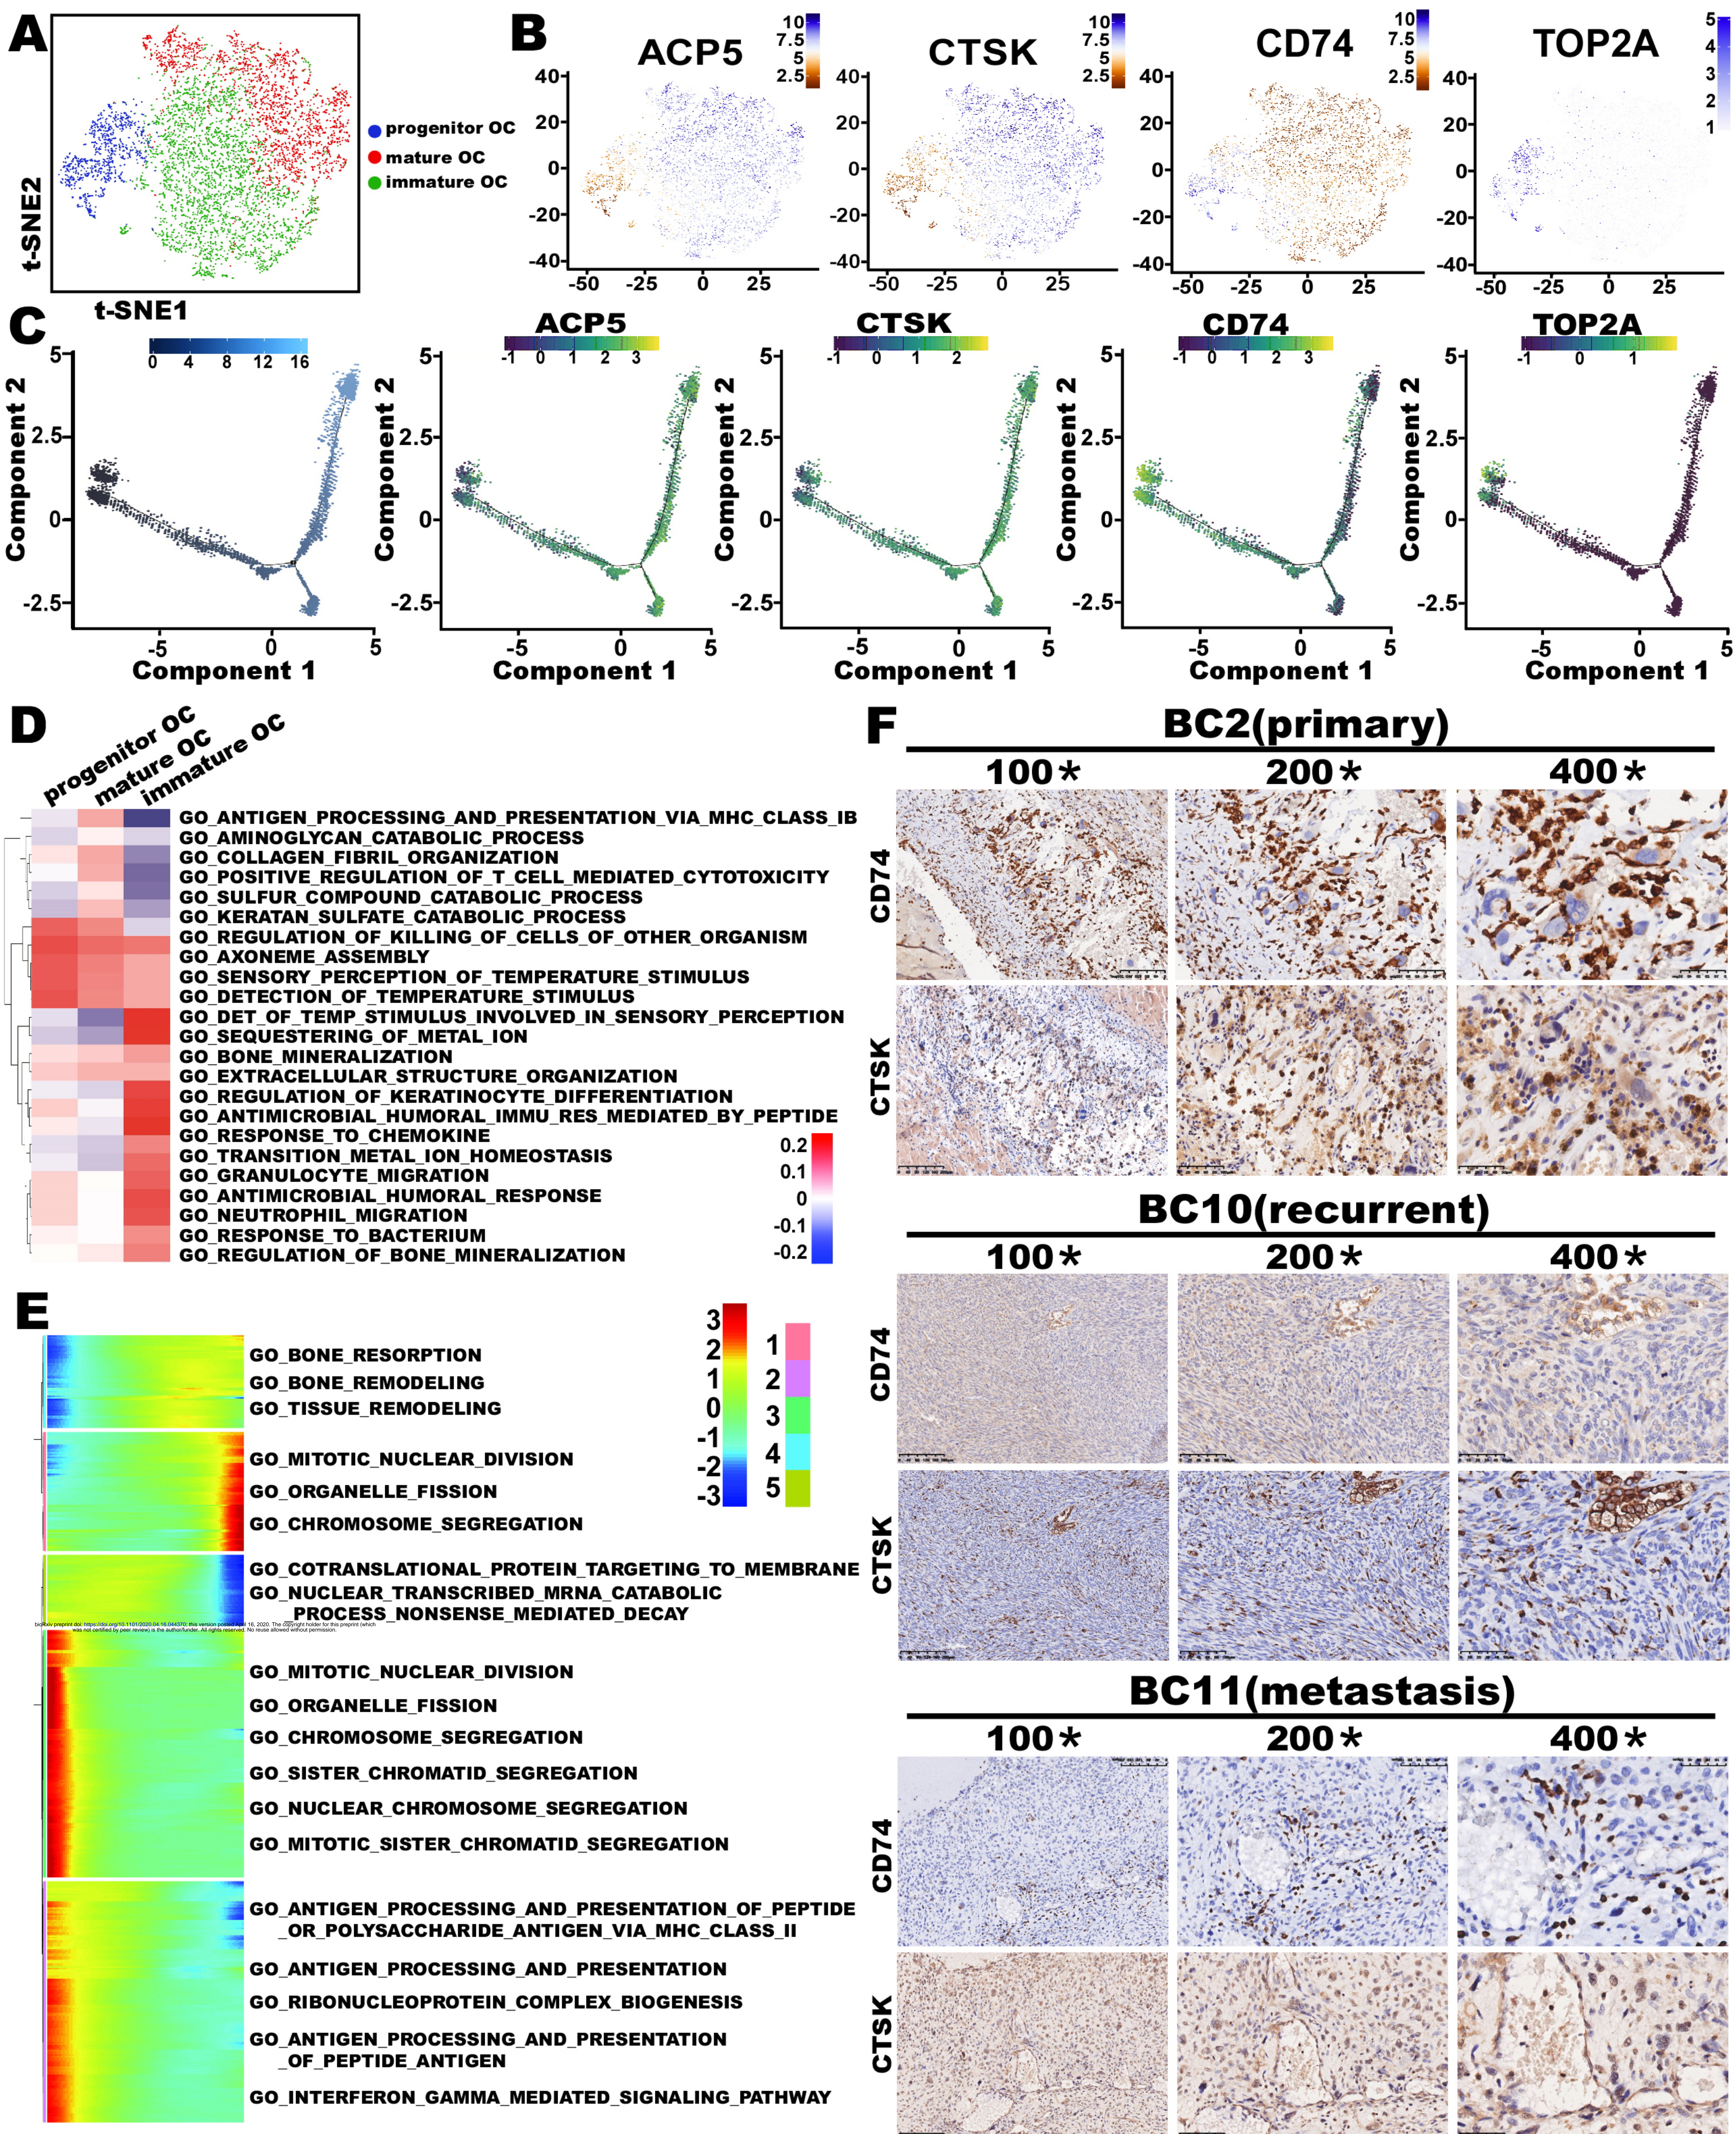

Figure 4

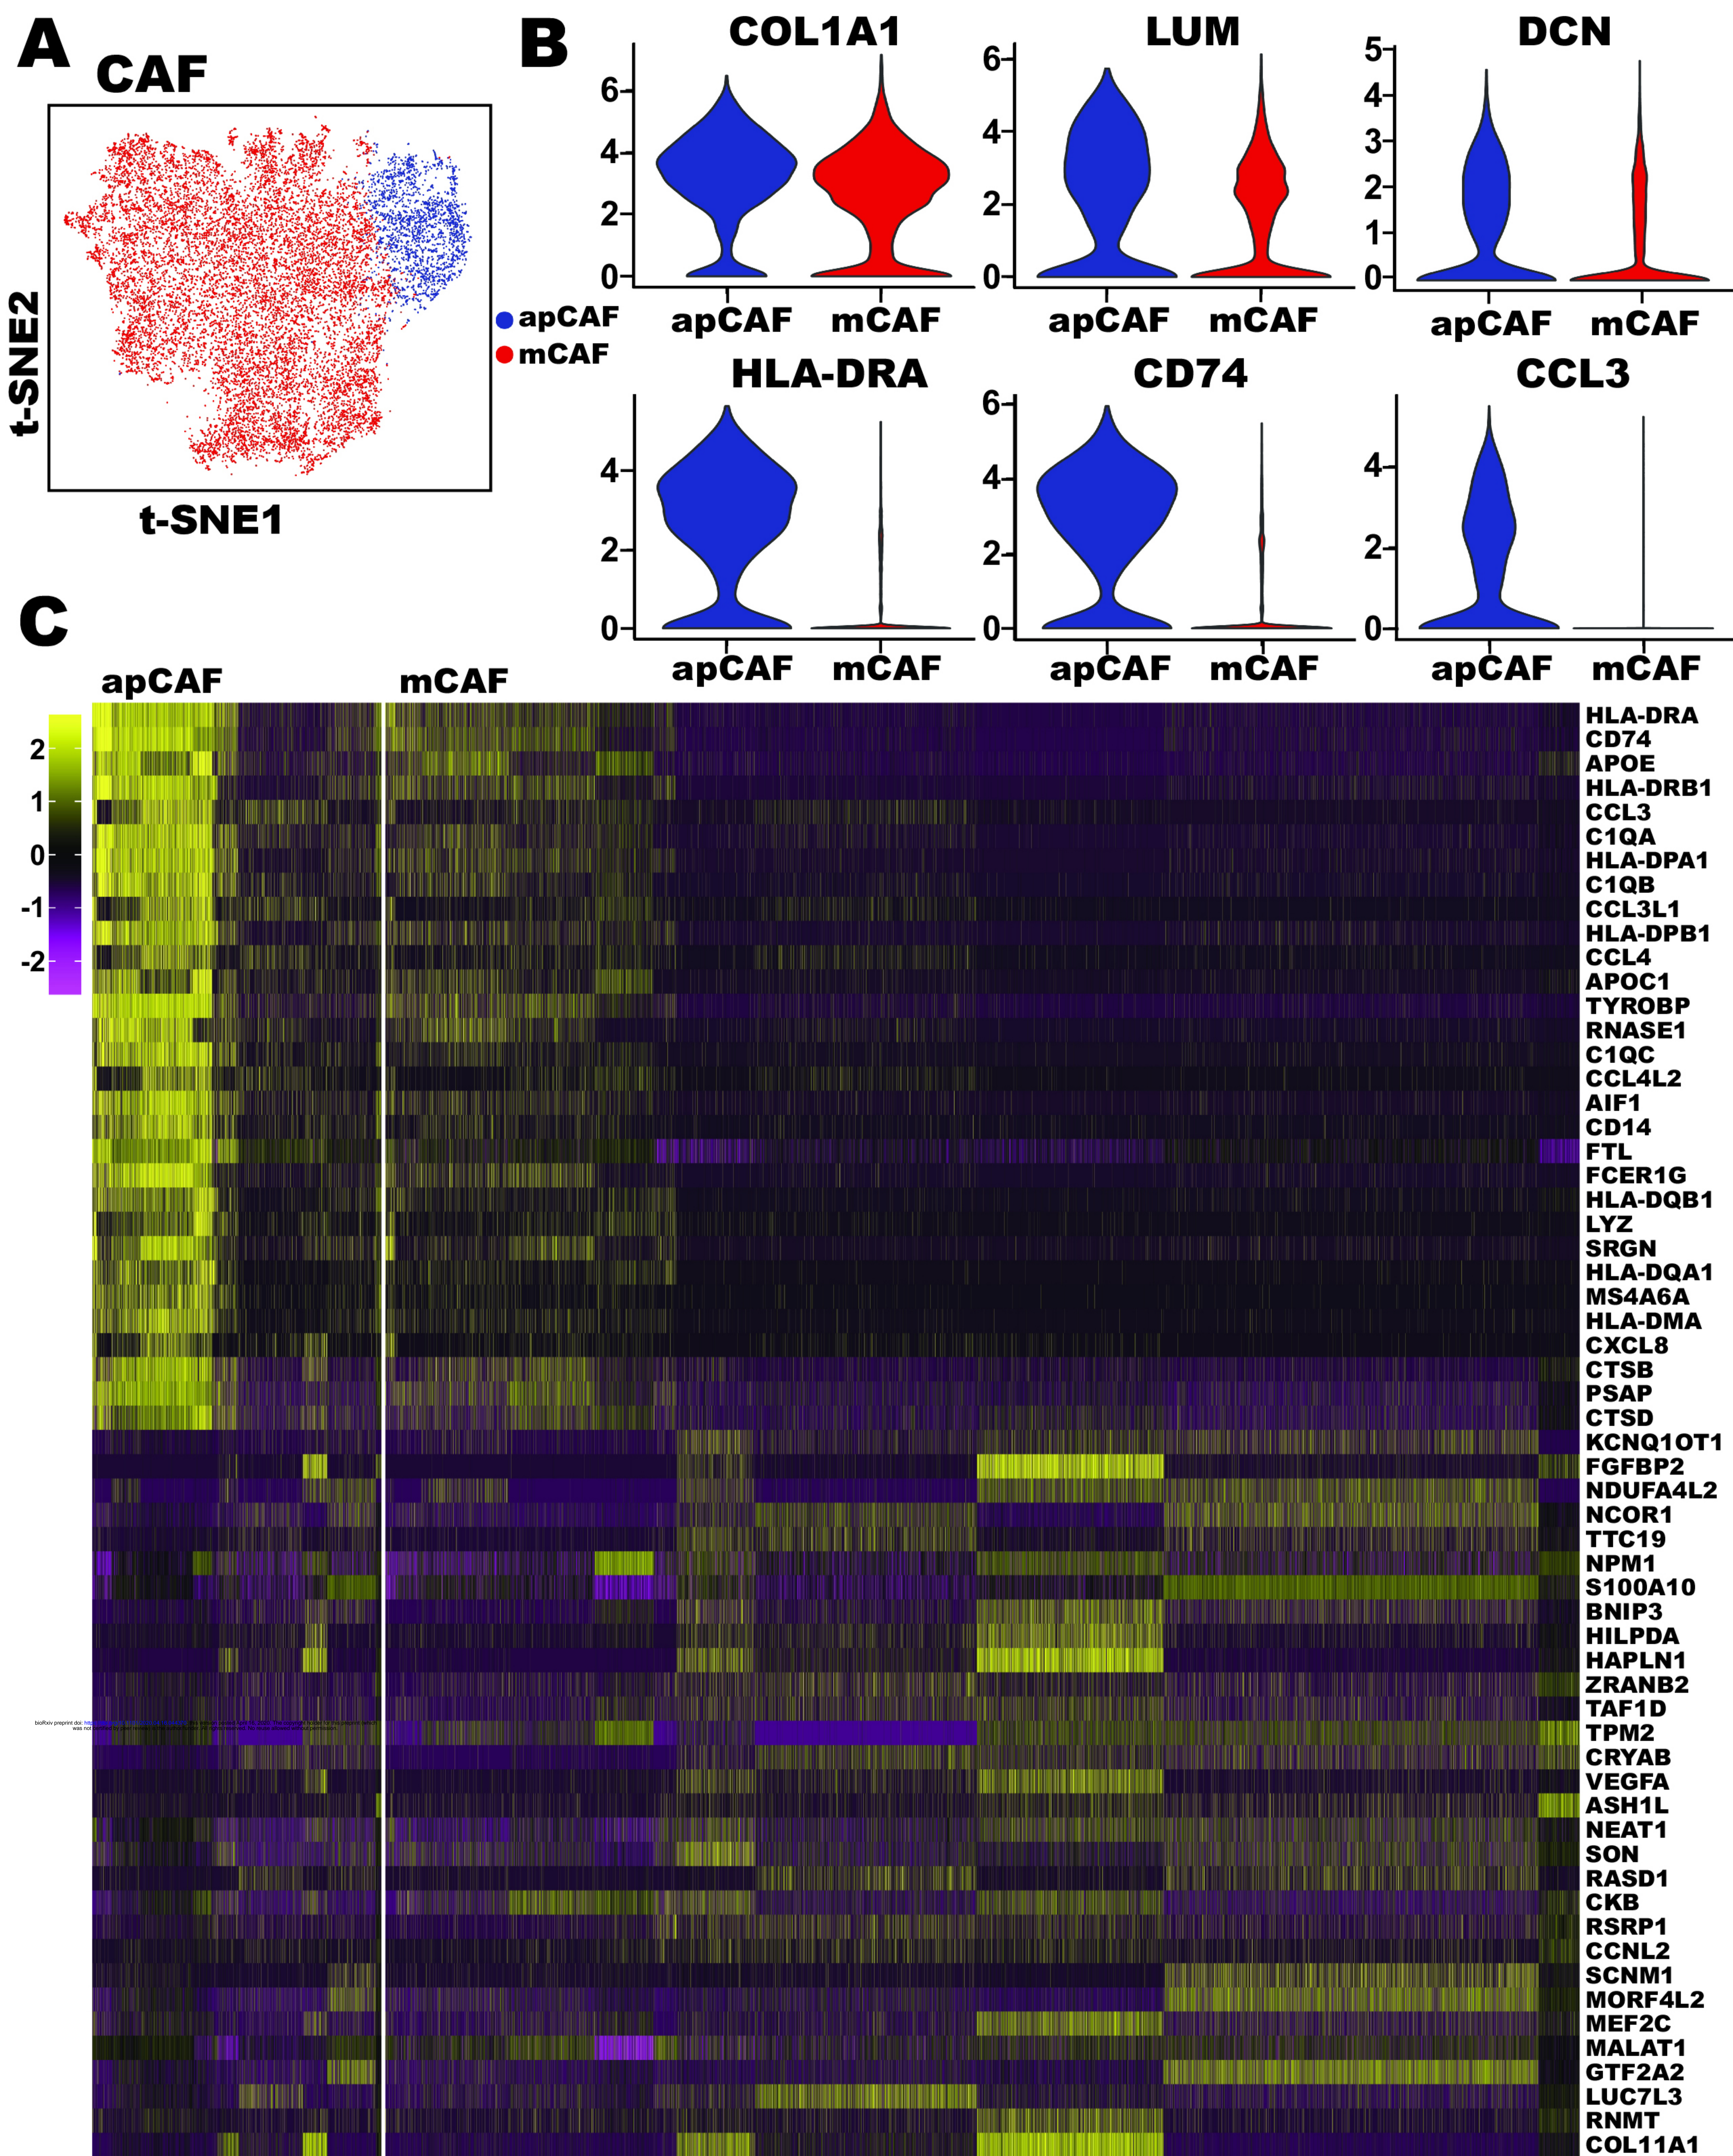

**Figure 5**

**A**

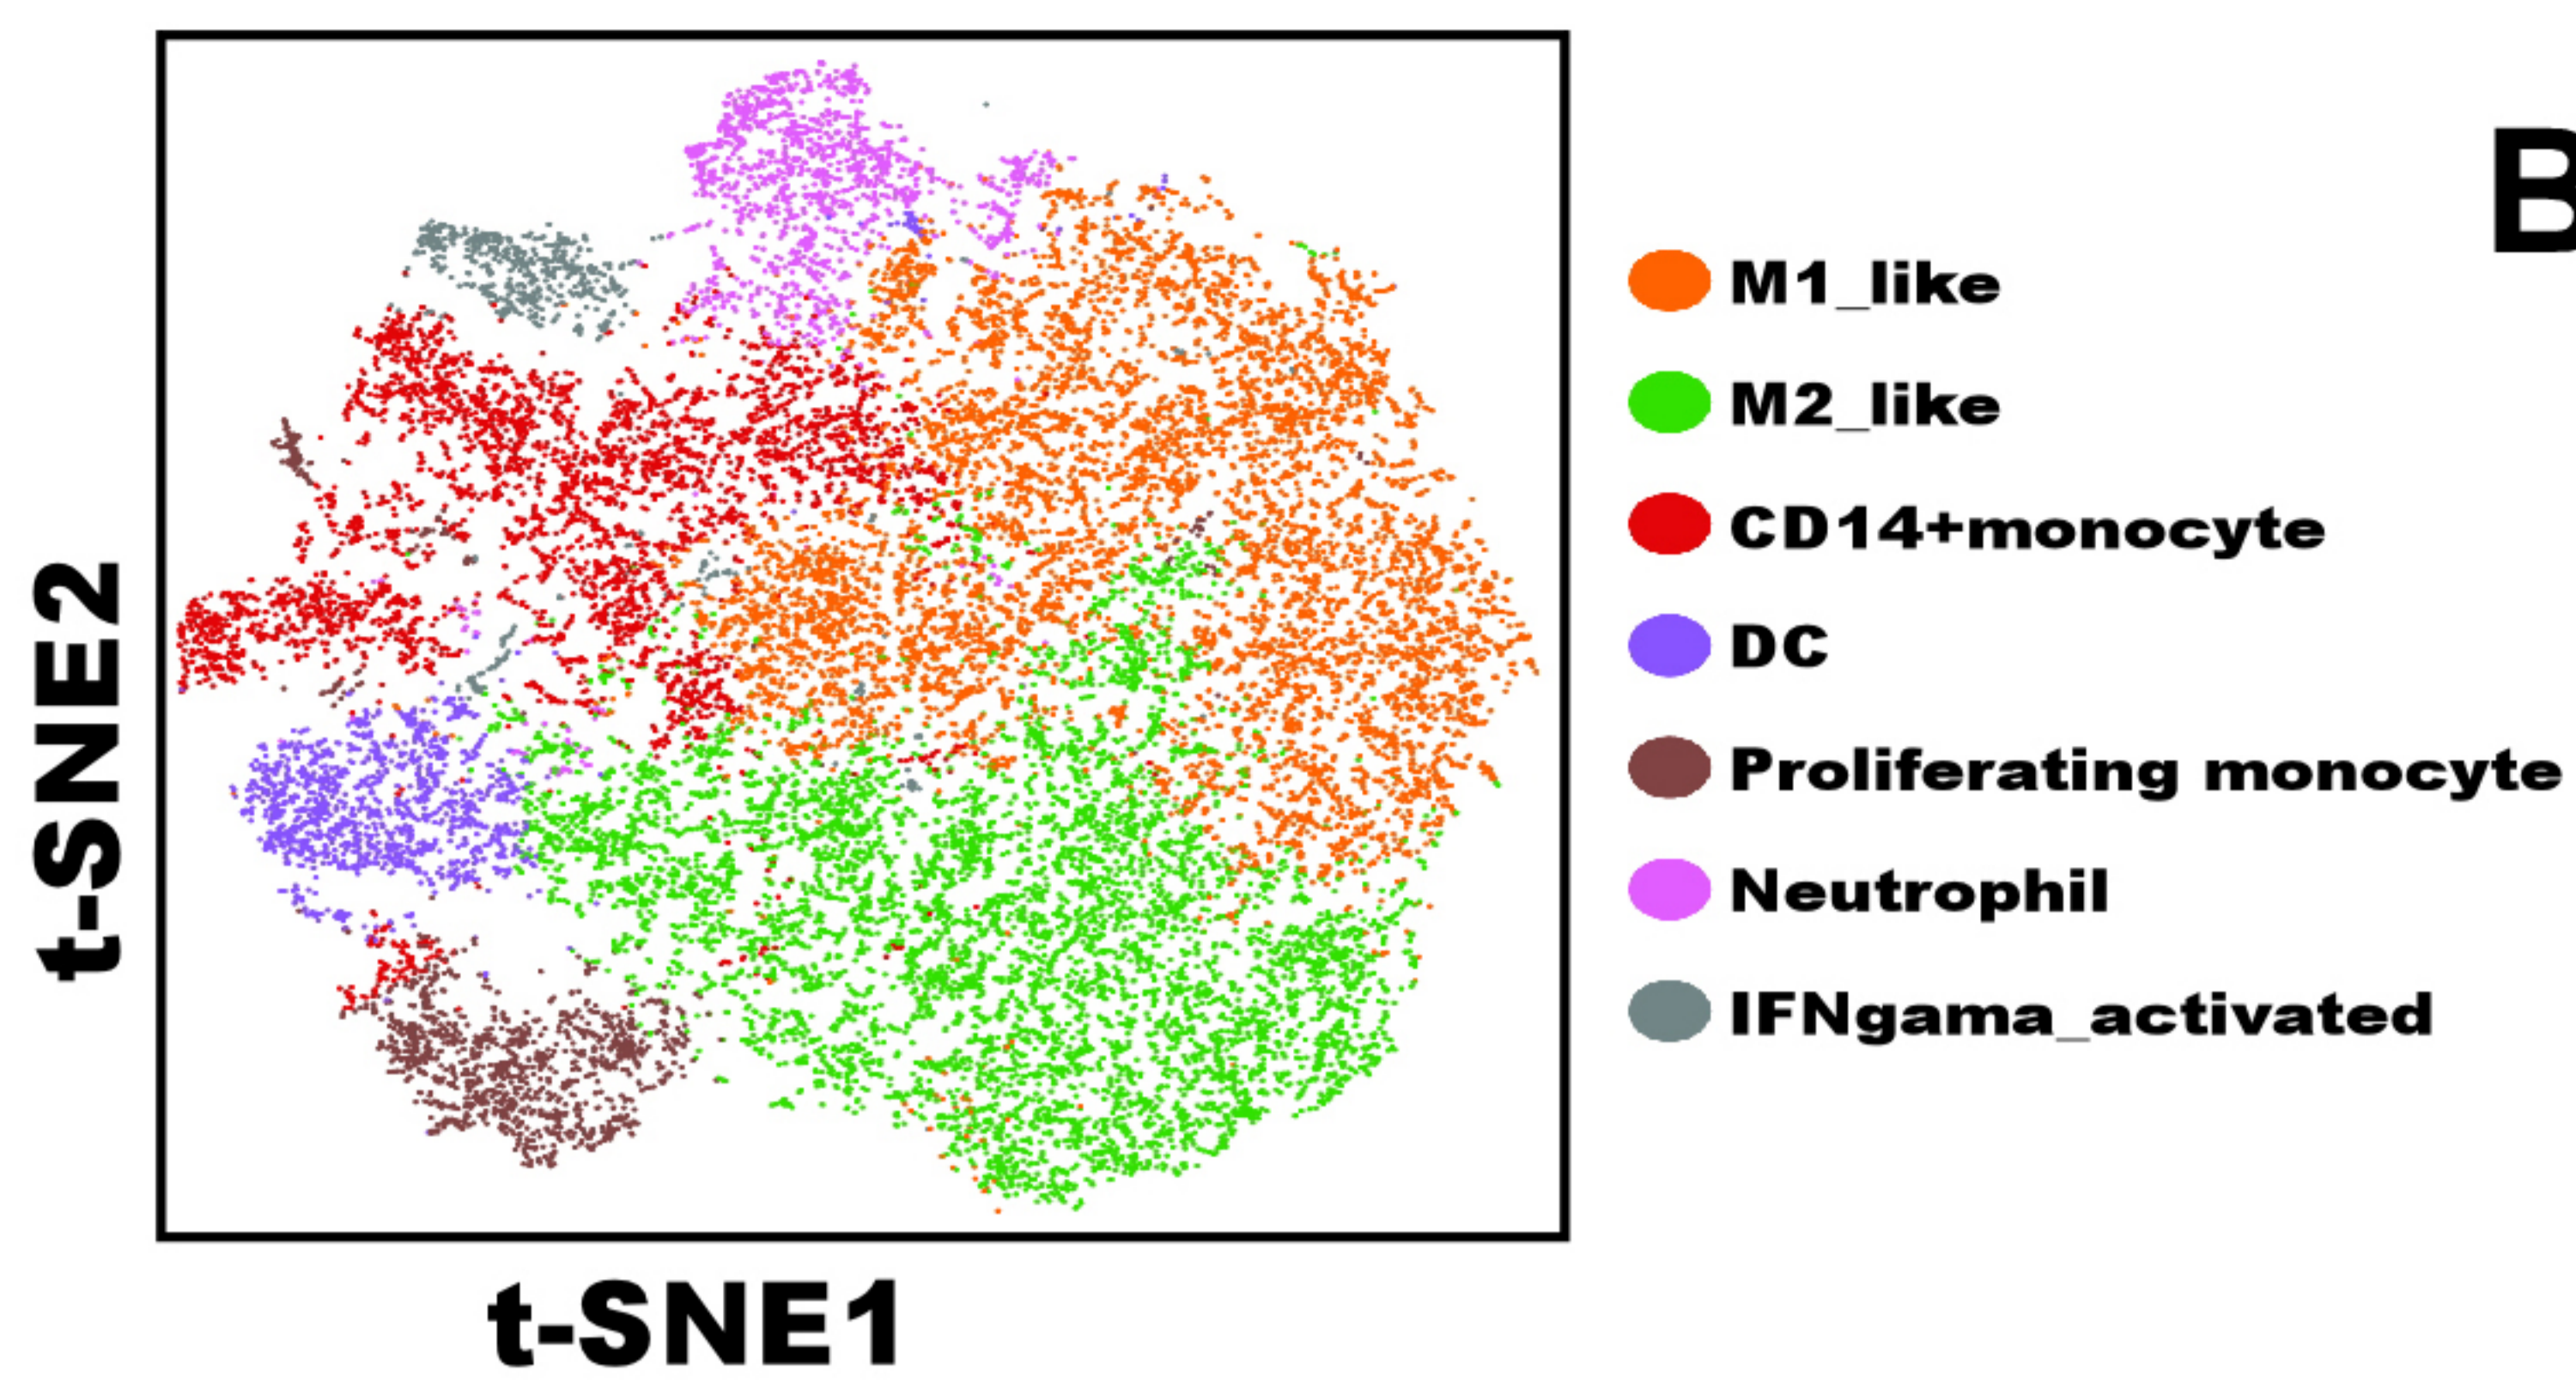

**B**

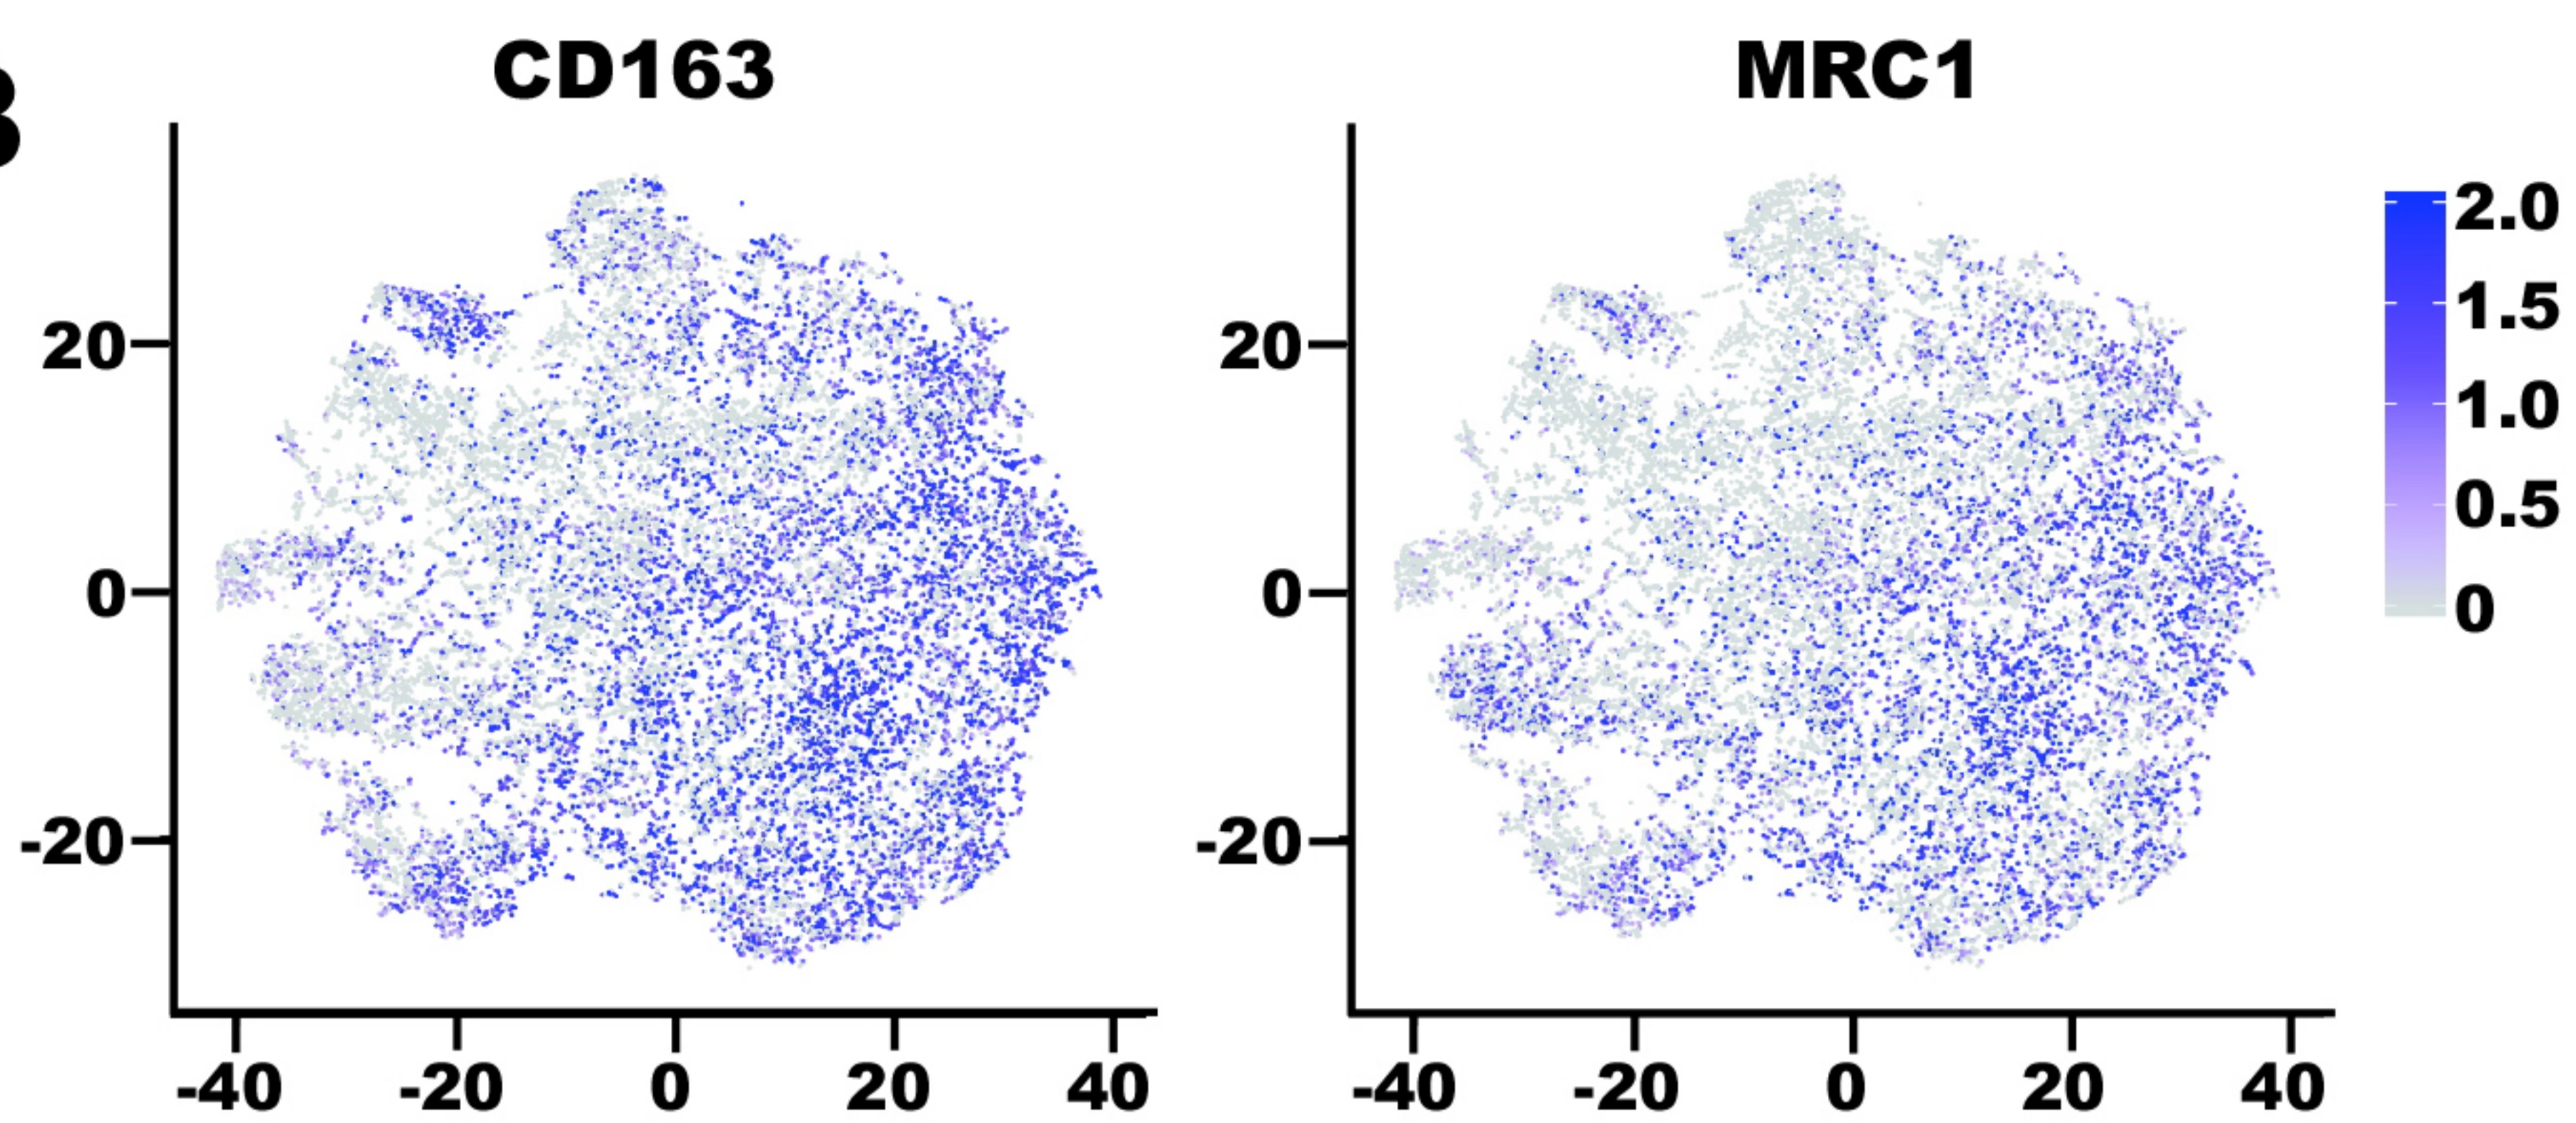

**C**

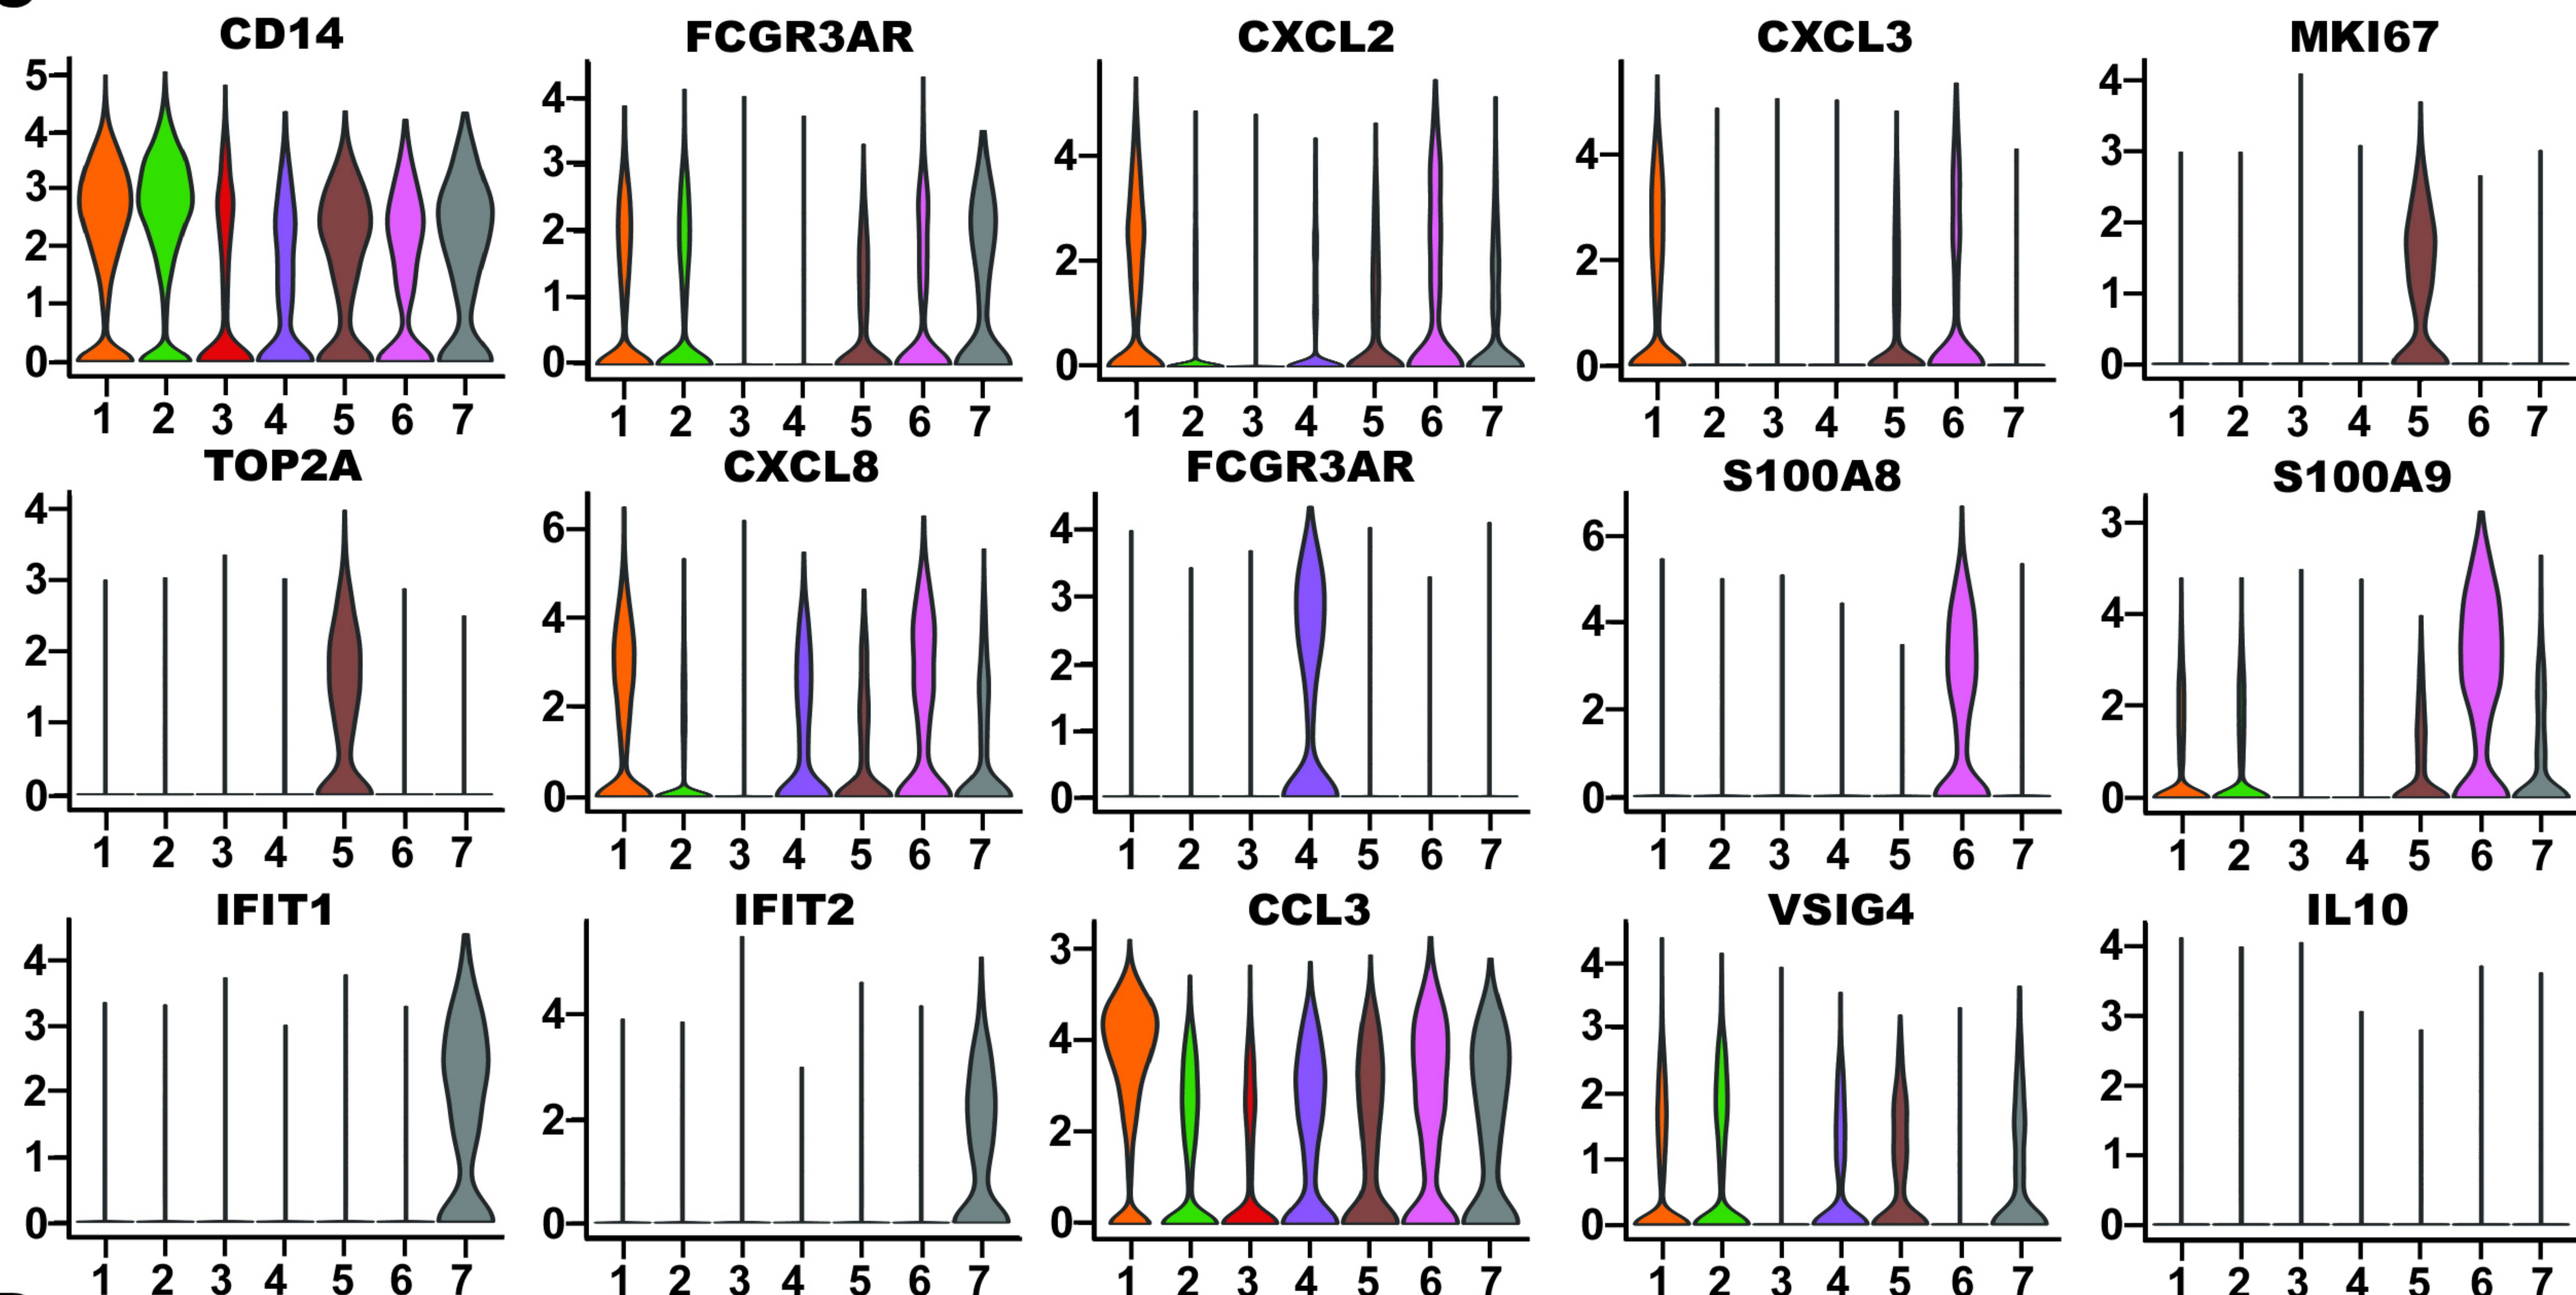

**D**

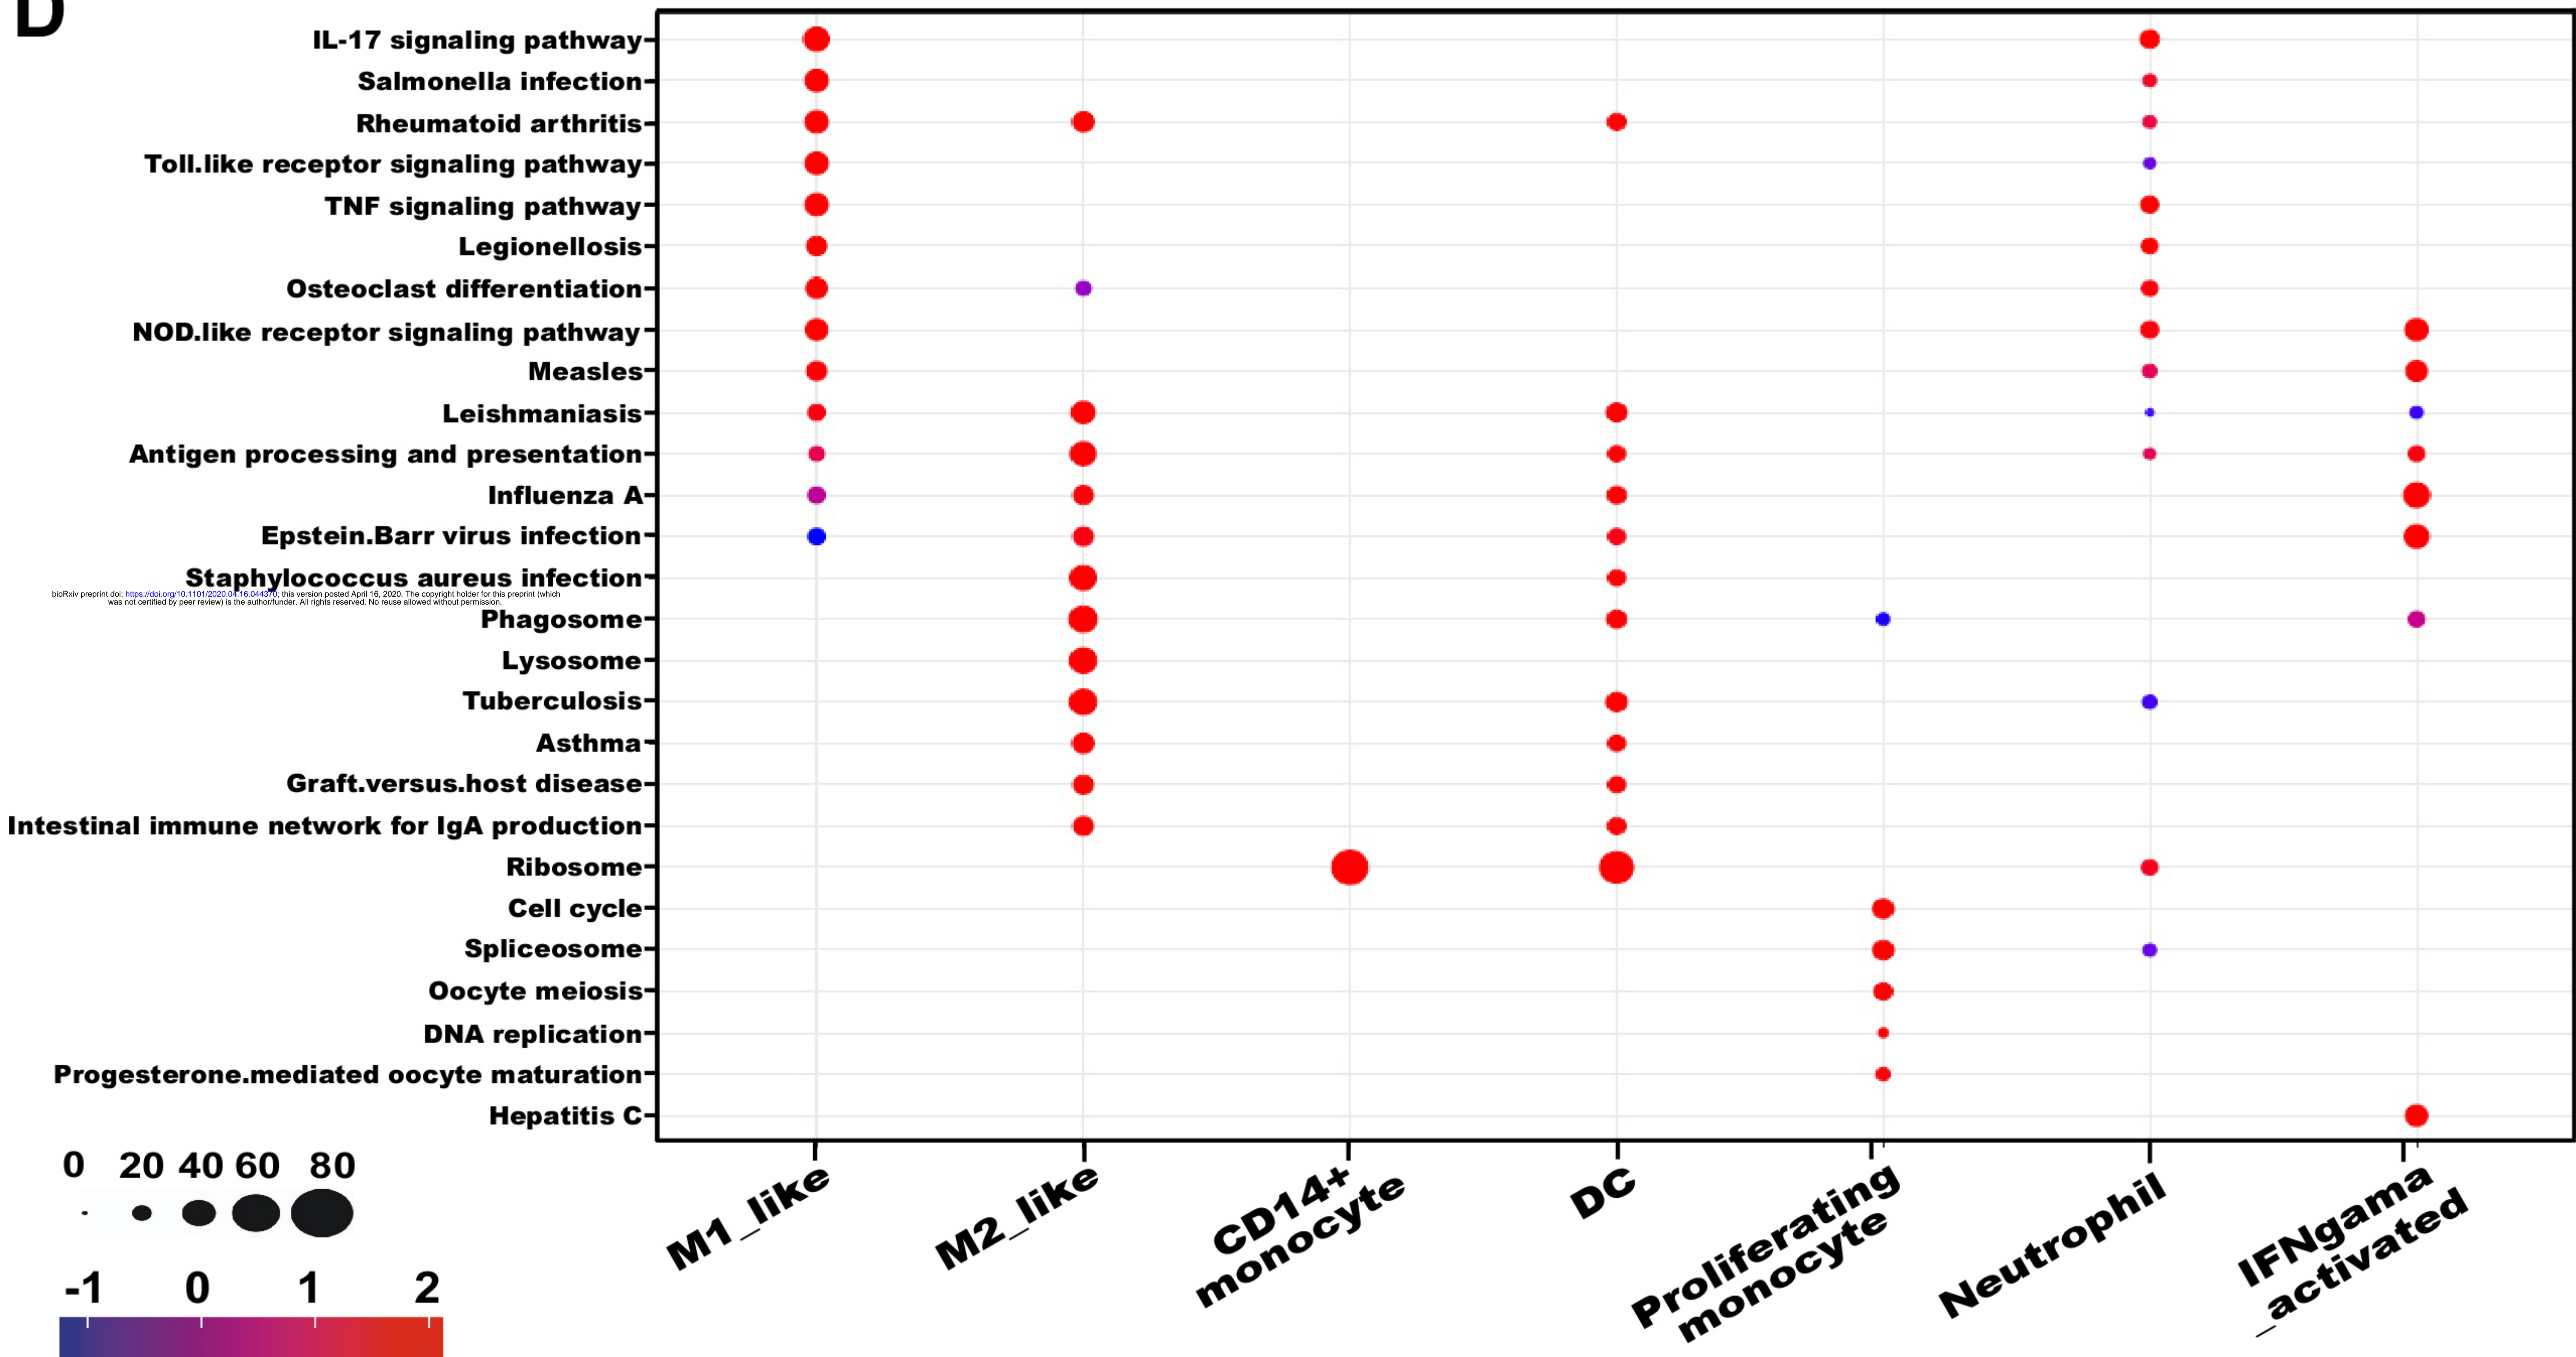

Figure 6

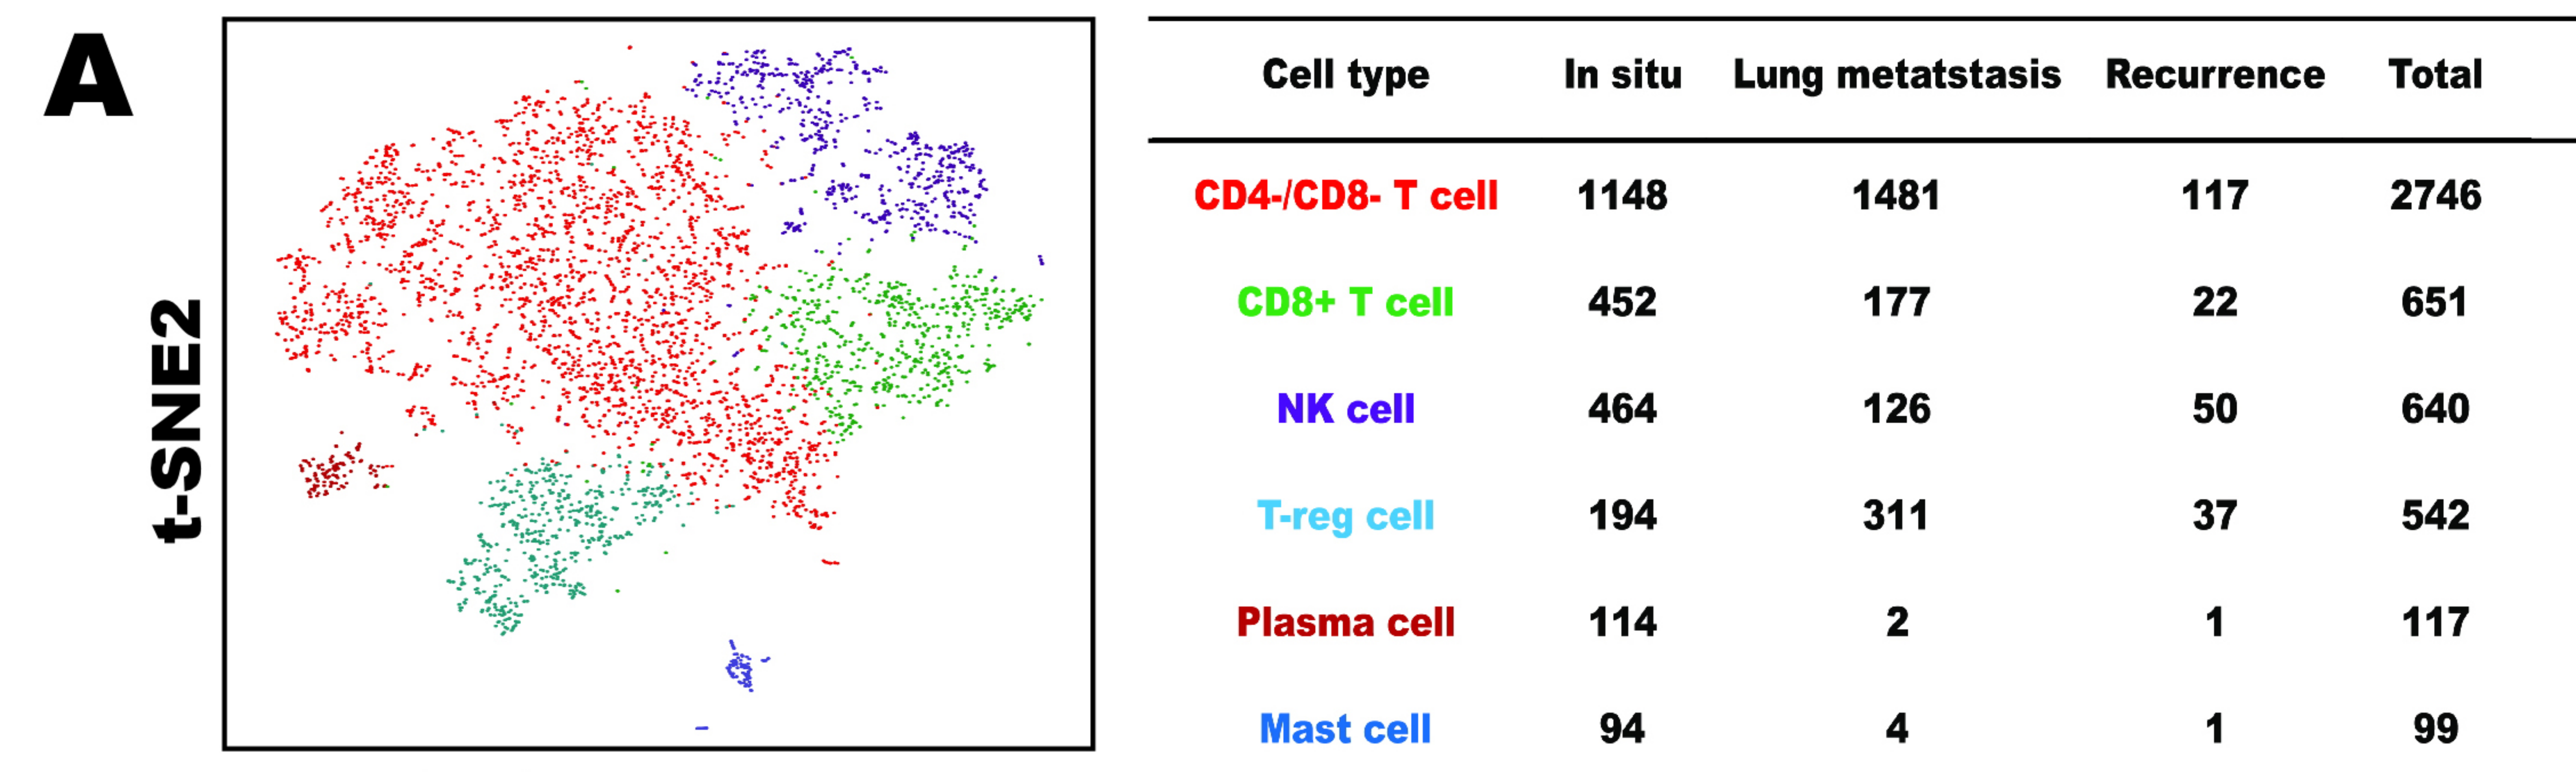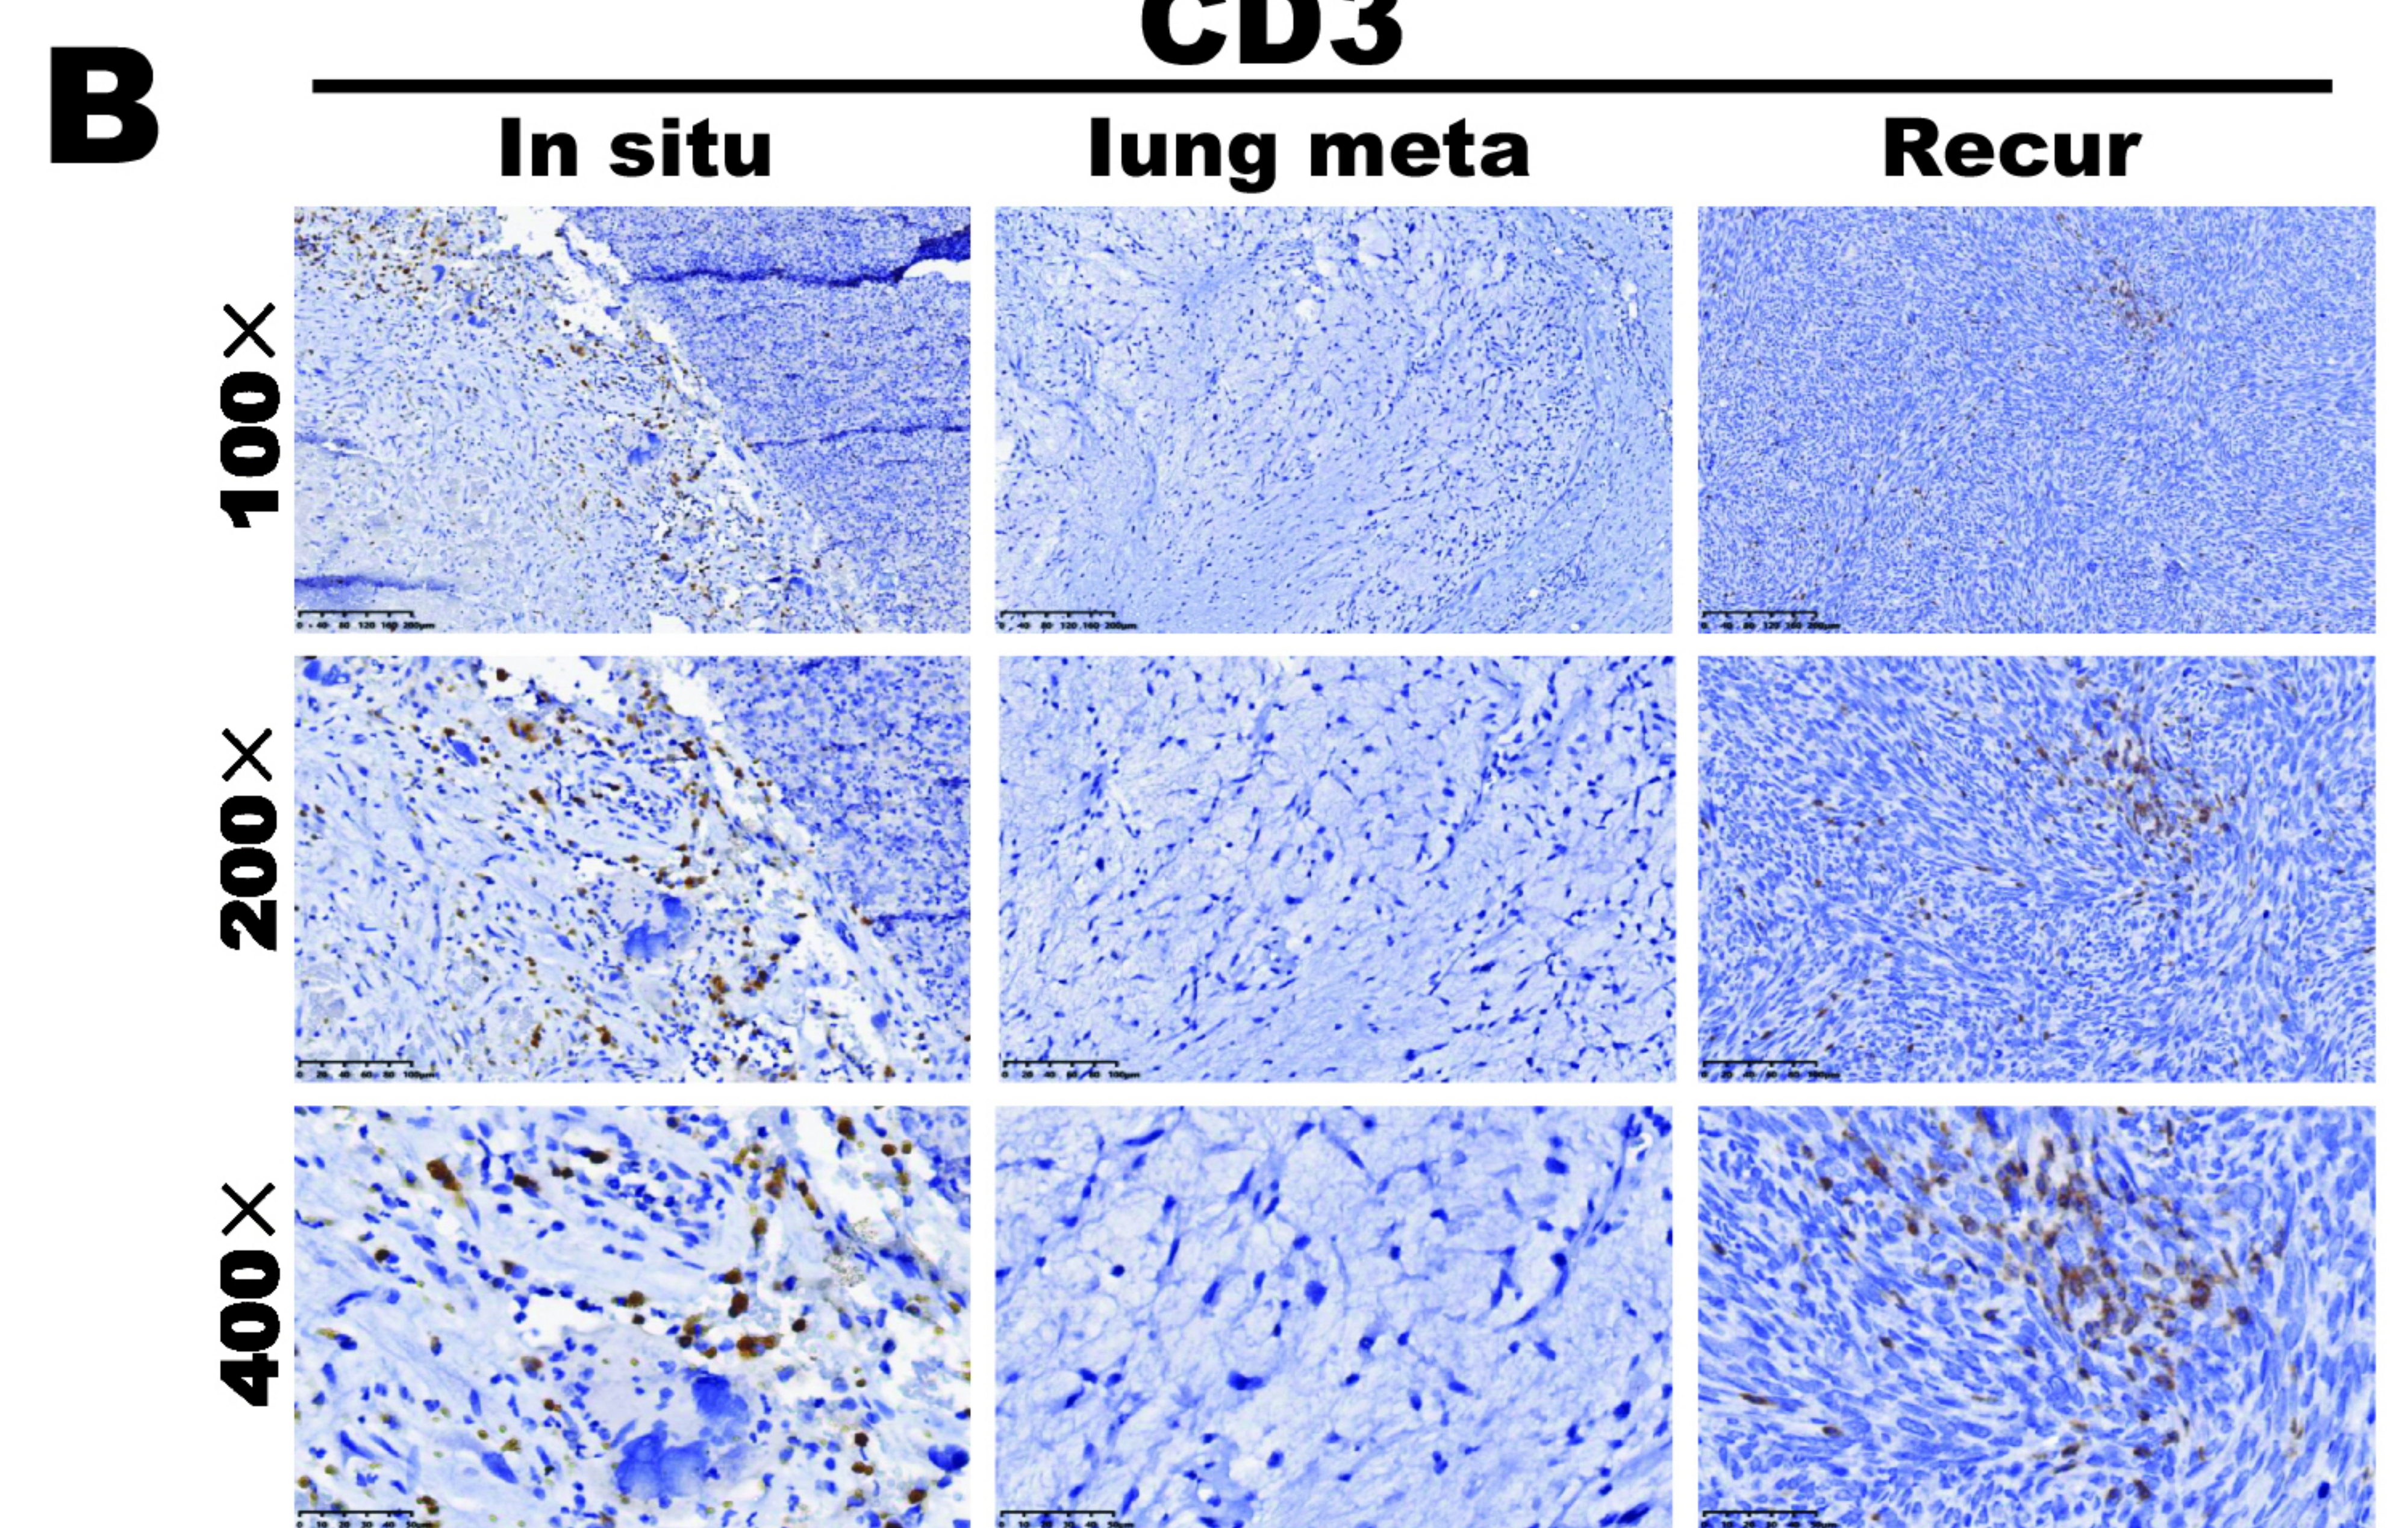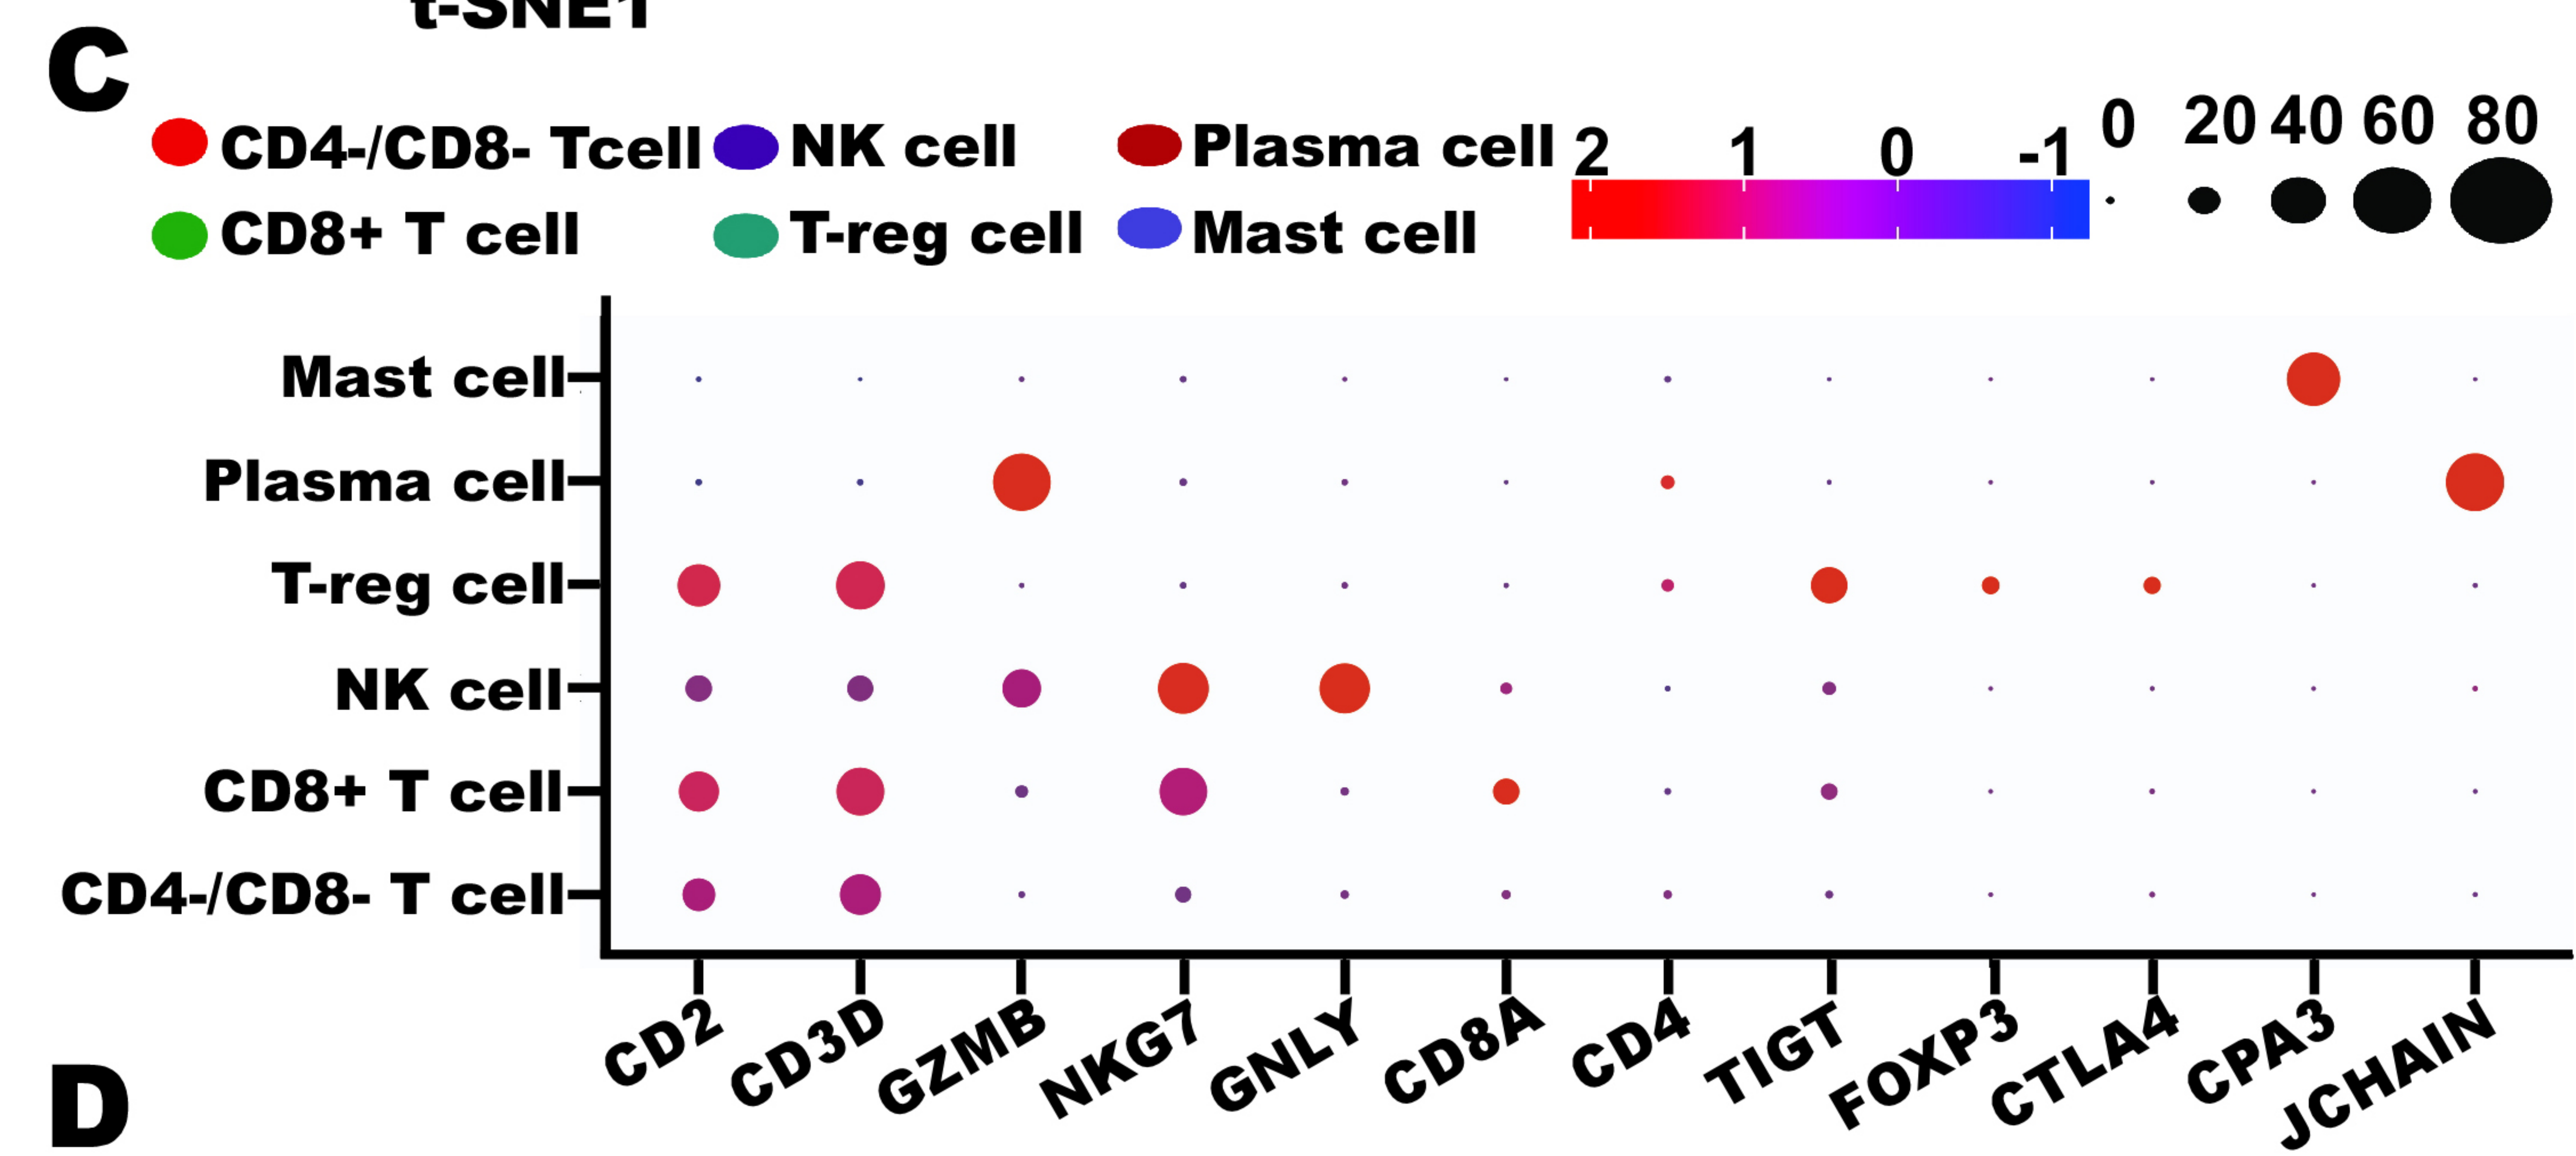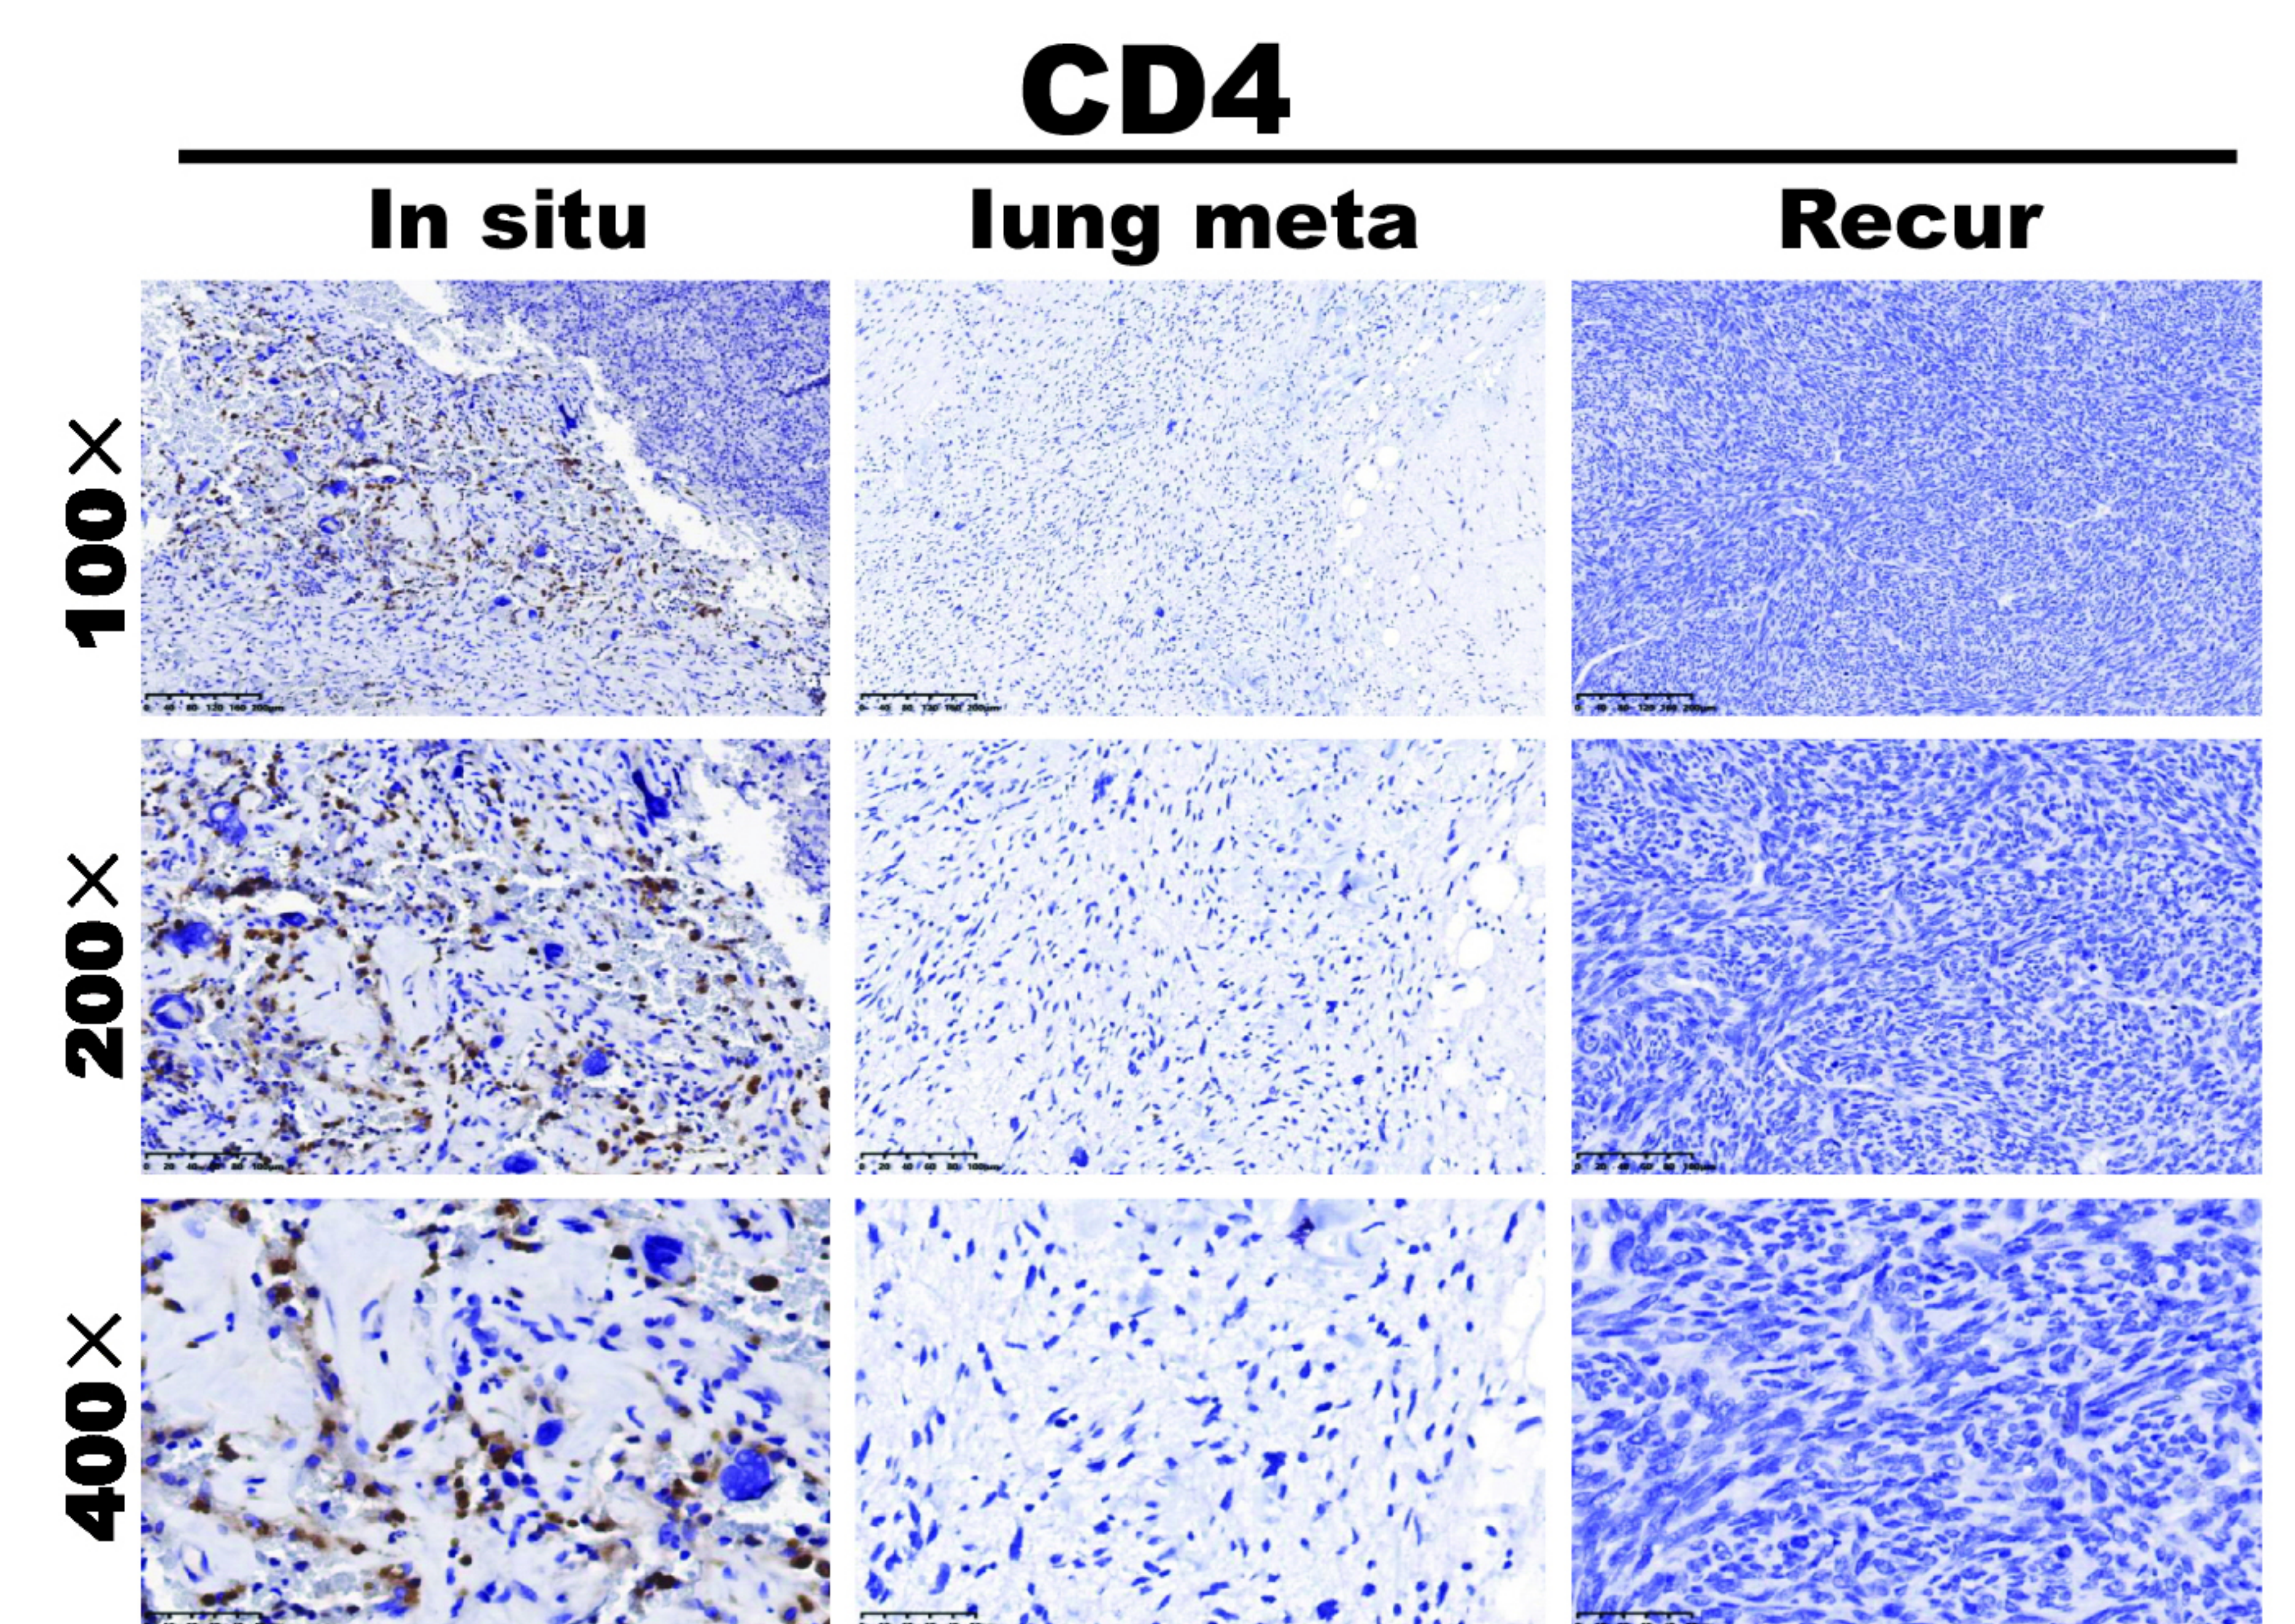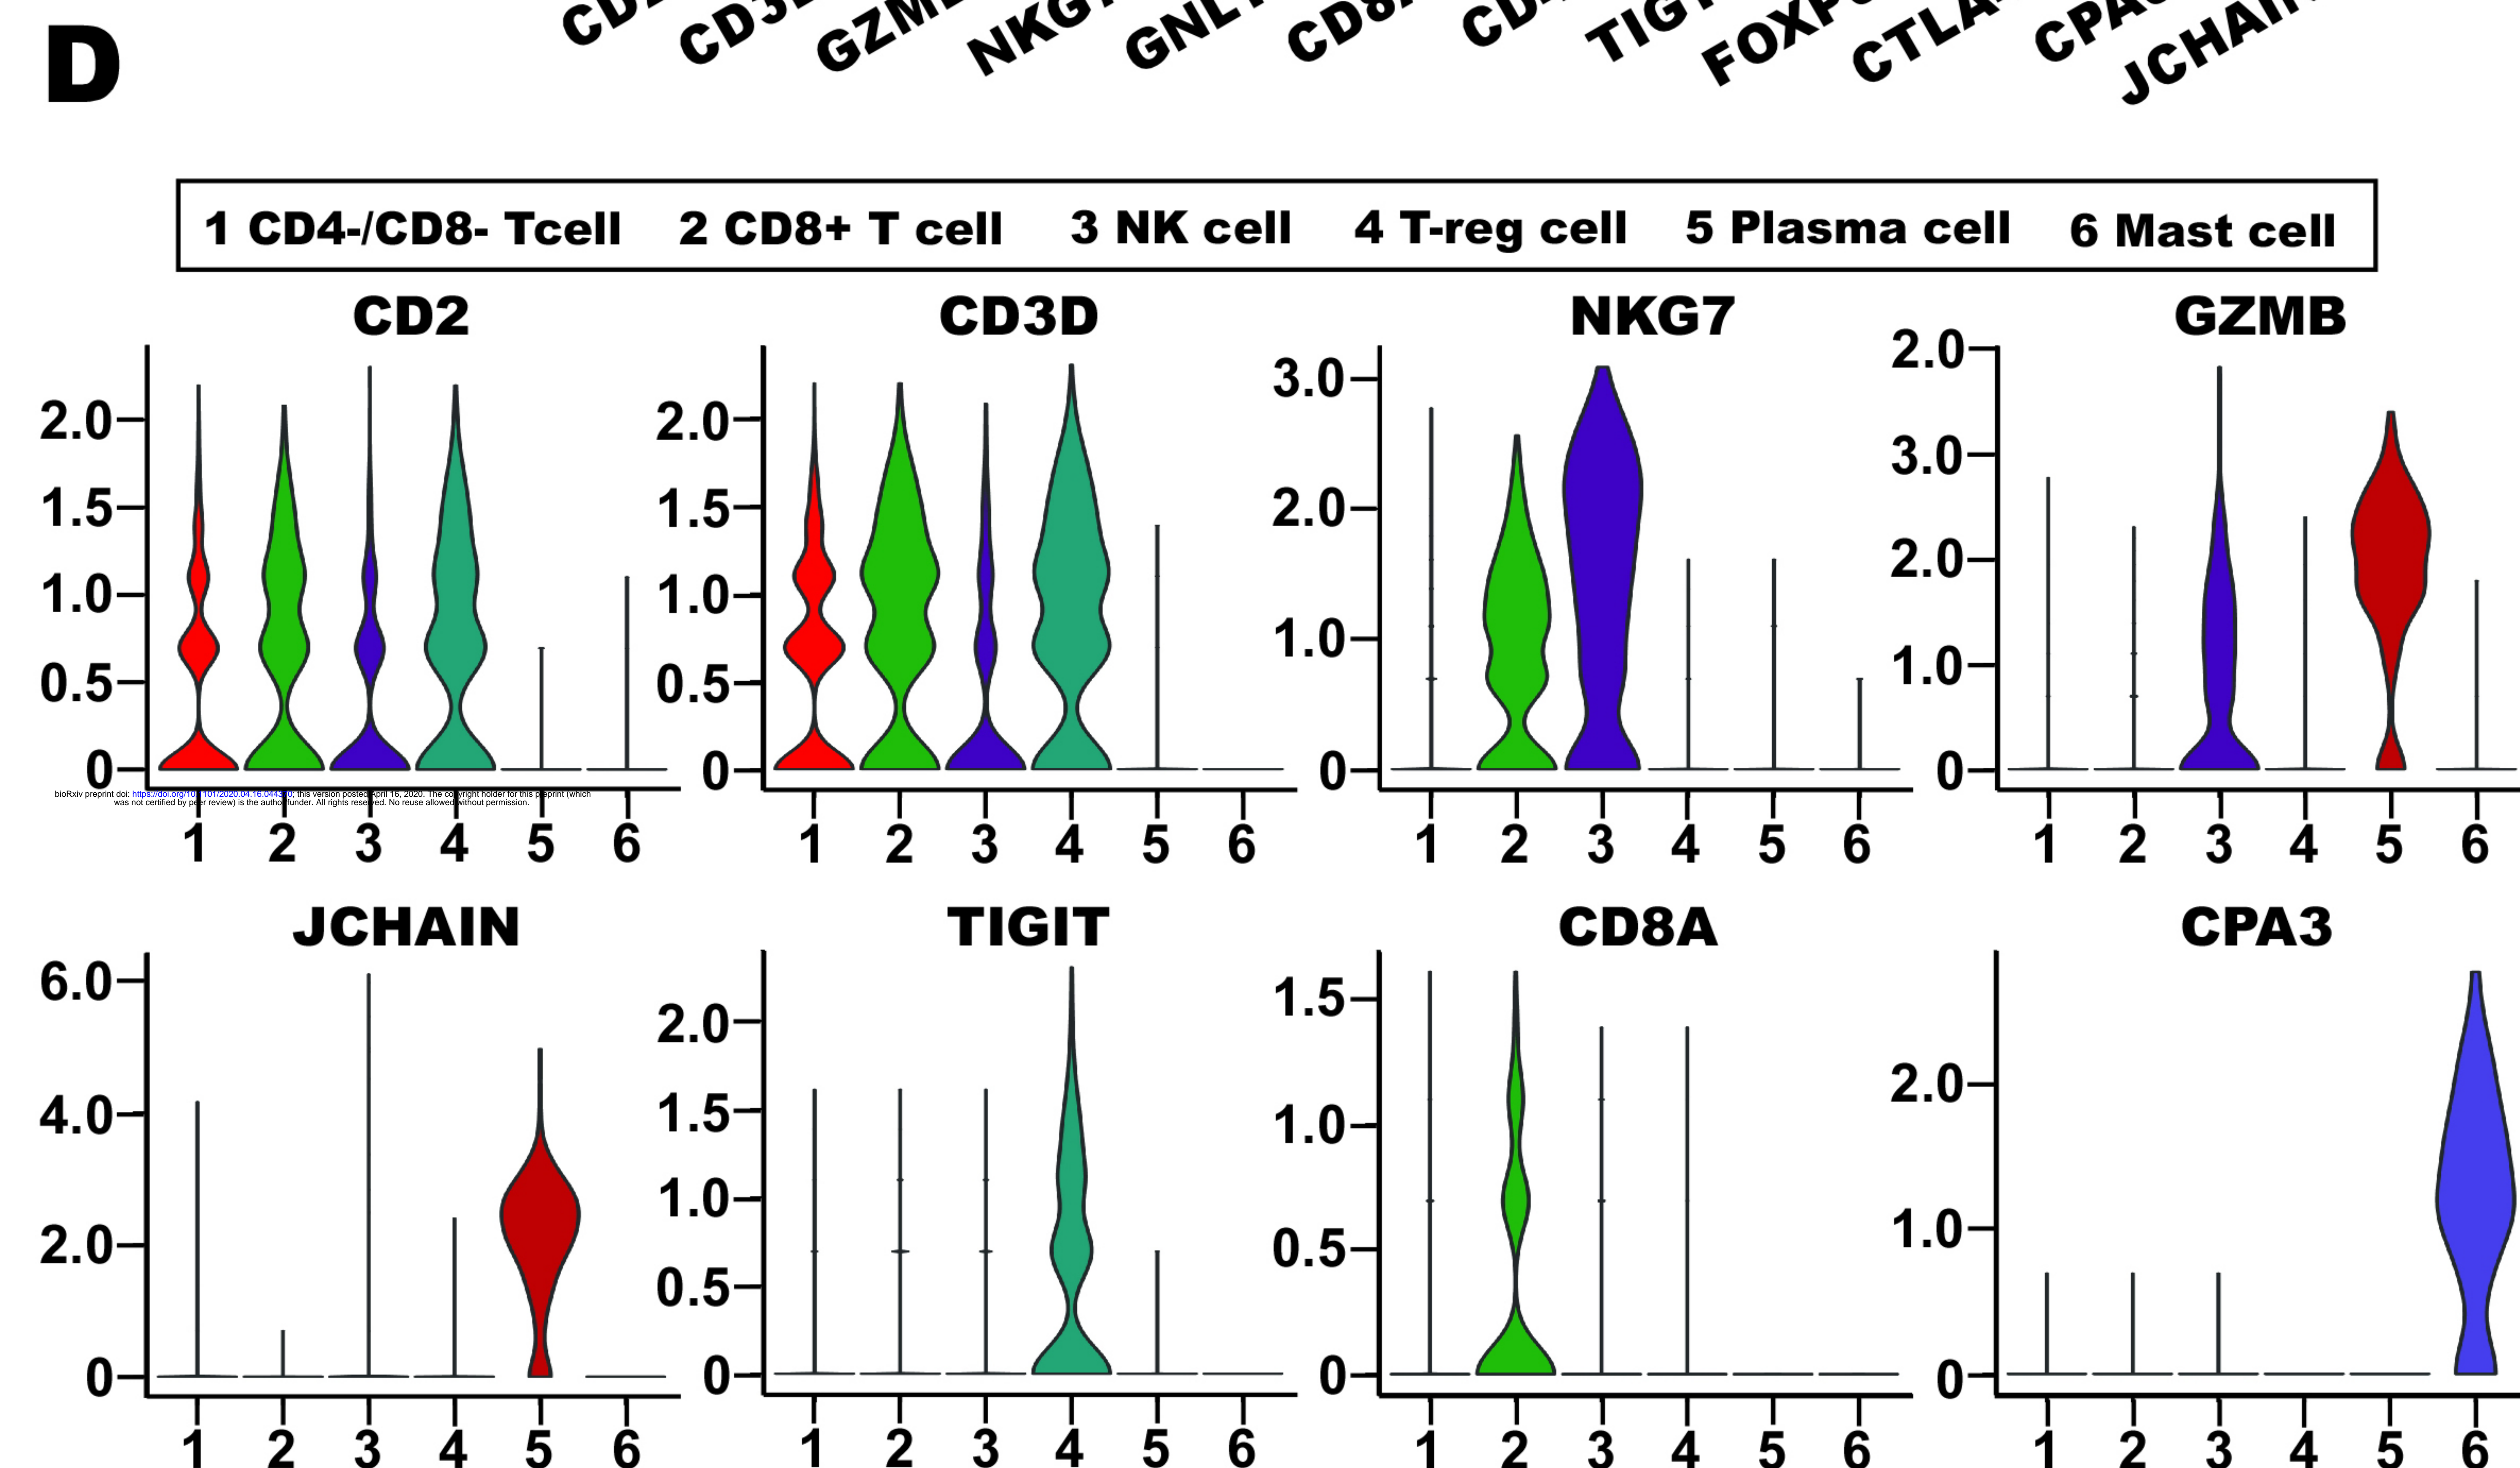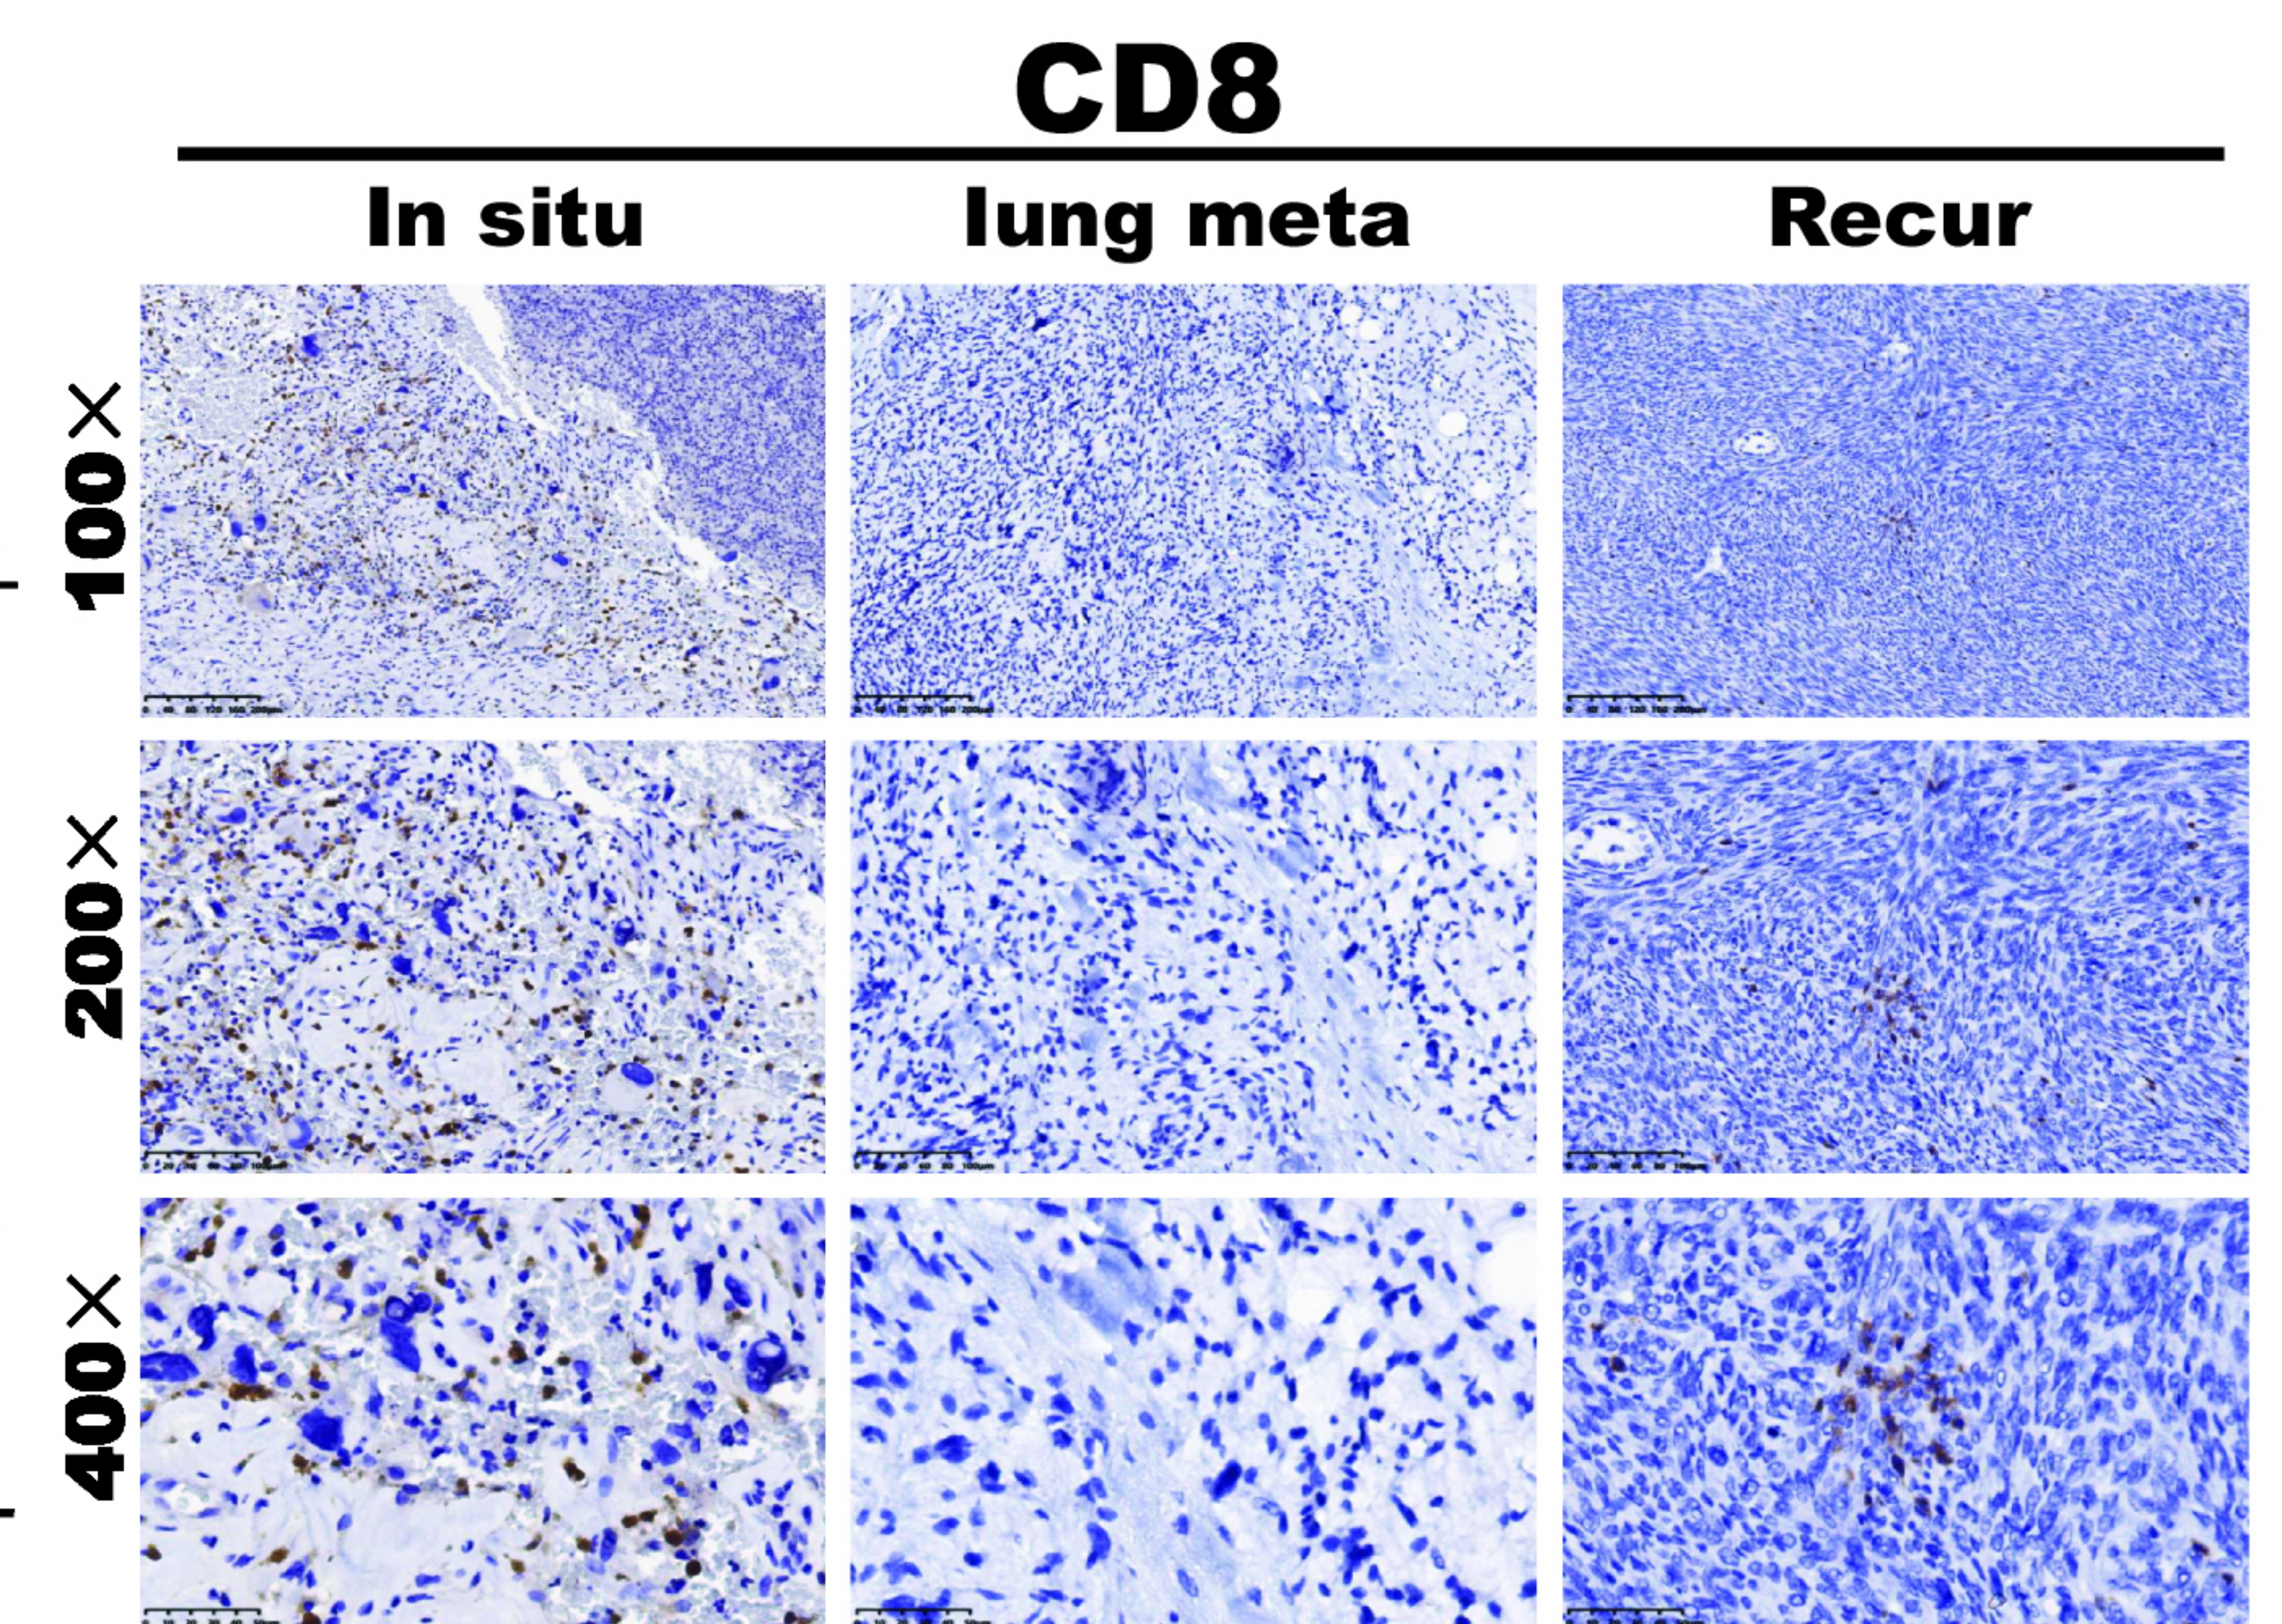

Figure 7

**A**

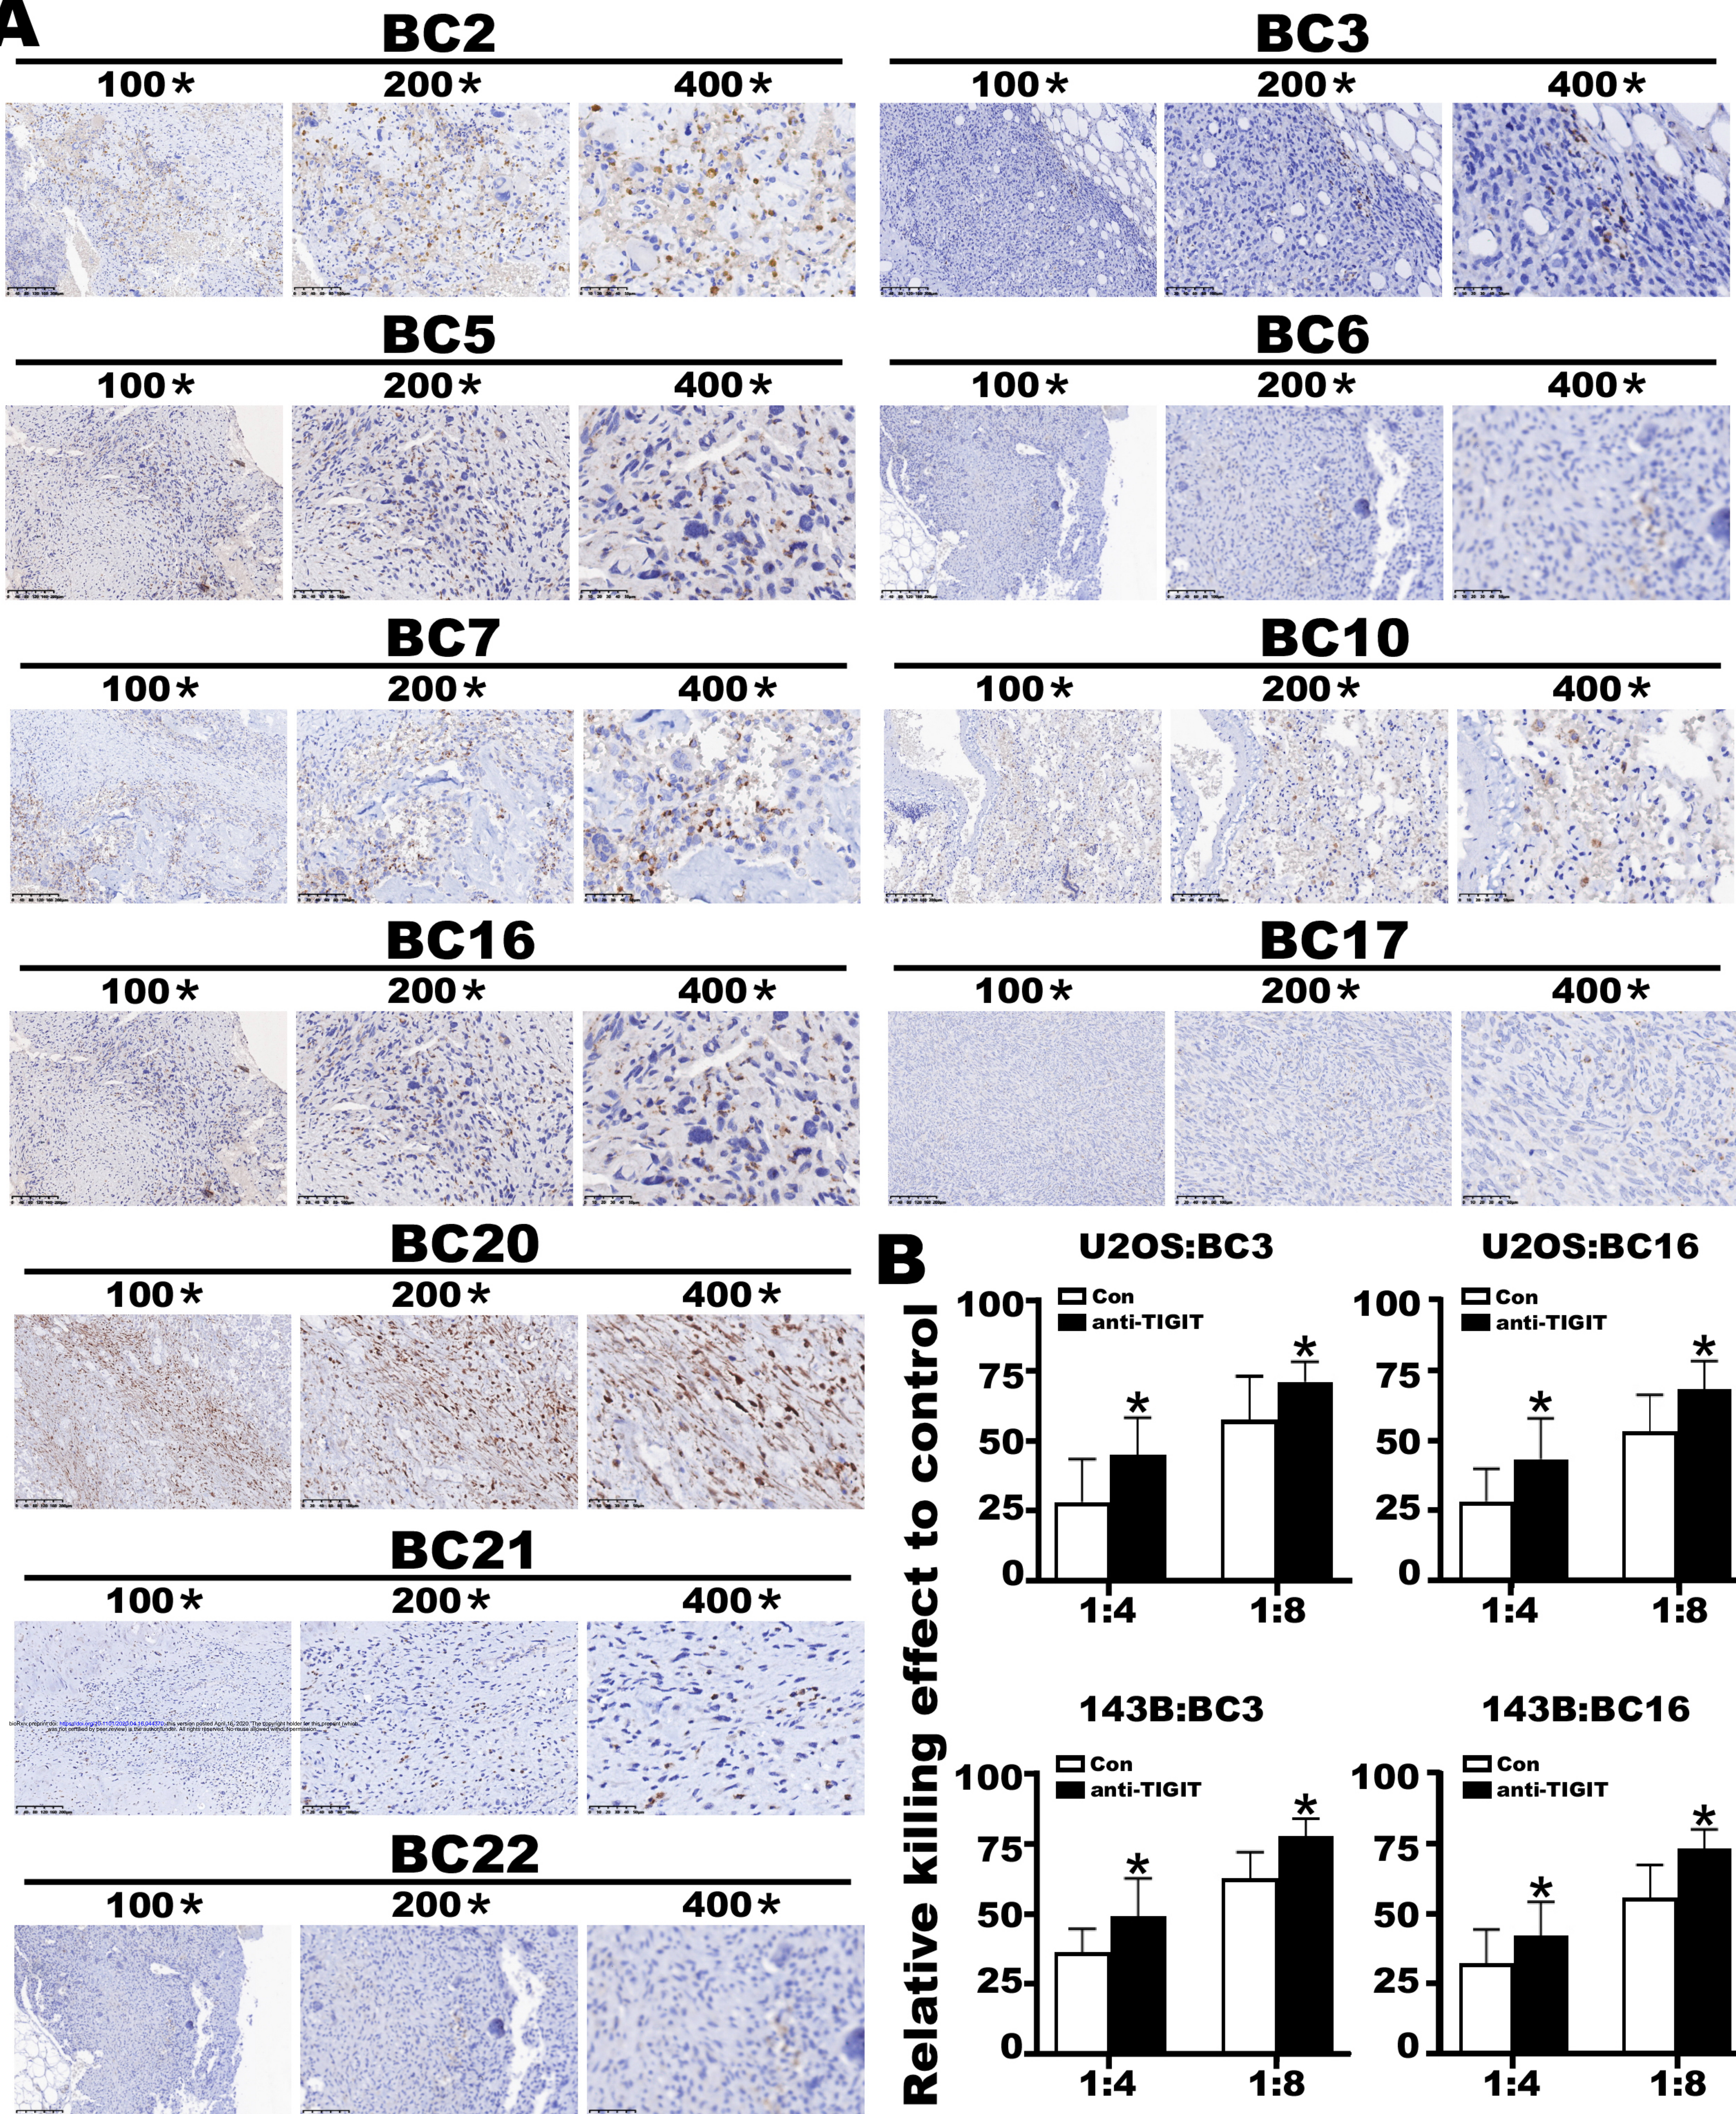

Source: https://www.biorxiv.org/content/10.1101/2020.04.16.044370v1.full.pdf
